# Supplementary material for: Carbohydrate nitrone and nitrile oxide cycloaddition approach to chiral sulfur heterocycles and nucleosides
Source: Royal Society of Chemistry journal article supplement (doi:10.1039/c2ra20689g), 2012-01-01

**SUPPLEMENTARY MATERIAL**

**Carbohydrate nitrene and nitrile oxide cycloaddition  
approach to chiral sulfur heterocycles and nucleosides**

**Subhrangshu Mukherjee, Sukhendu B. Mandal\* and Anup Bhattacharjya\***

*Chemistry Department, Indian Institute of Chemical Biology (a unit of CSIR), 4,*

*Raja S. C. Mullick Road, Kolkata 700032, India*

Email: [anupbh@hotmail.com](mailto:anupbh@hotmail.com); [anupbhattacharjya@gmail.com](mailto:anupbhattacharjya@gmail.com)

[sbmandal@iicb.res.in](mailto:sbmandal@iicb.res.in)

S2

$^{13}\text{C}$  NMR spectrum ( $\text{CDCl}_3$ , 75 MHz) of **2**

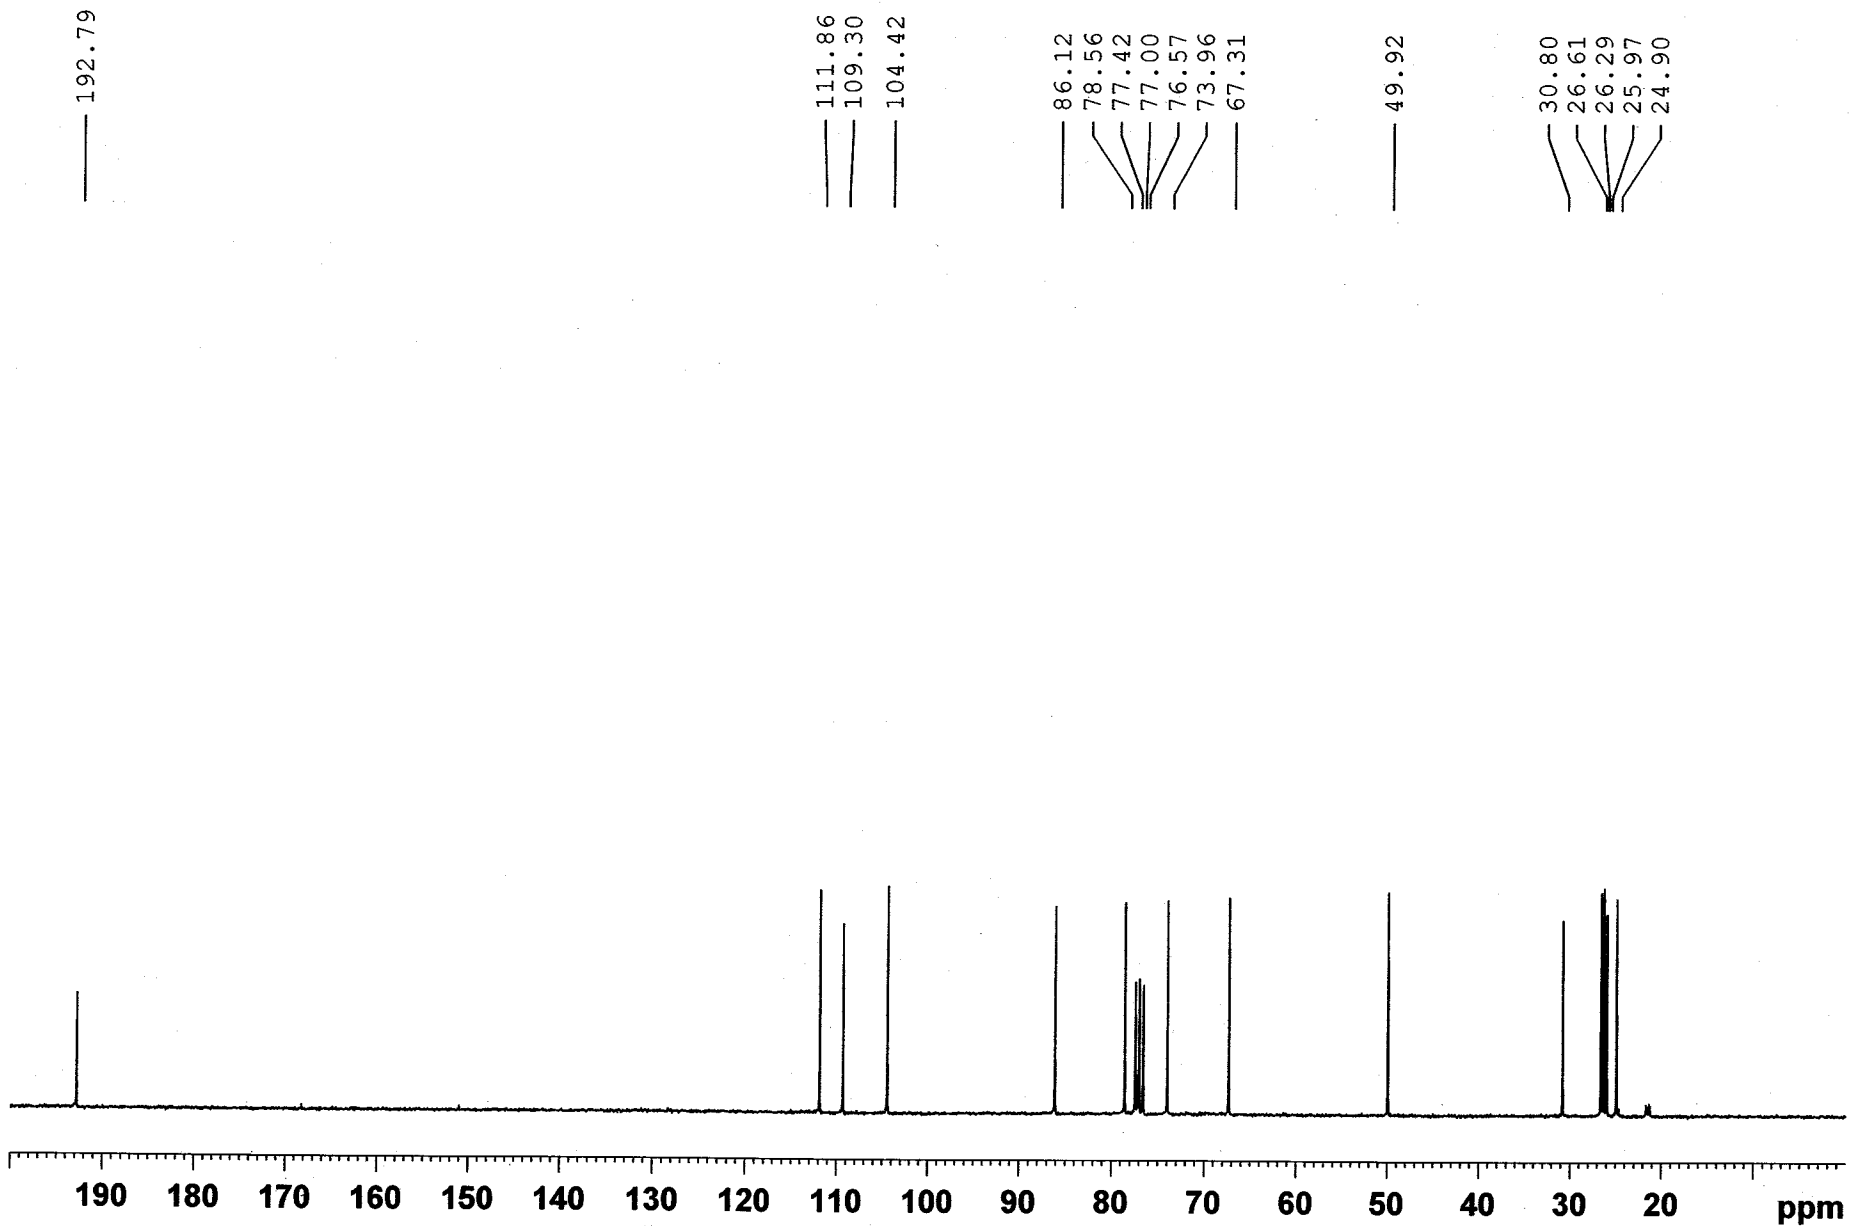

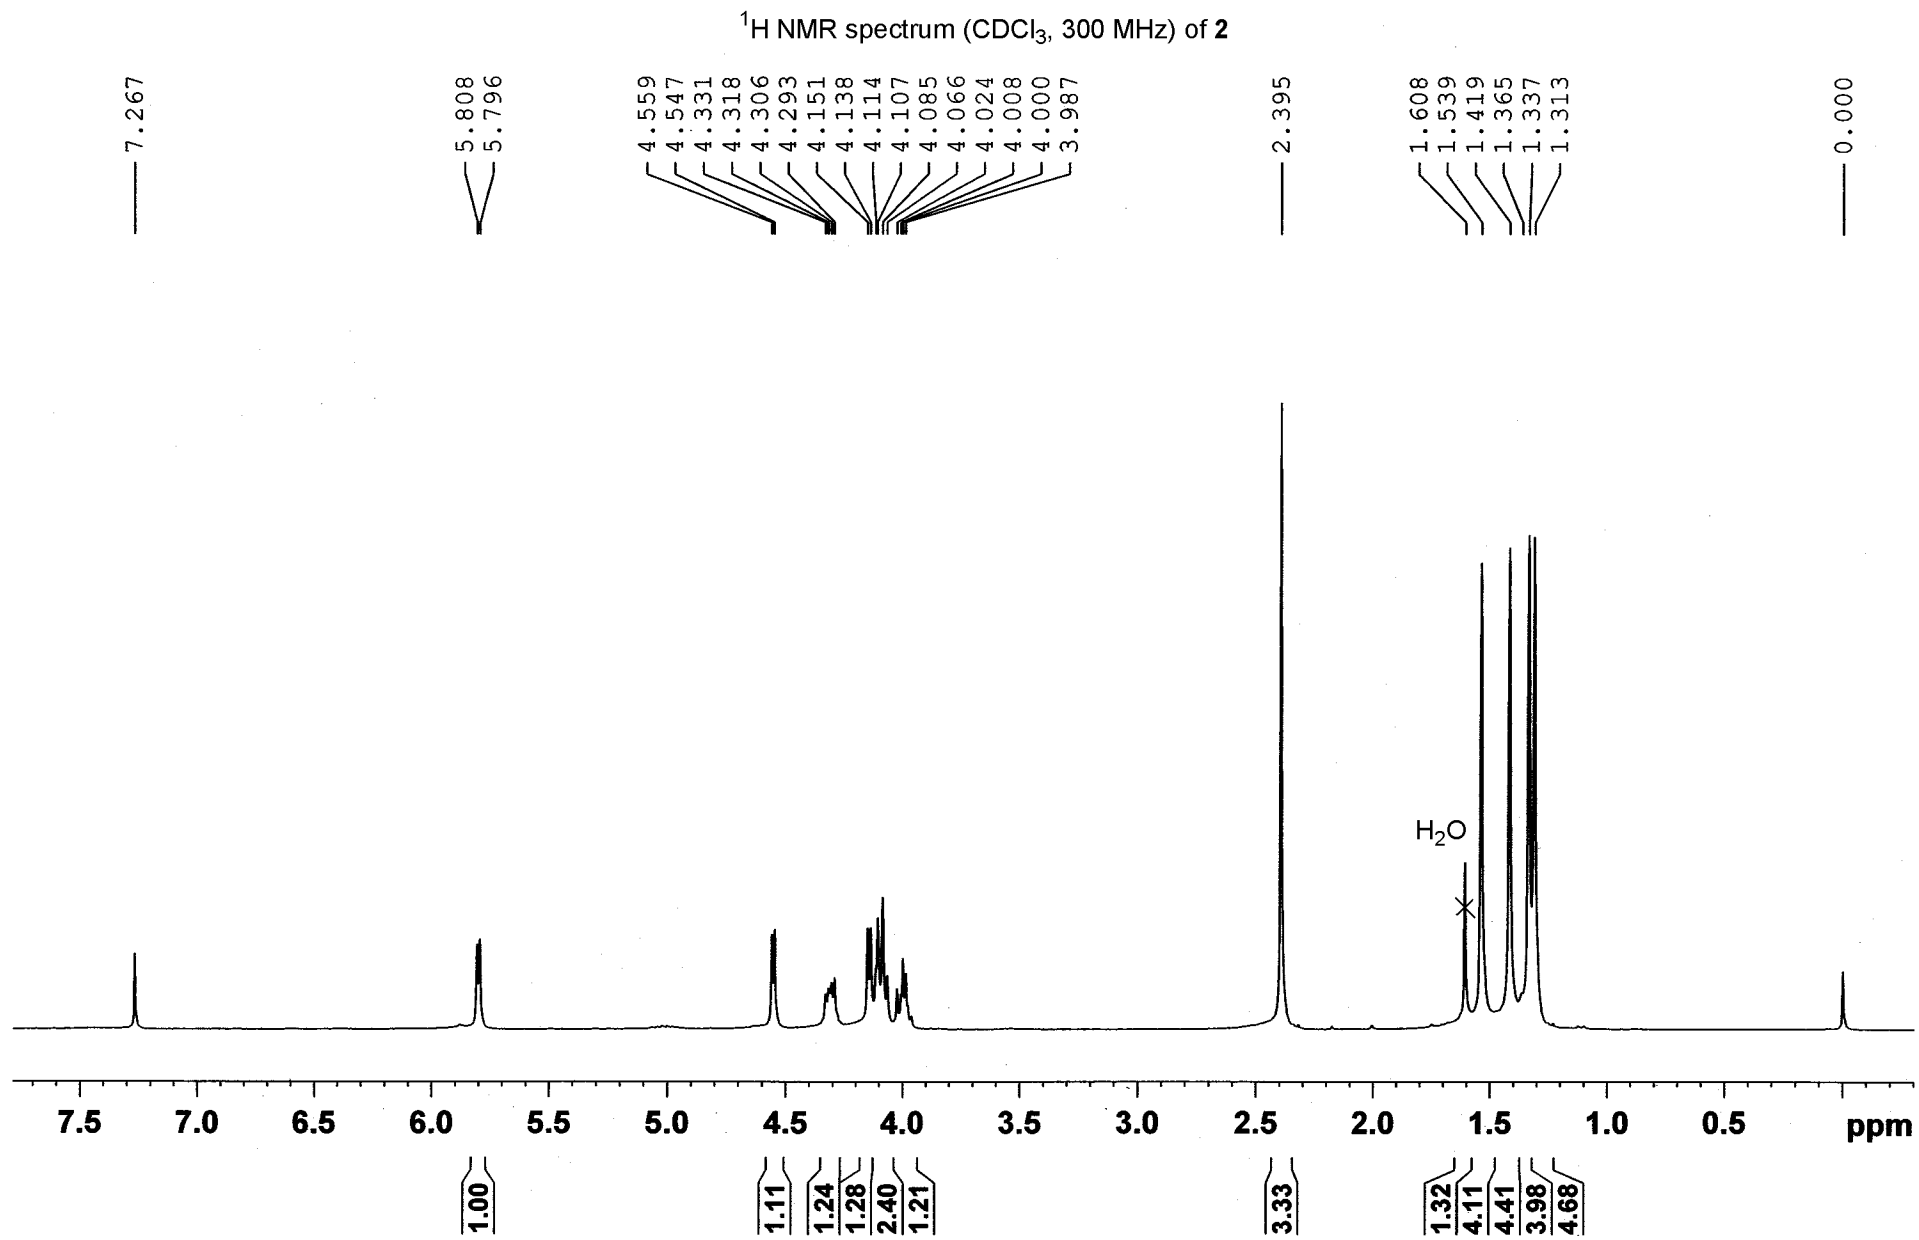

$^{13}\text{C}$  NMR spectrum ( $\text{CDCl}_3$ , 75 MHz) of **3**

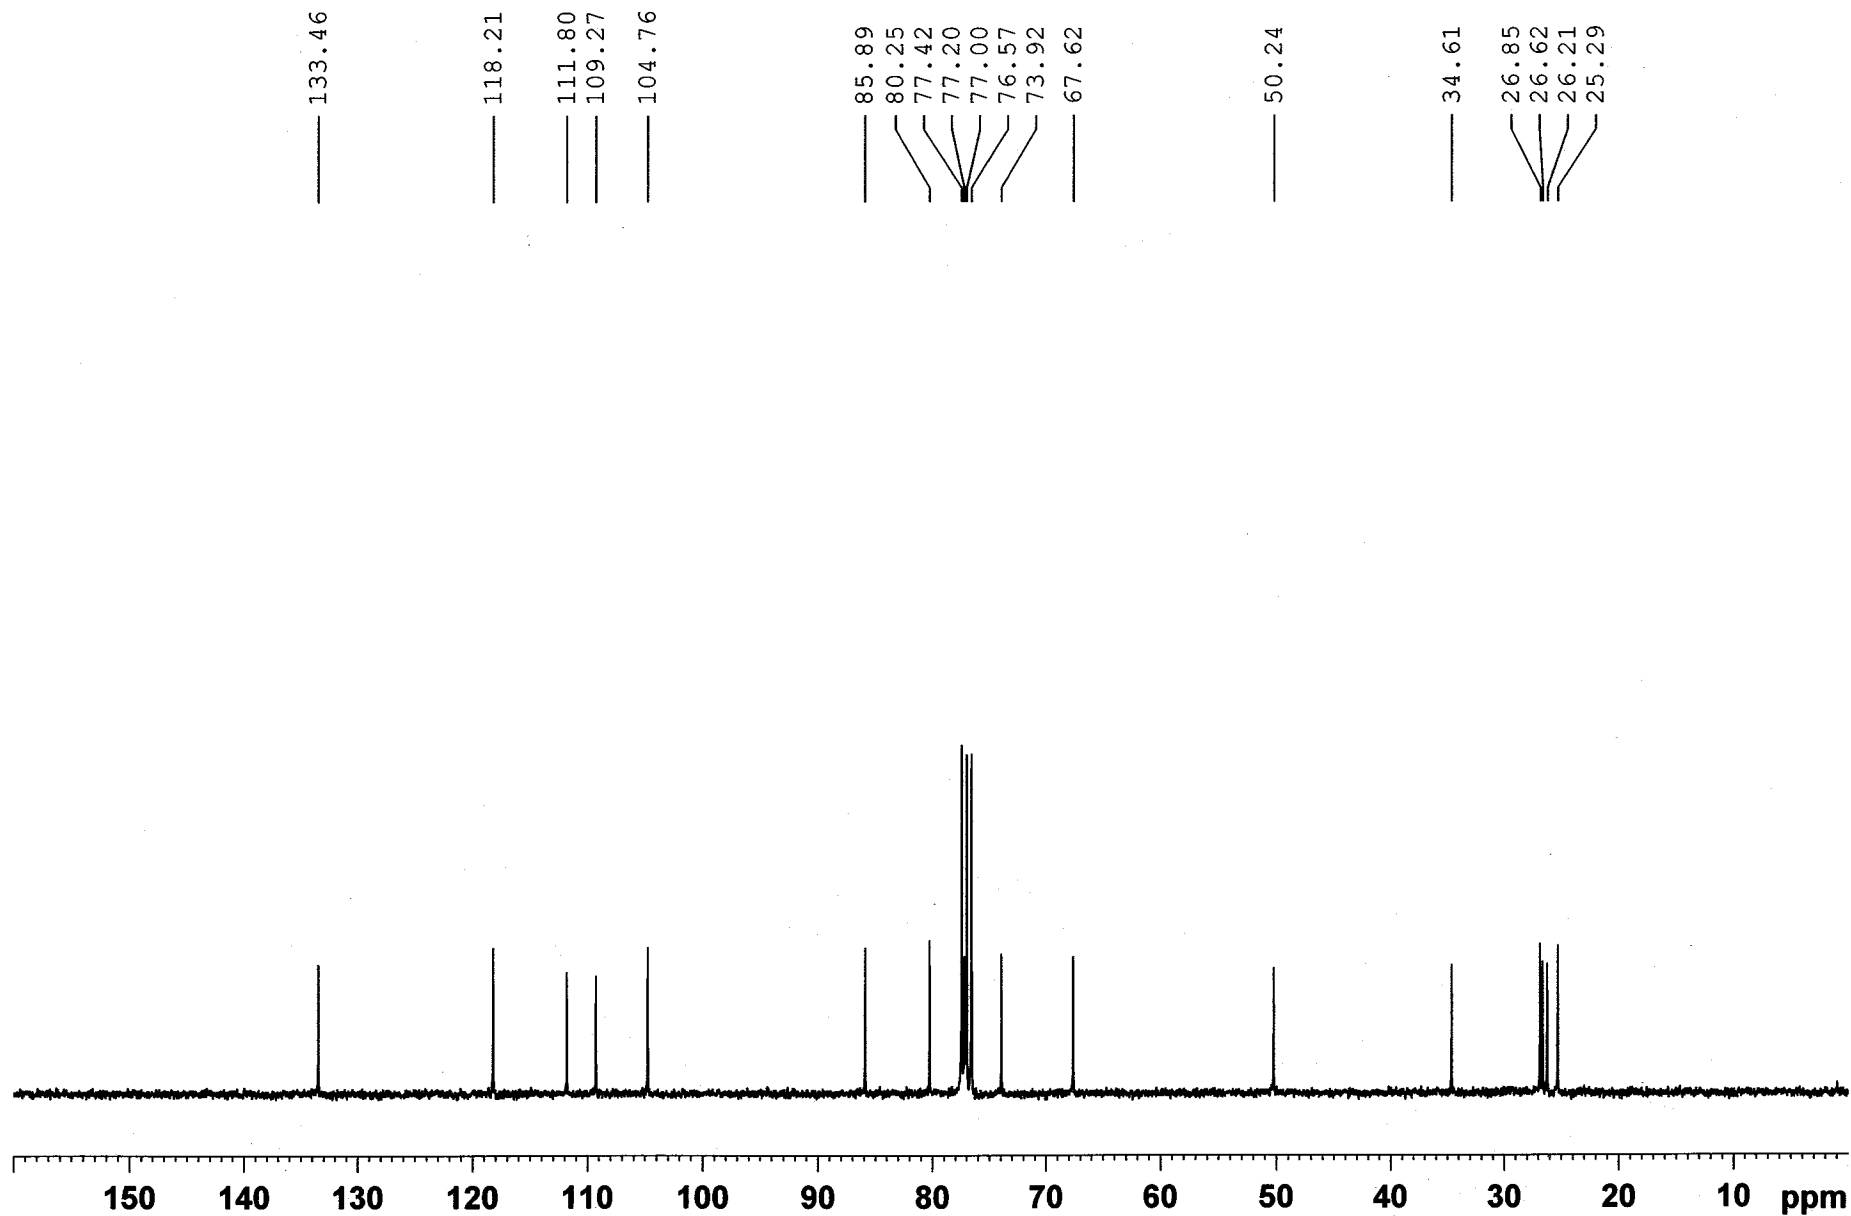

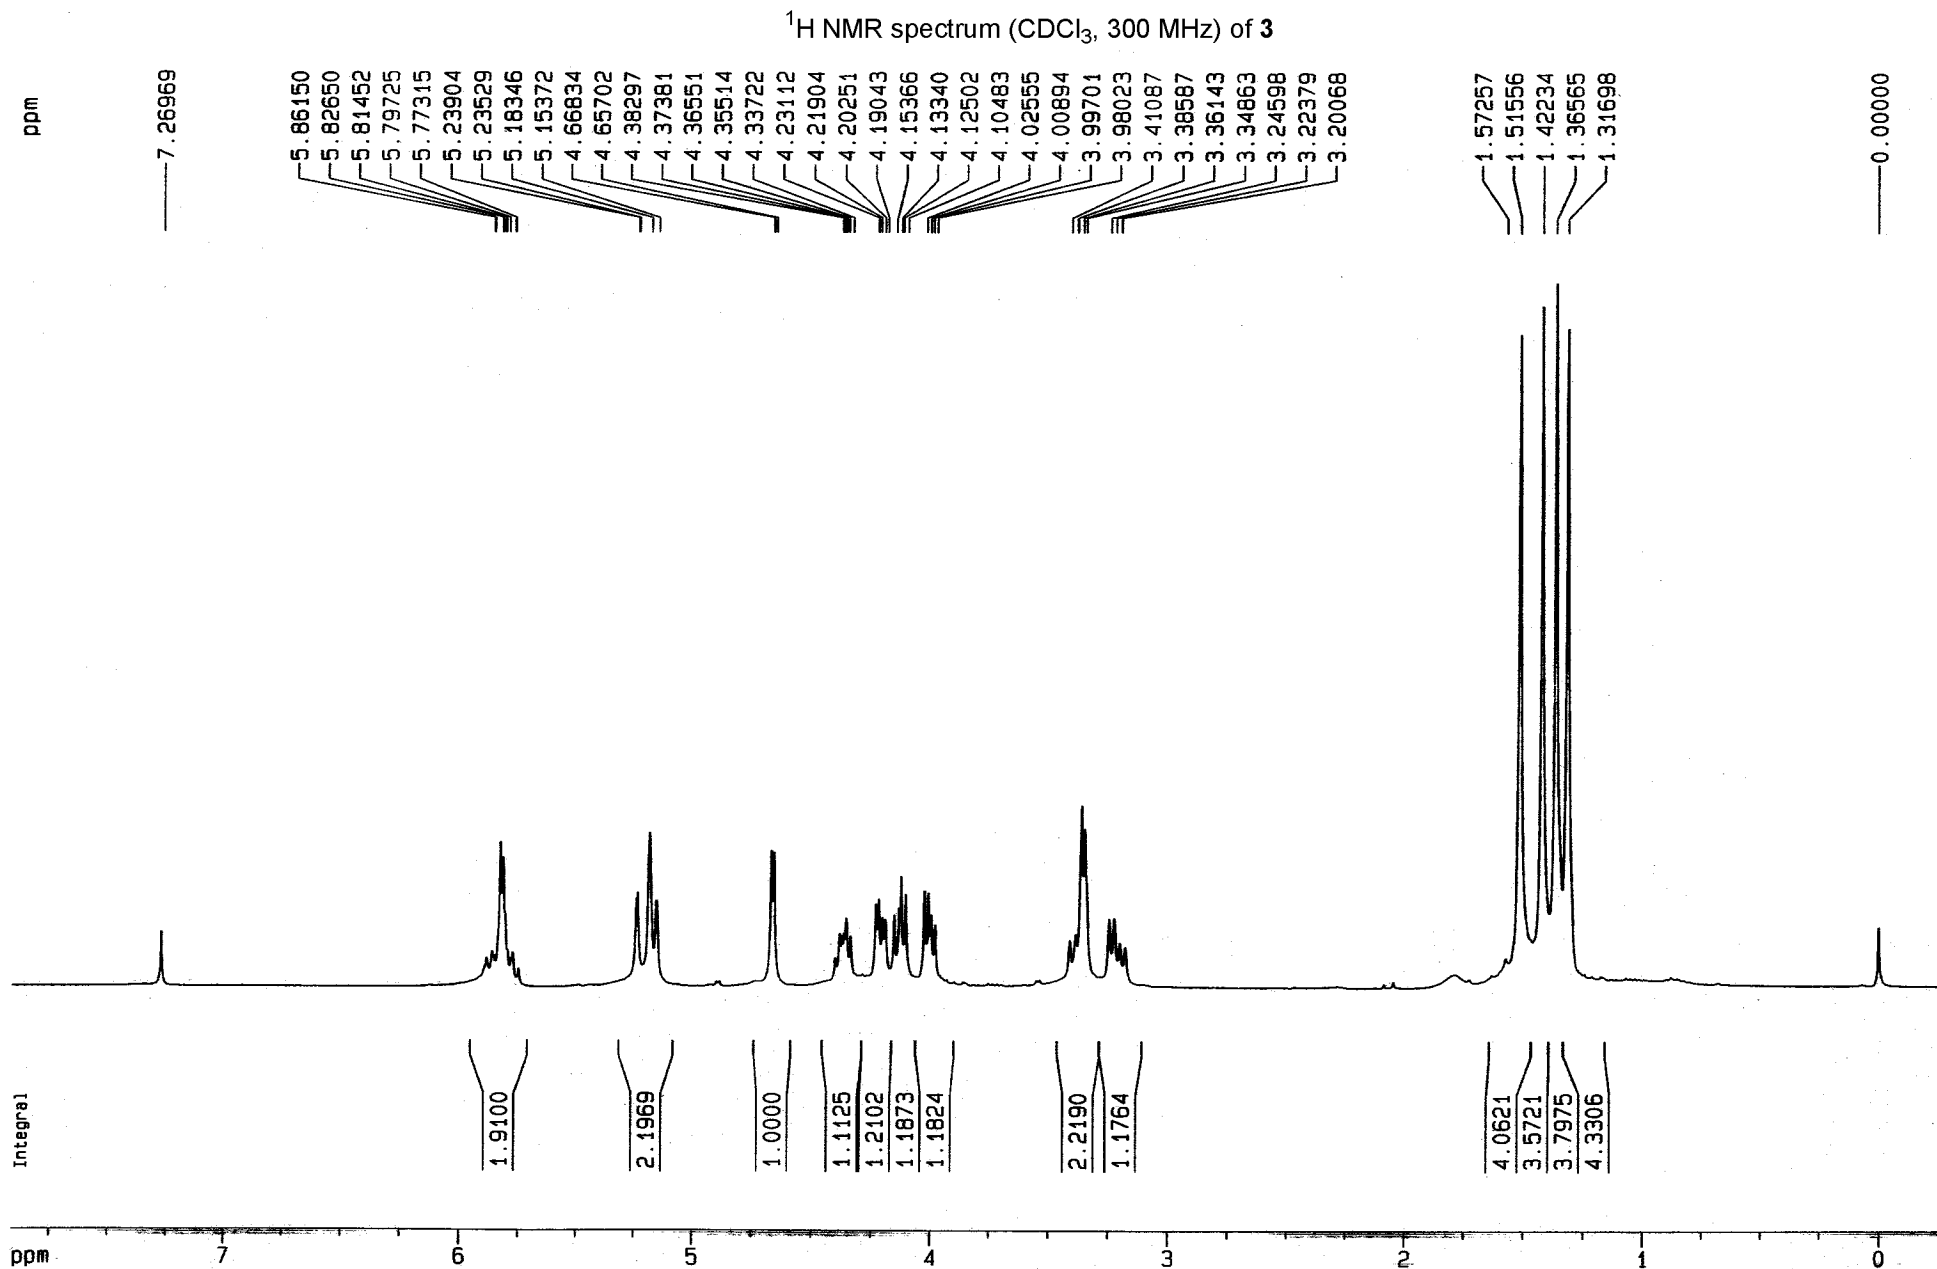

S6

$^{13}\text{C}$  NMR spectrum ( $\text{CDCl}_3$ , 150 MHz) of **6**

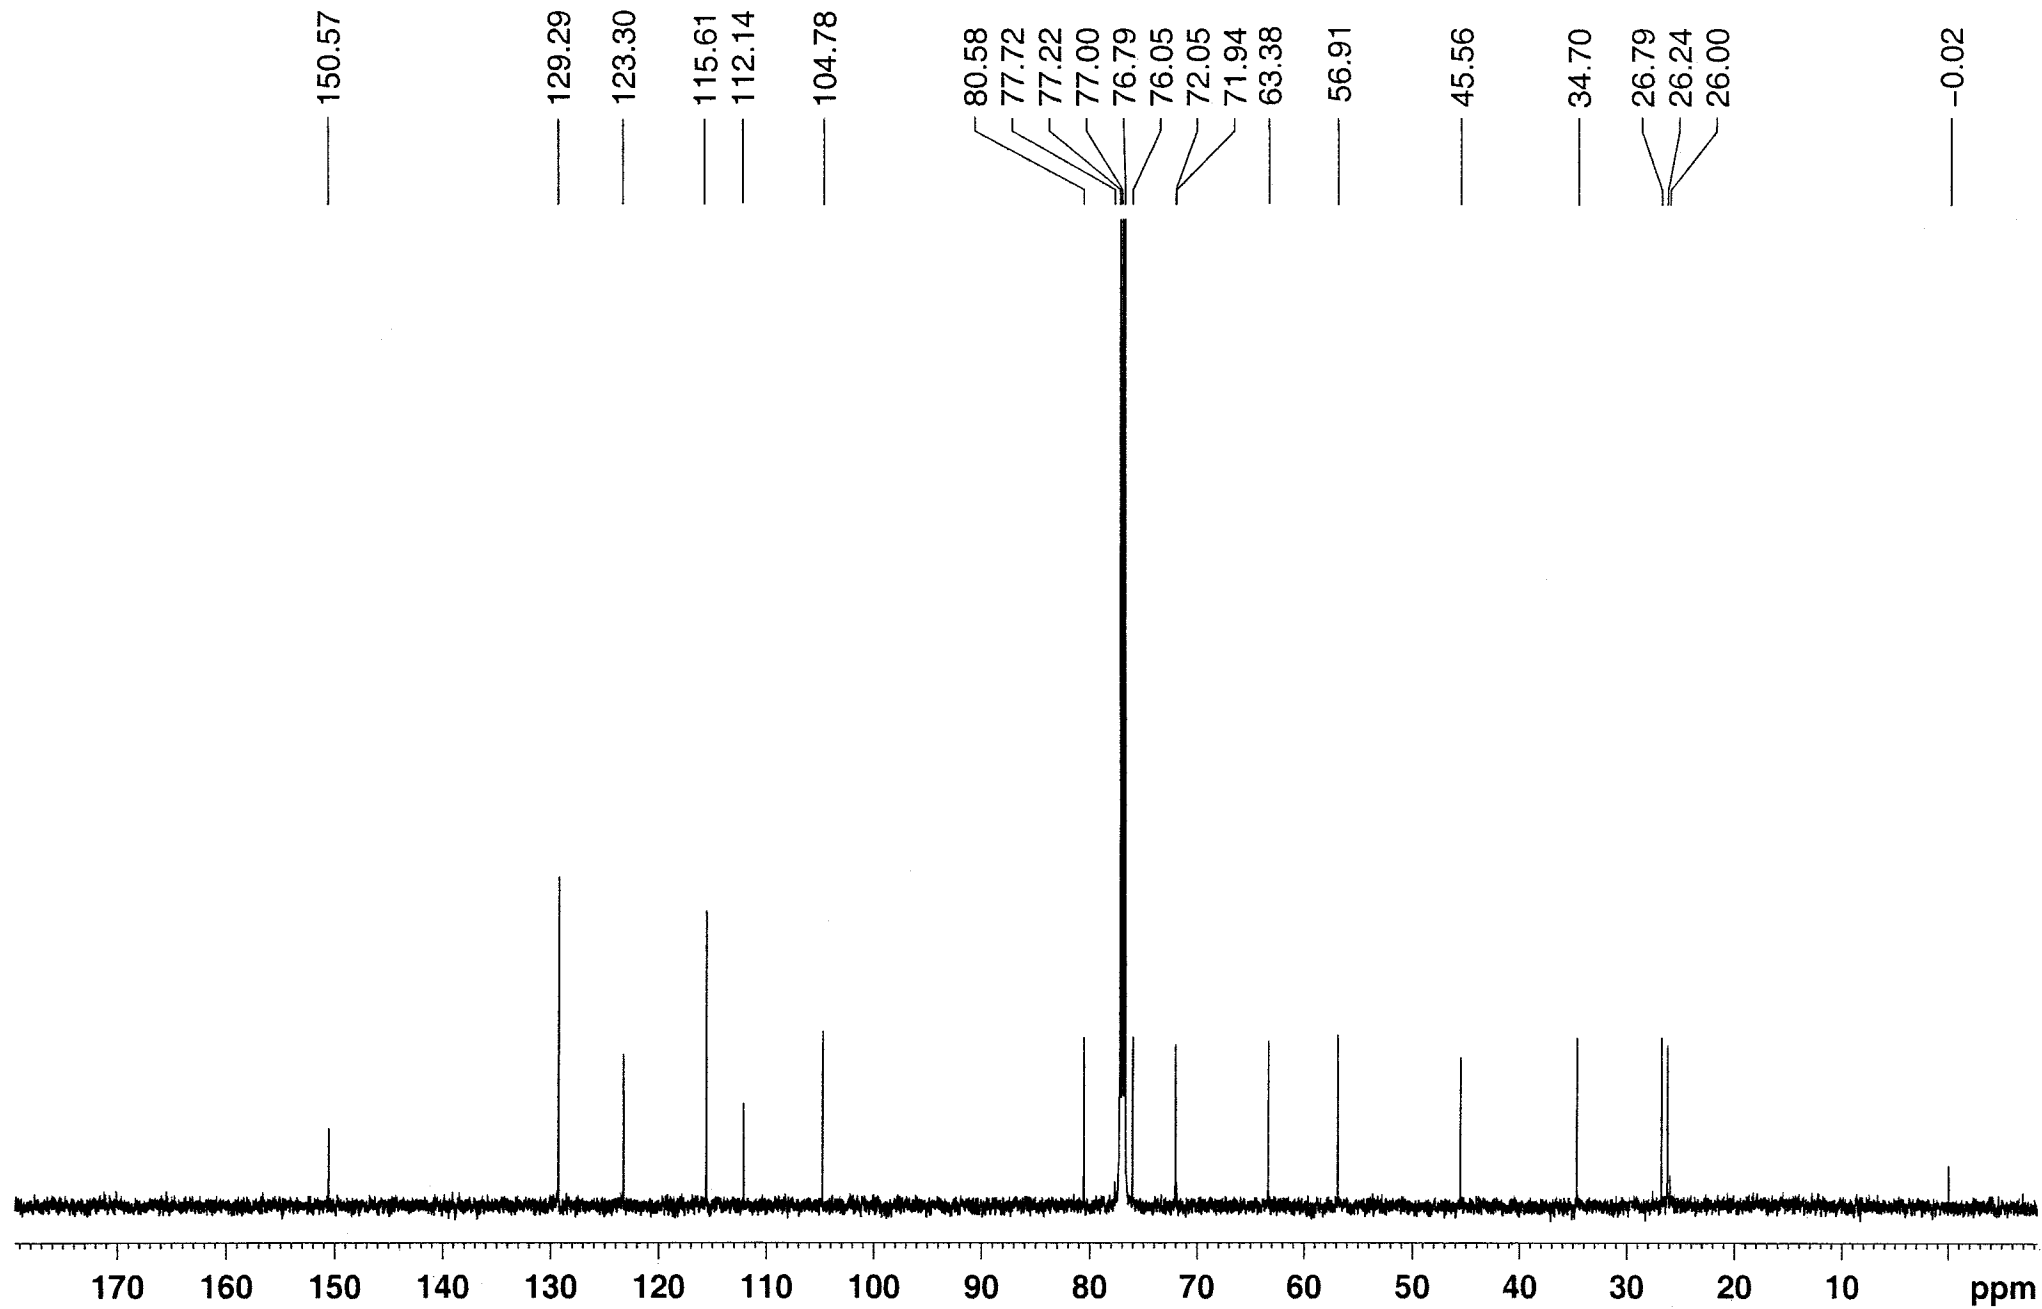

<sup>1</sup>H NMR spectrum (CDCl<sub>3</sub>, 600 MHz) of **6**

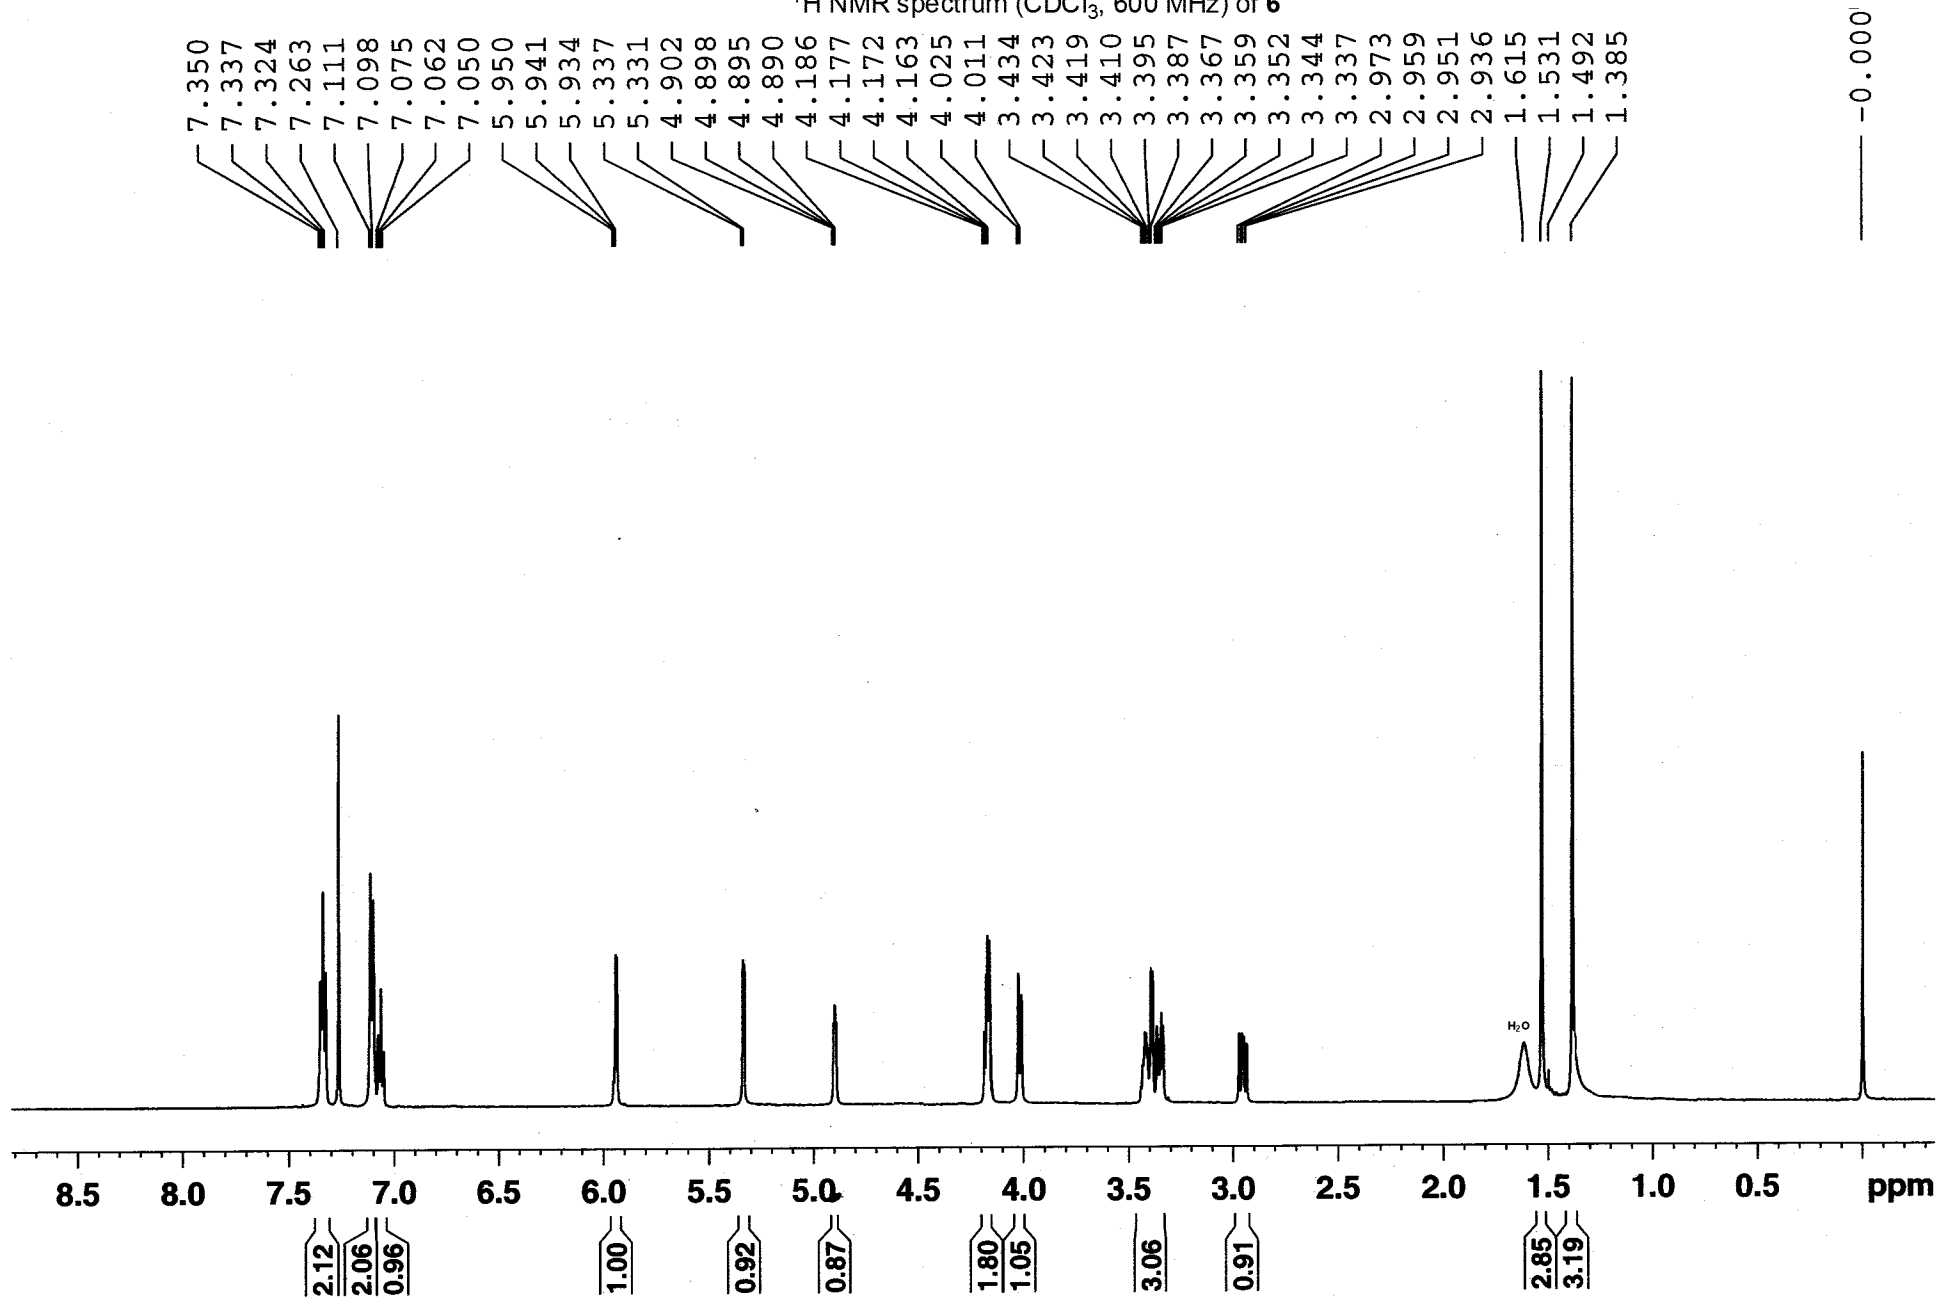

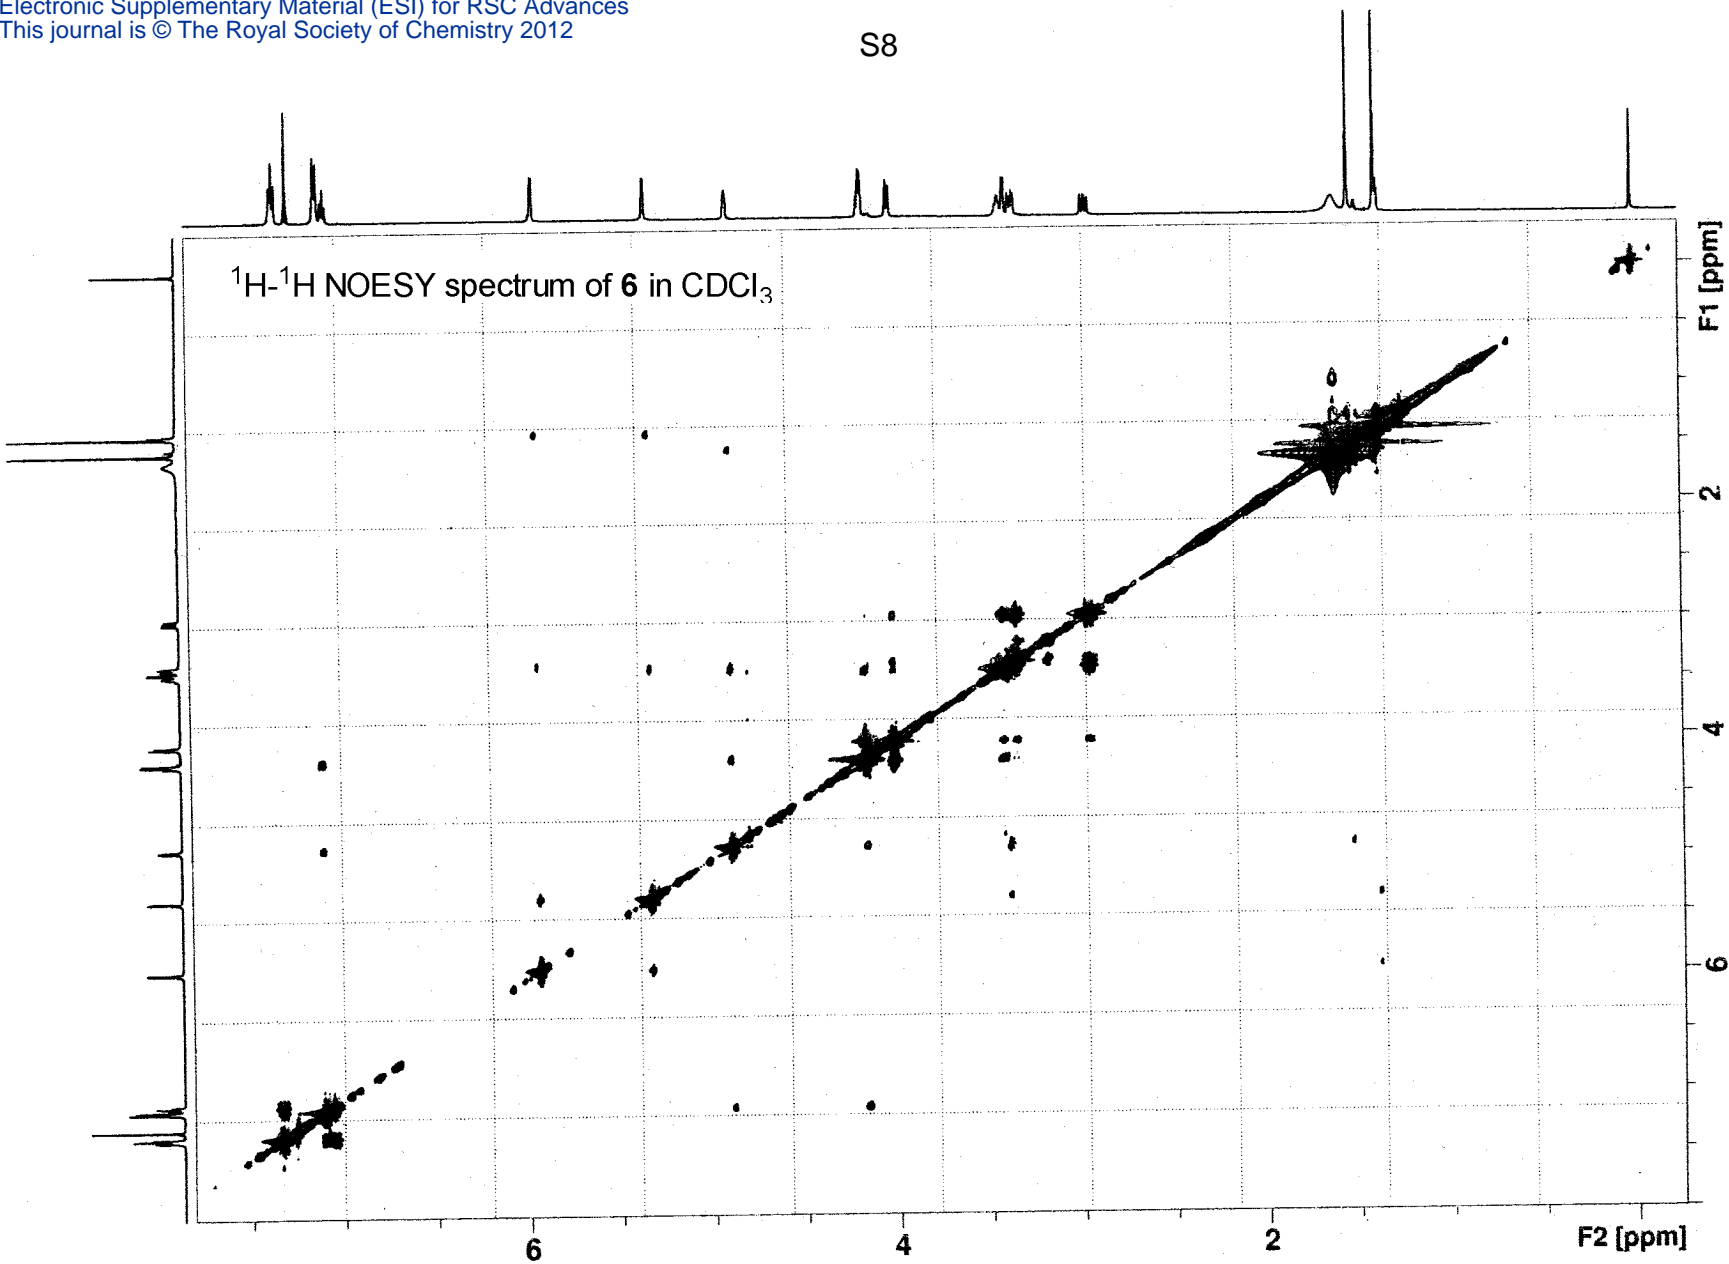



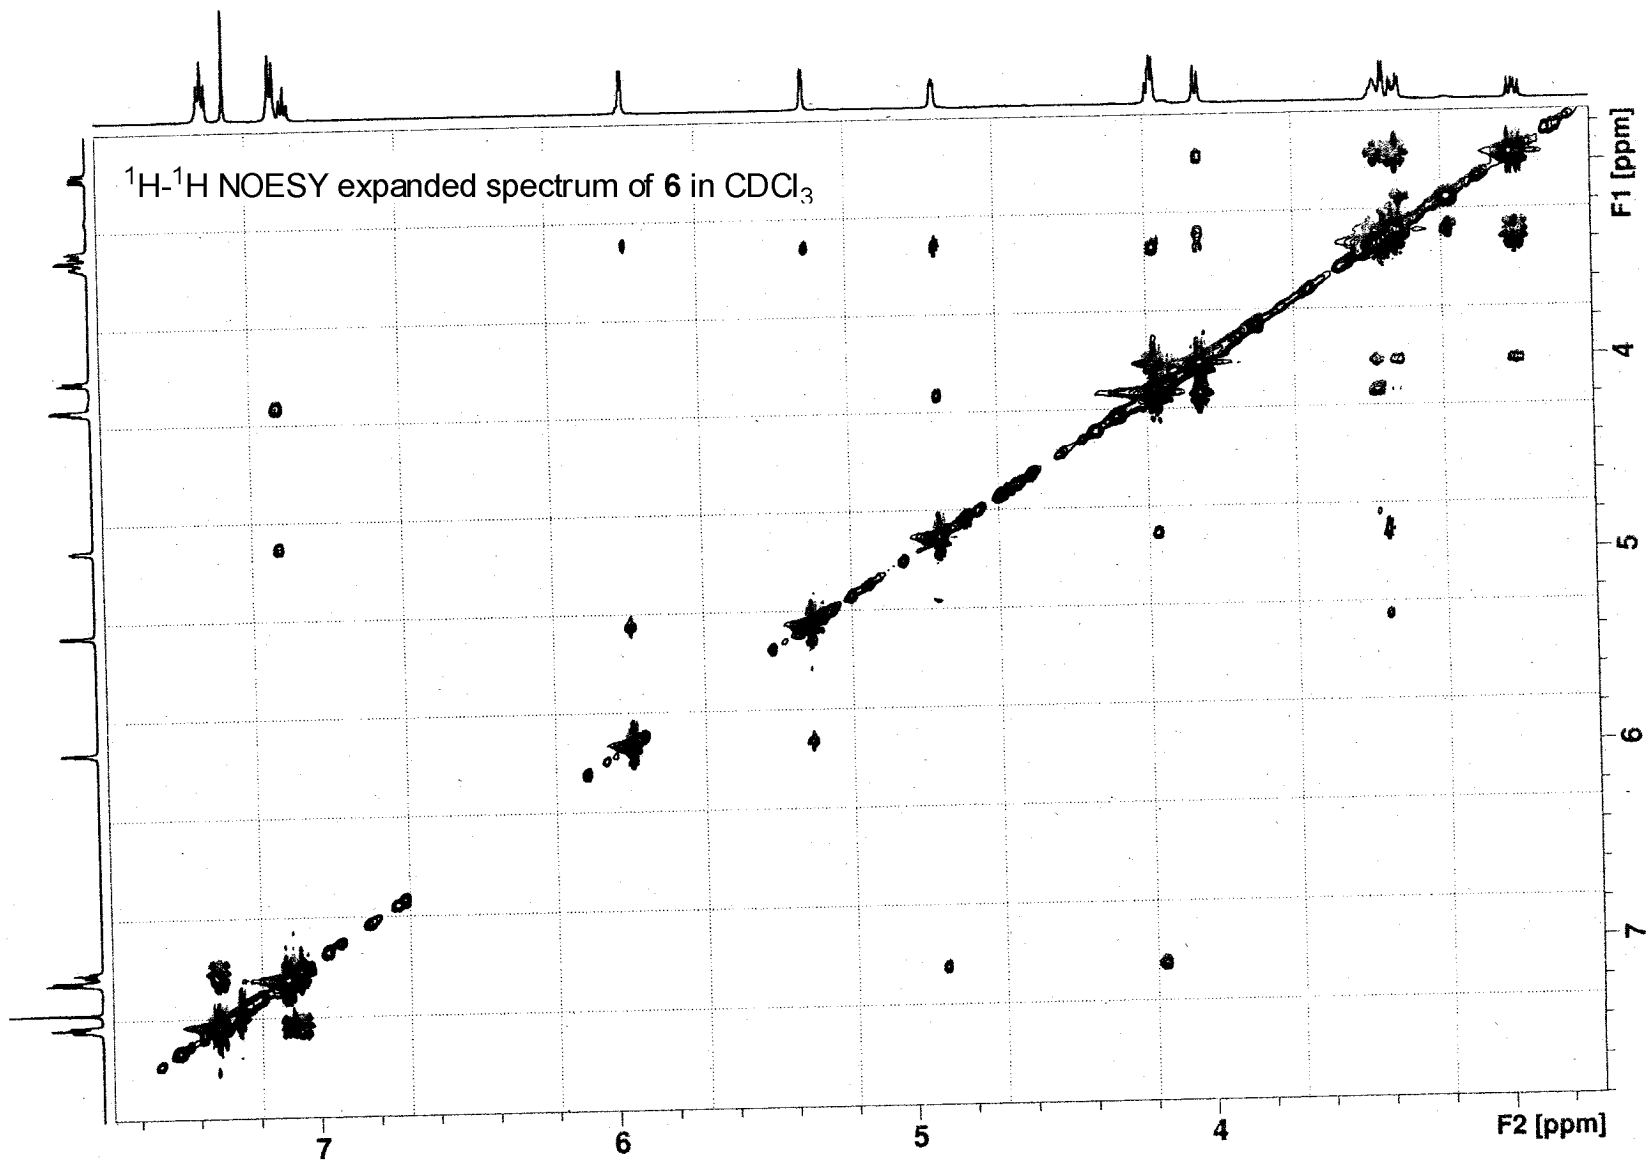

S10

<sup>13</sup>C NMR spectrum (CDCl<sub>3</sub>, 150 MHz) of 7

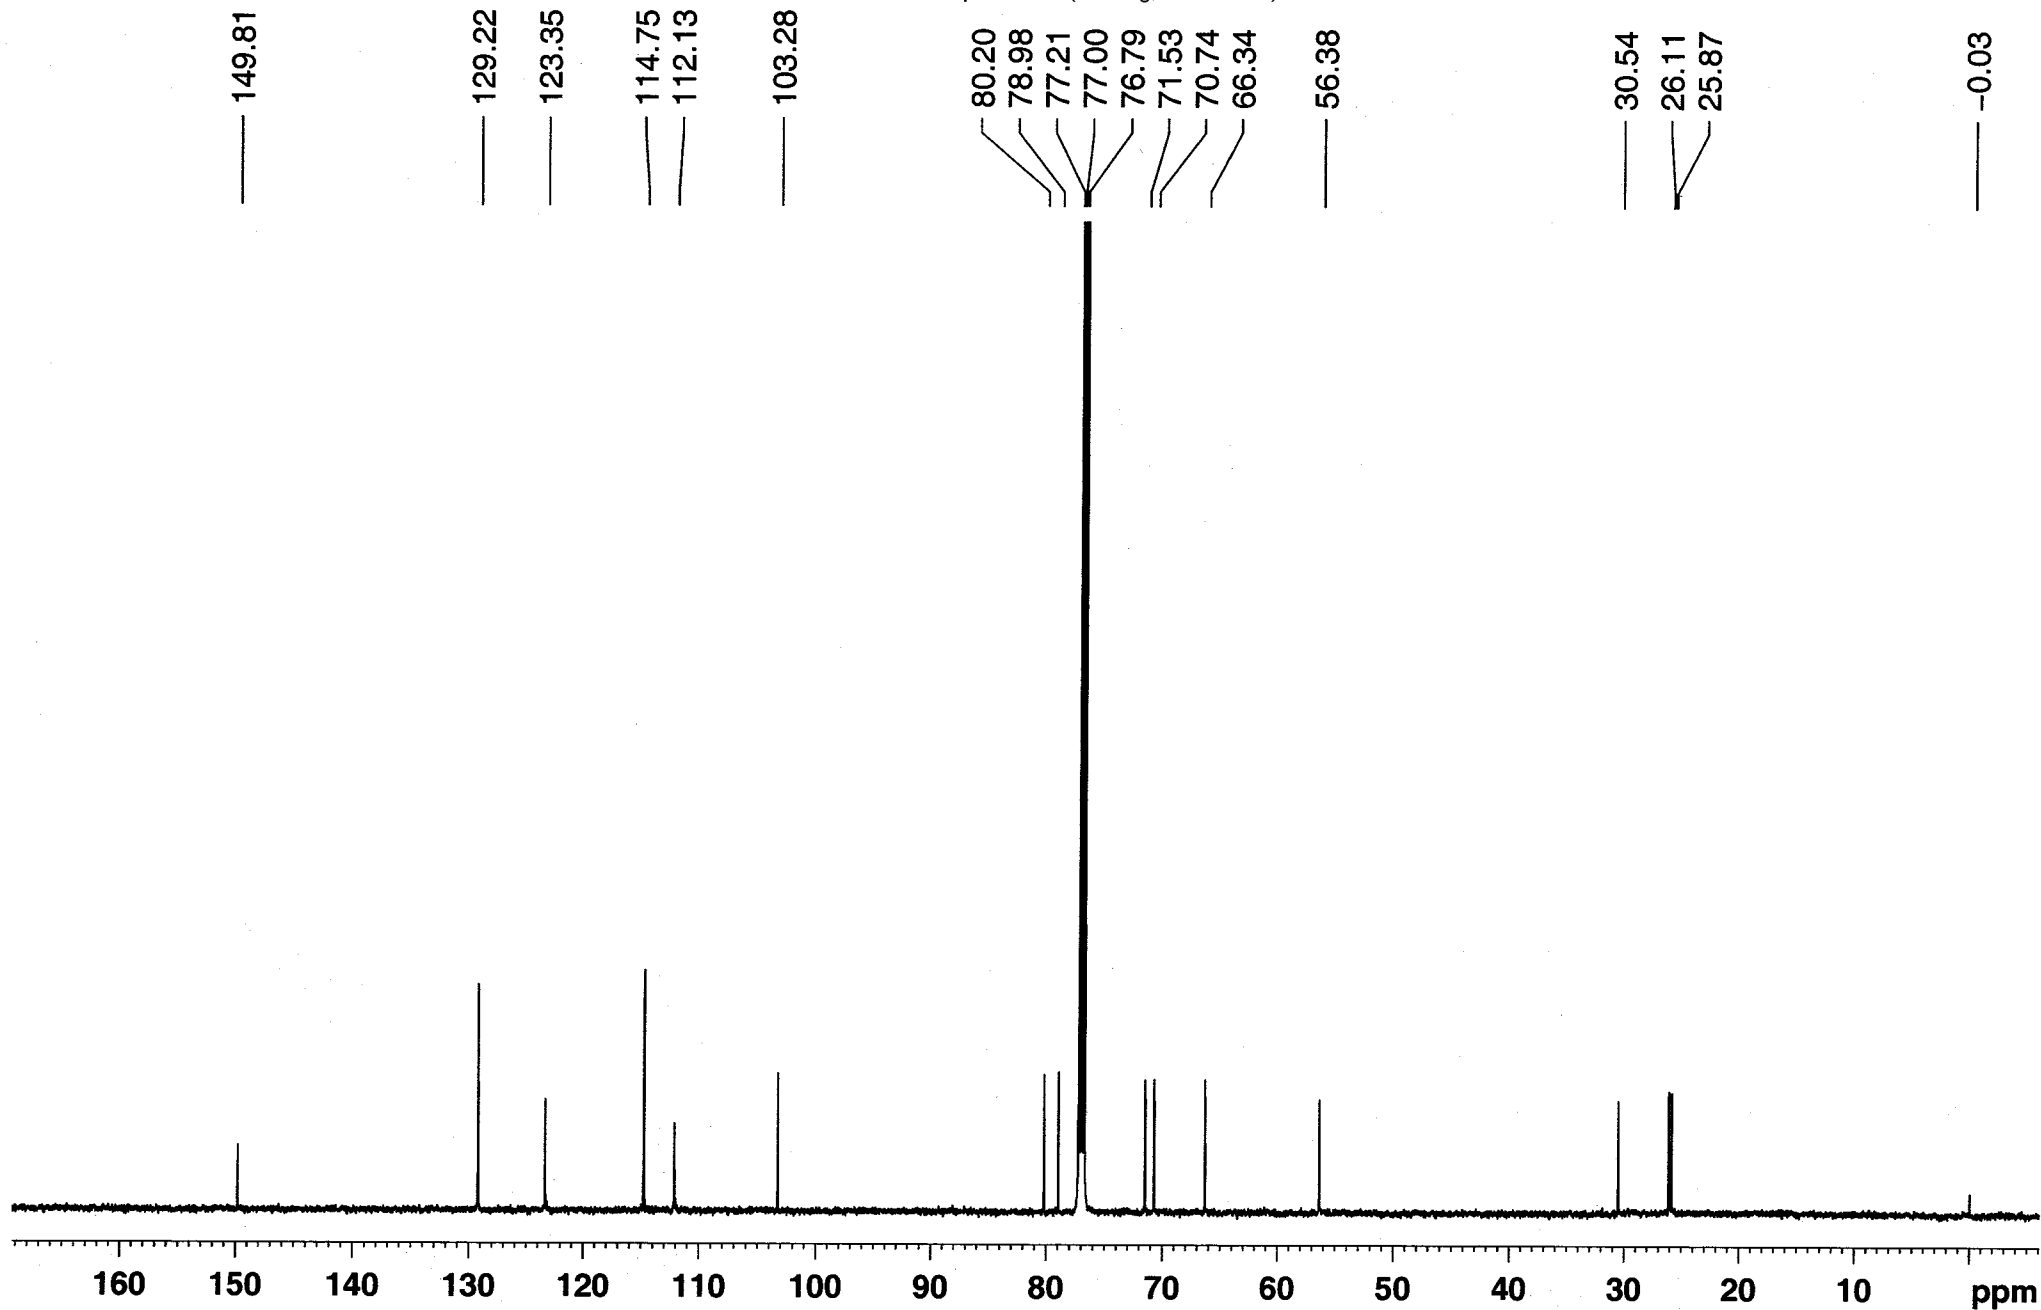

<sup>1</sup>H NMR spectrum (CDCl<sub>3</sub>, 600 MHz) of 7

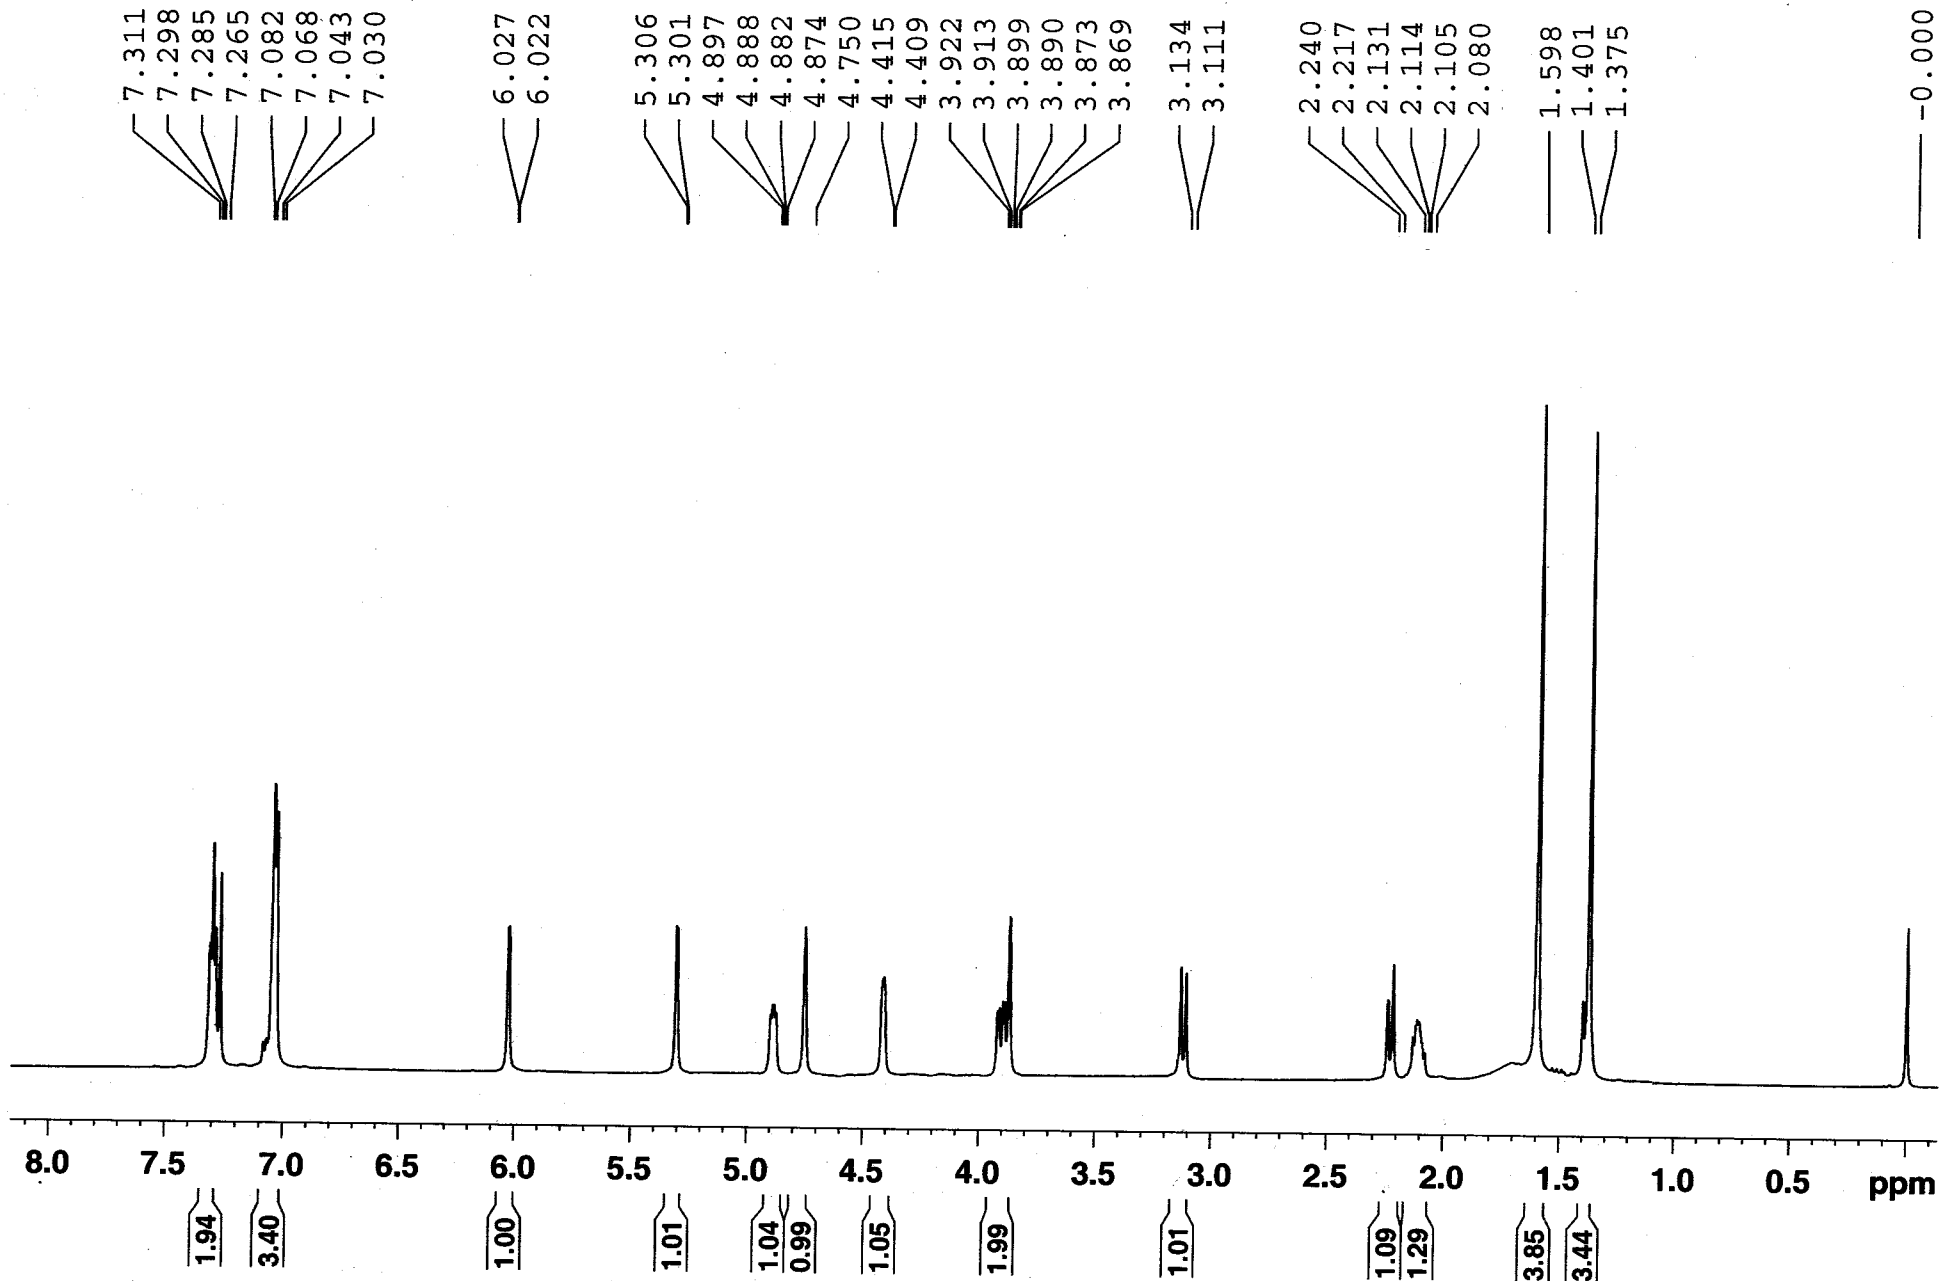

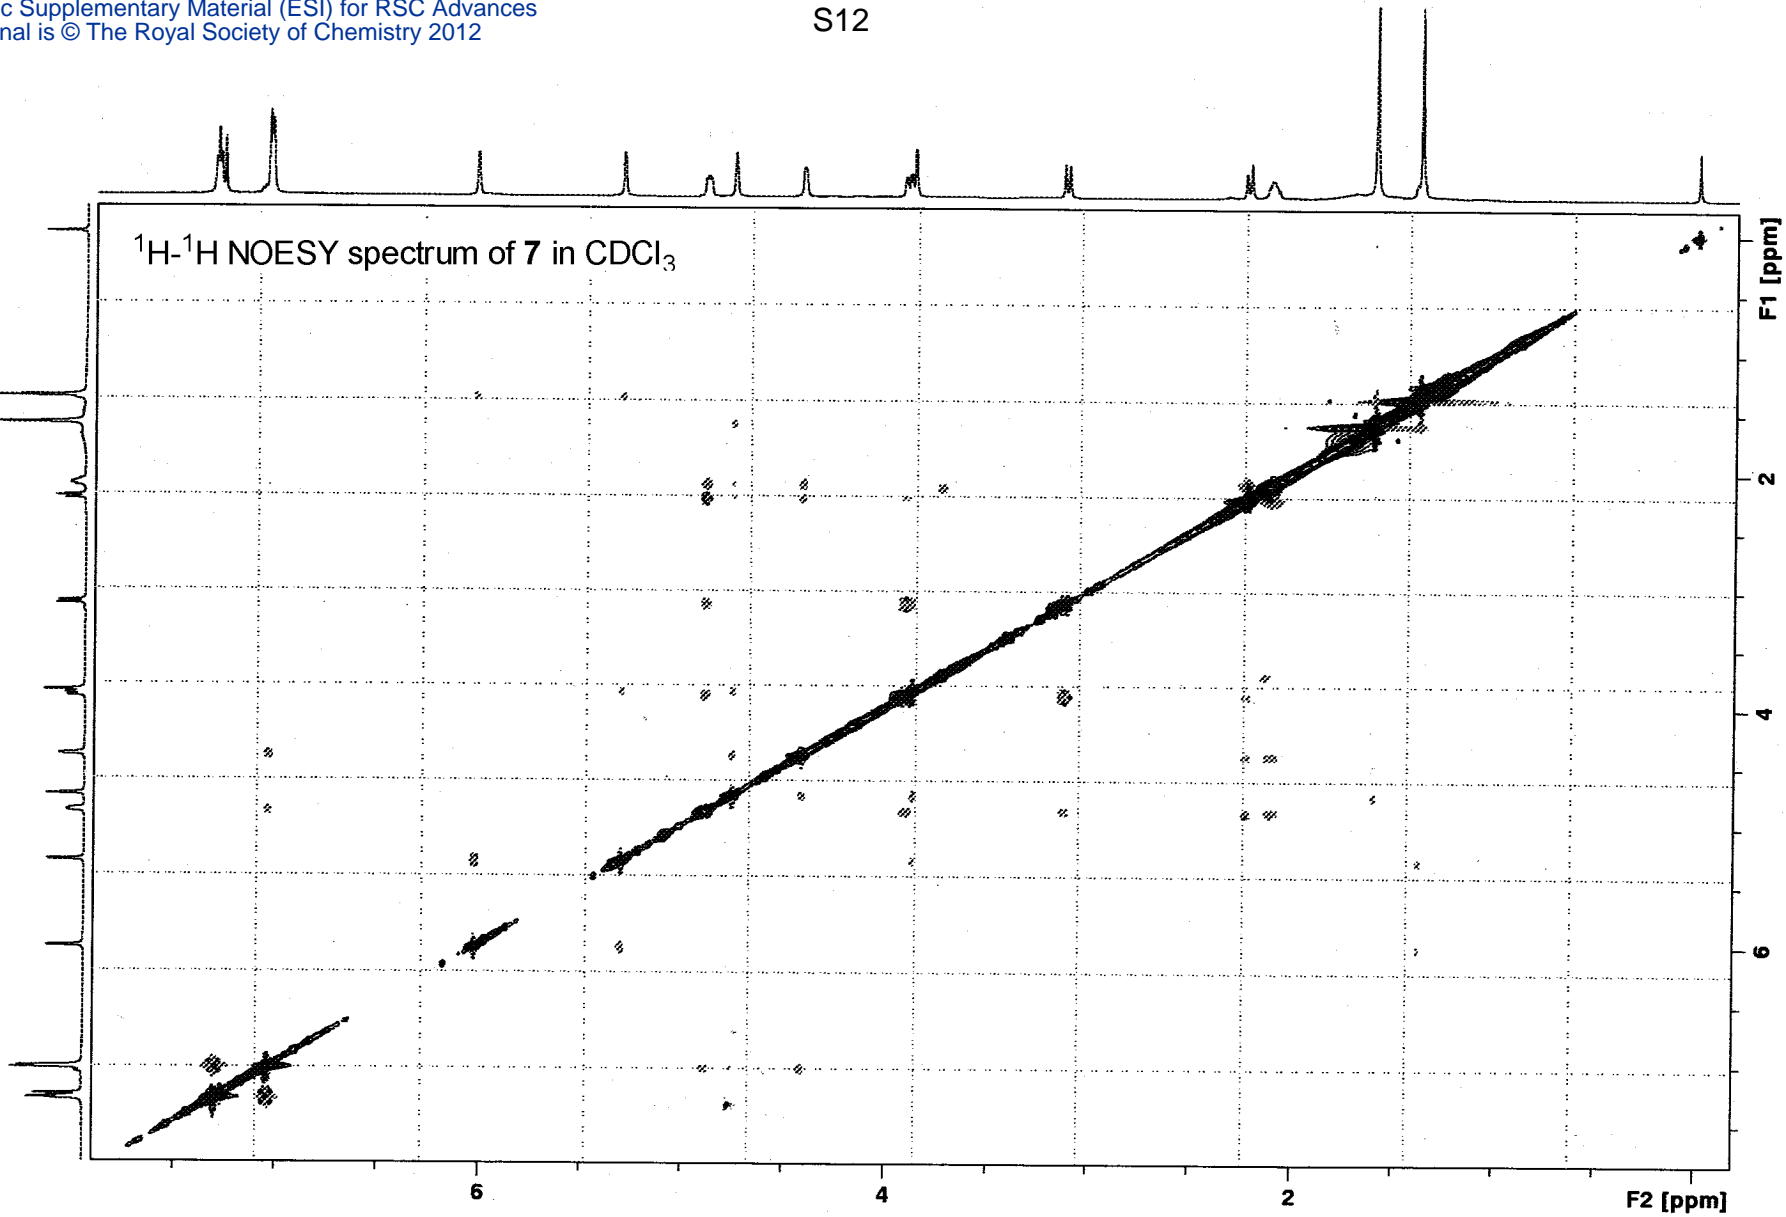

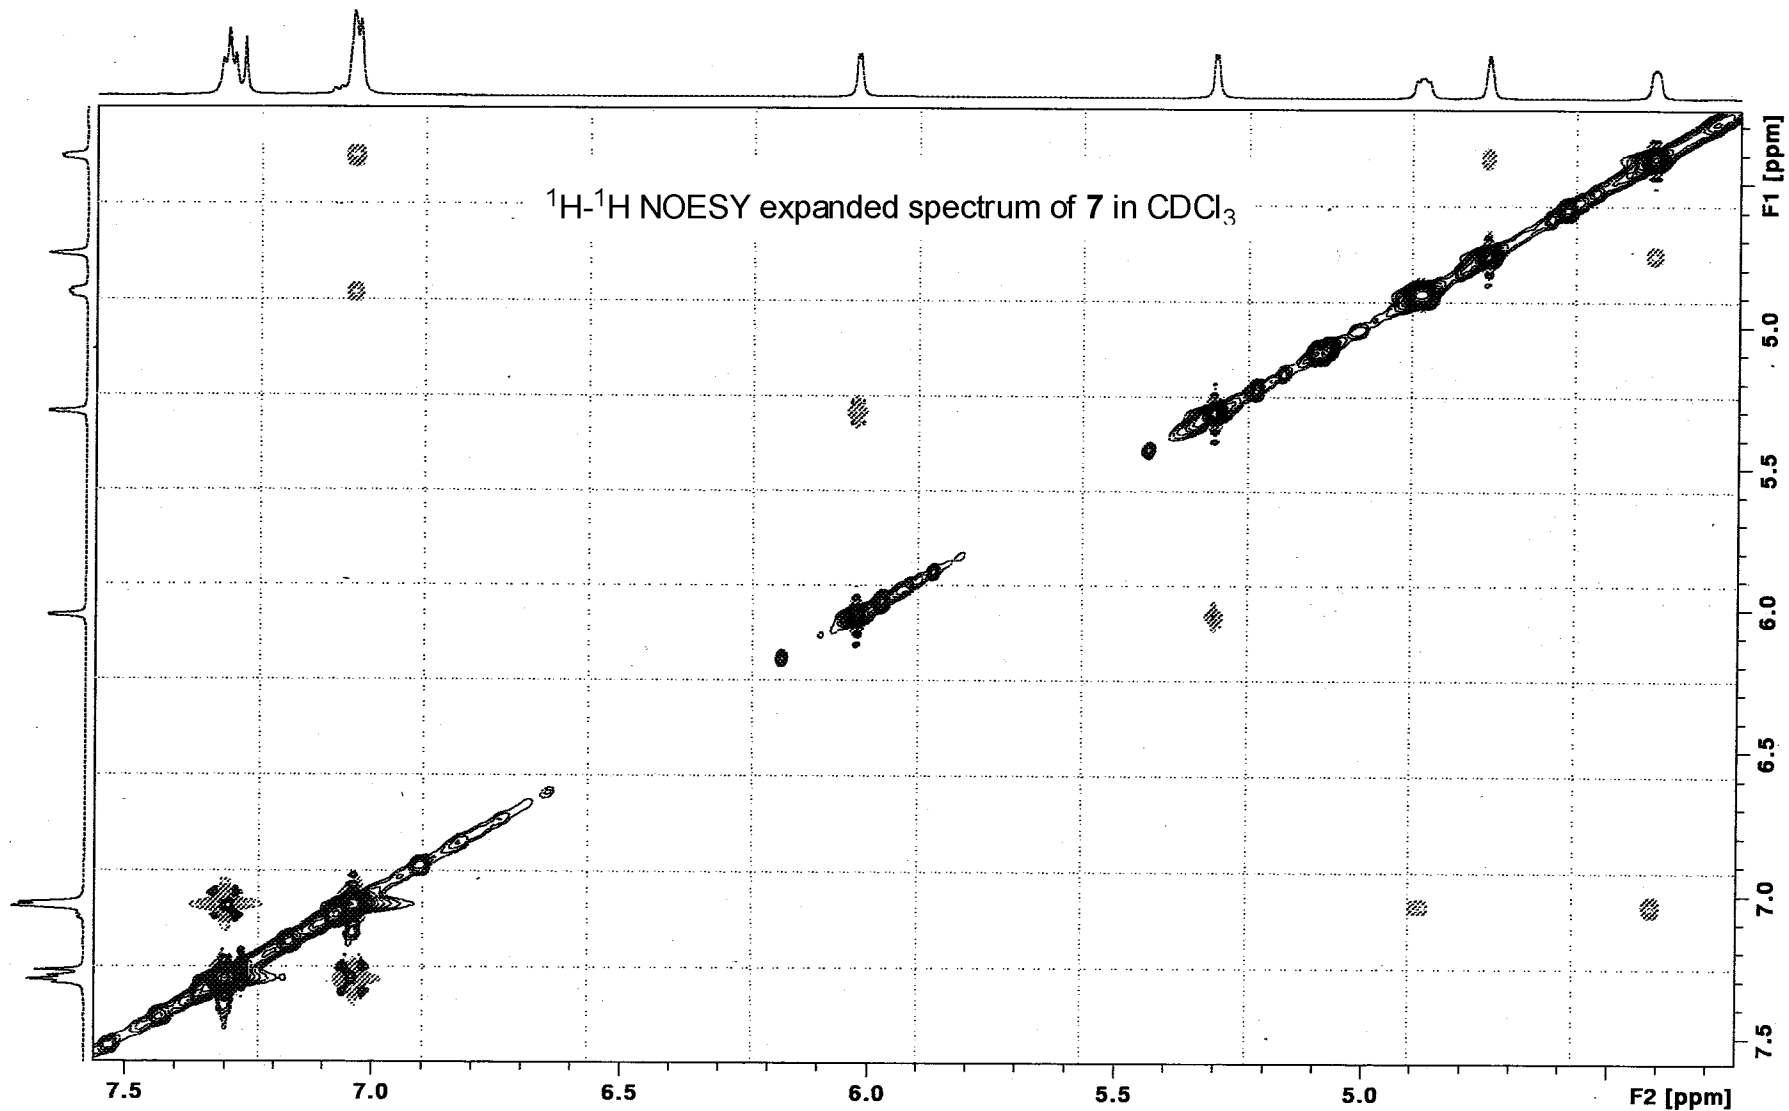

<sup>1</sup>H NMR spectrum (CDCl<sub>3</sub>, 600 MHz) of 8

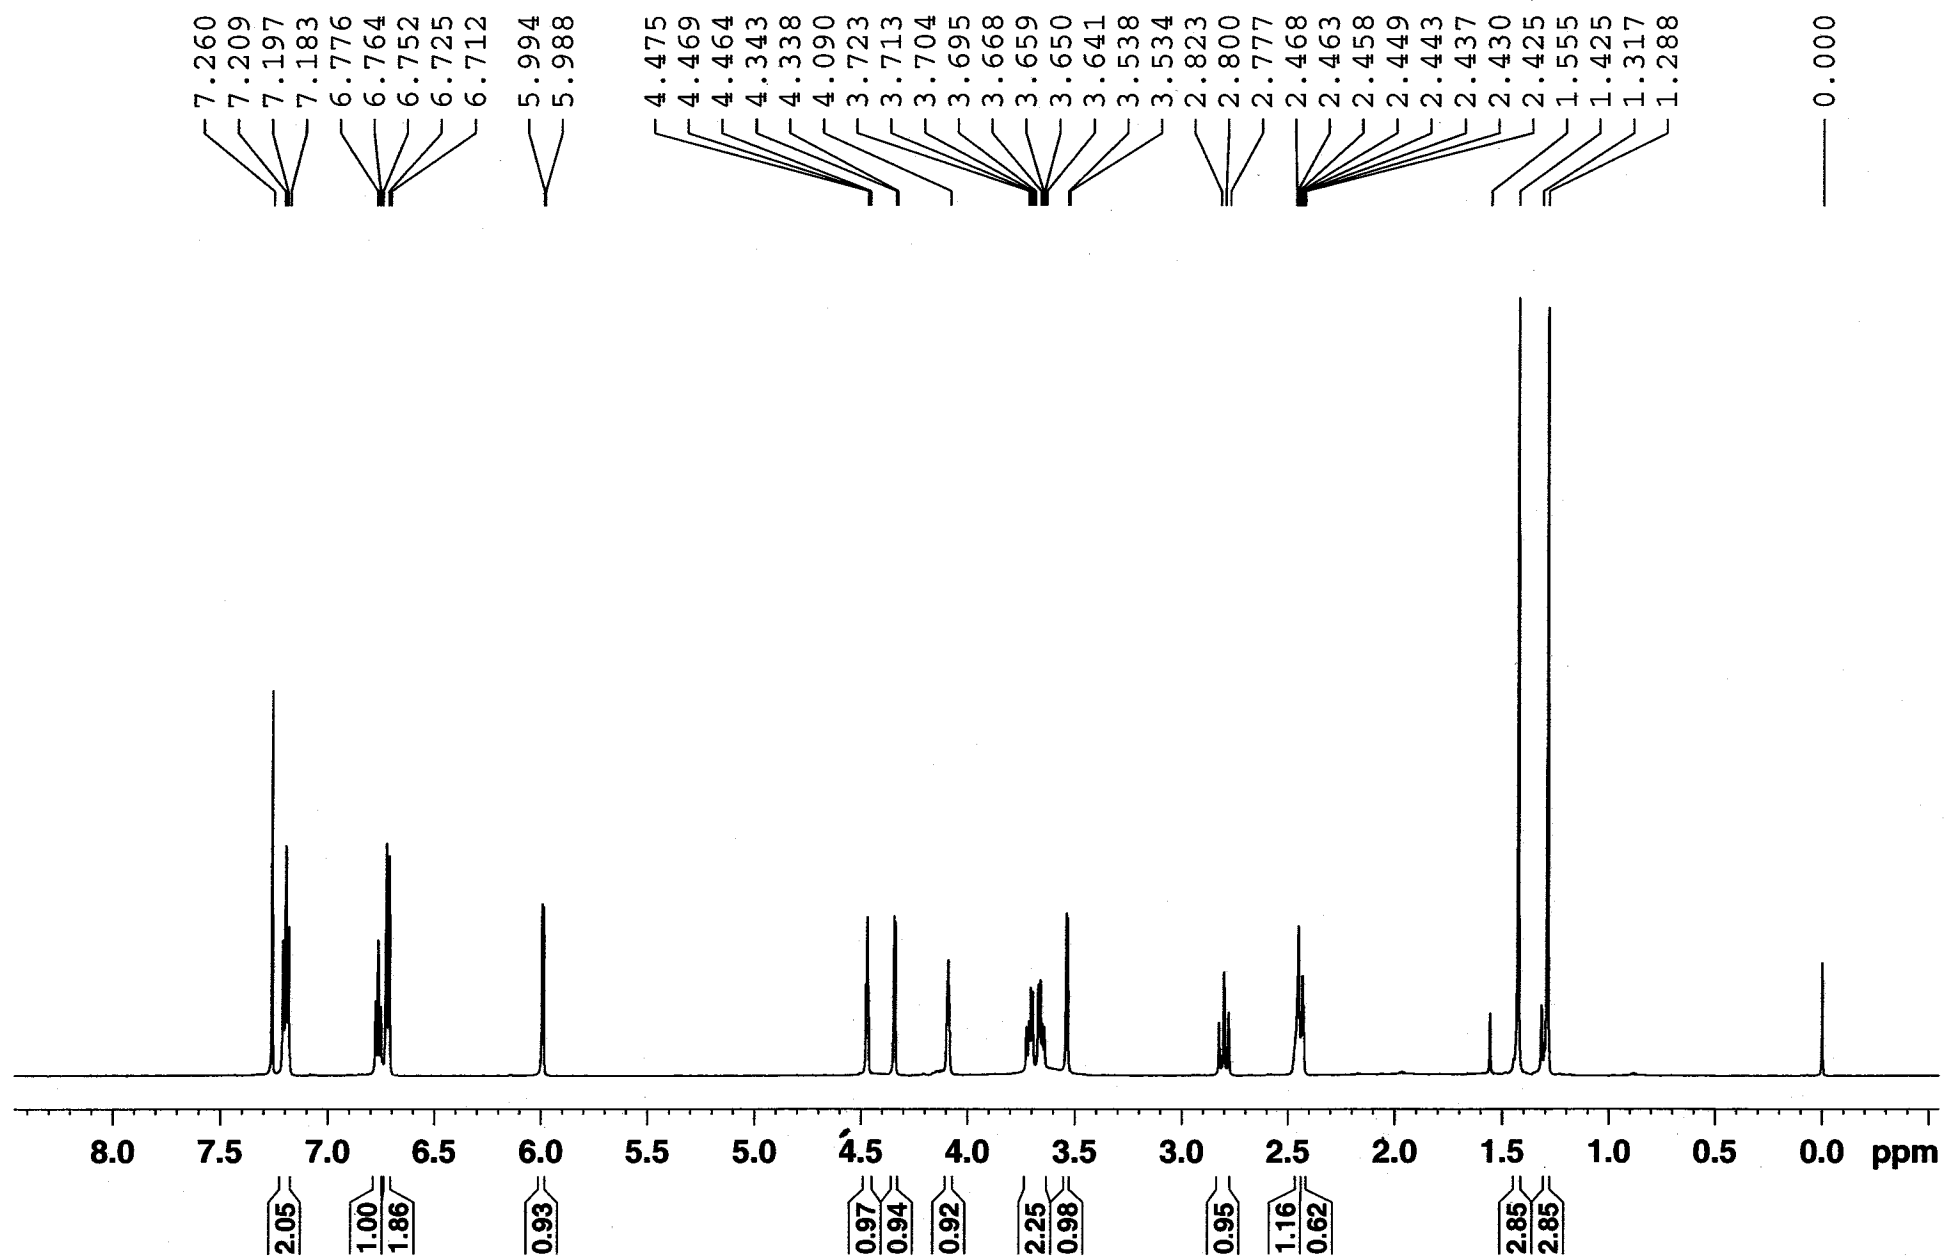

$^{13}\text{C}$  NMR spectrum ( $\text{CDCl}_3$ , 75 MHz) of **9**

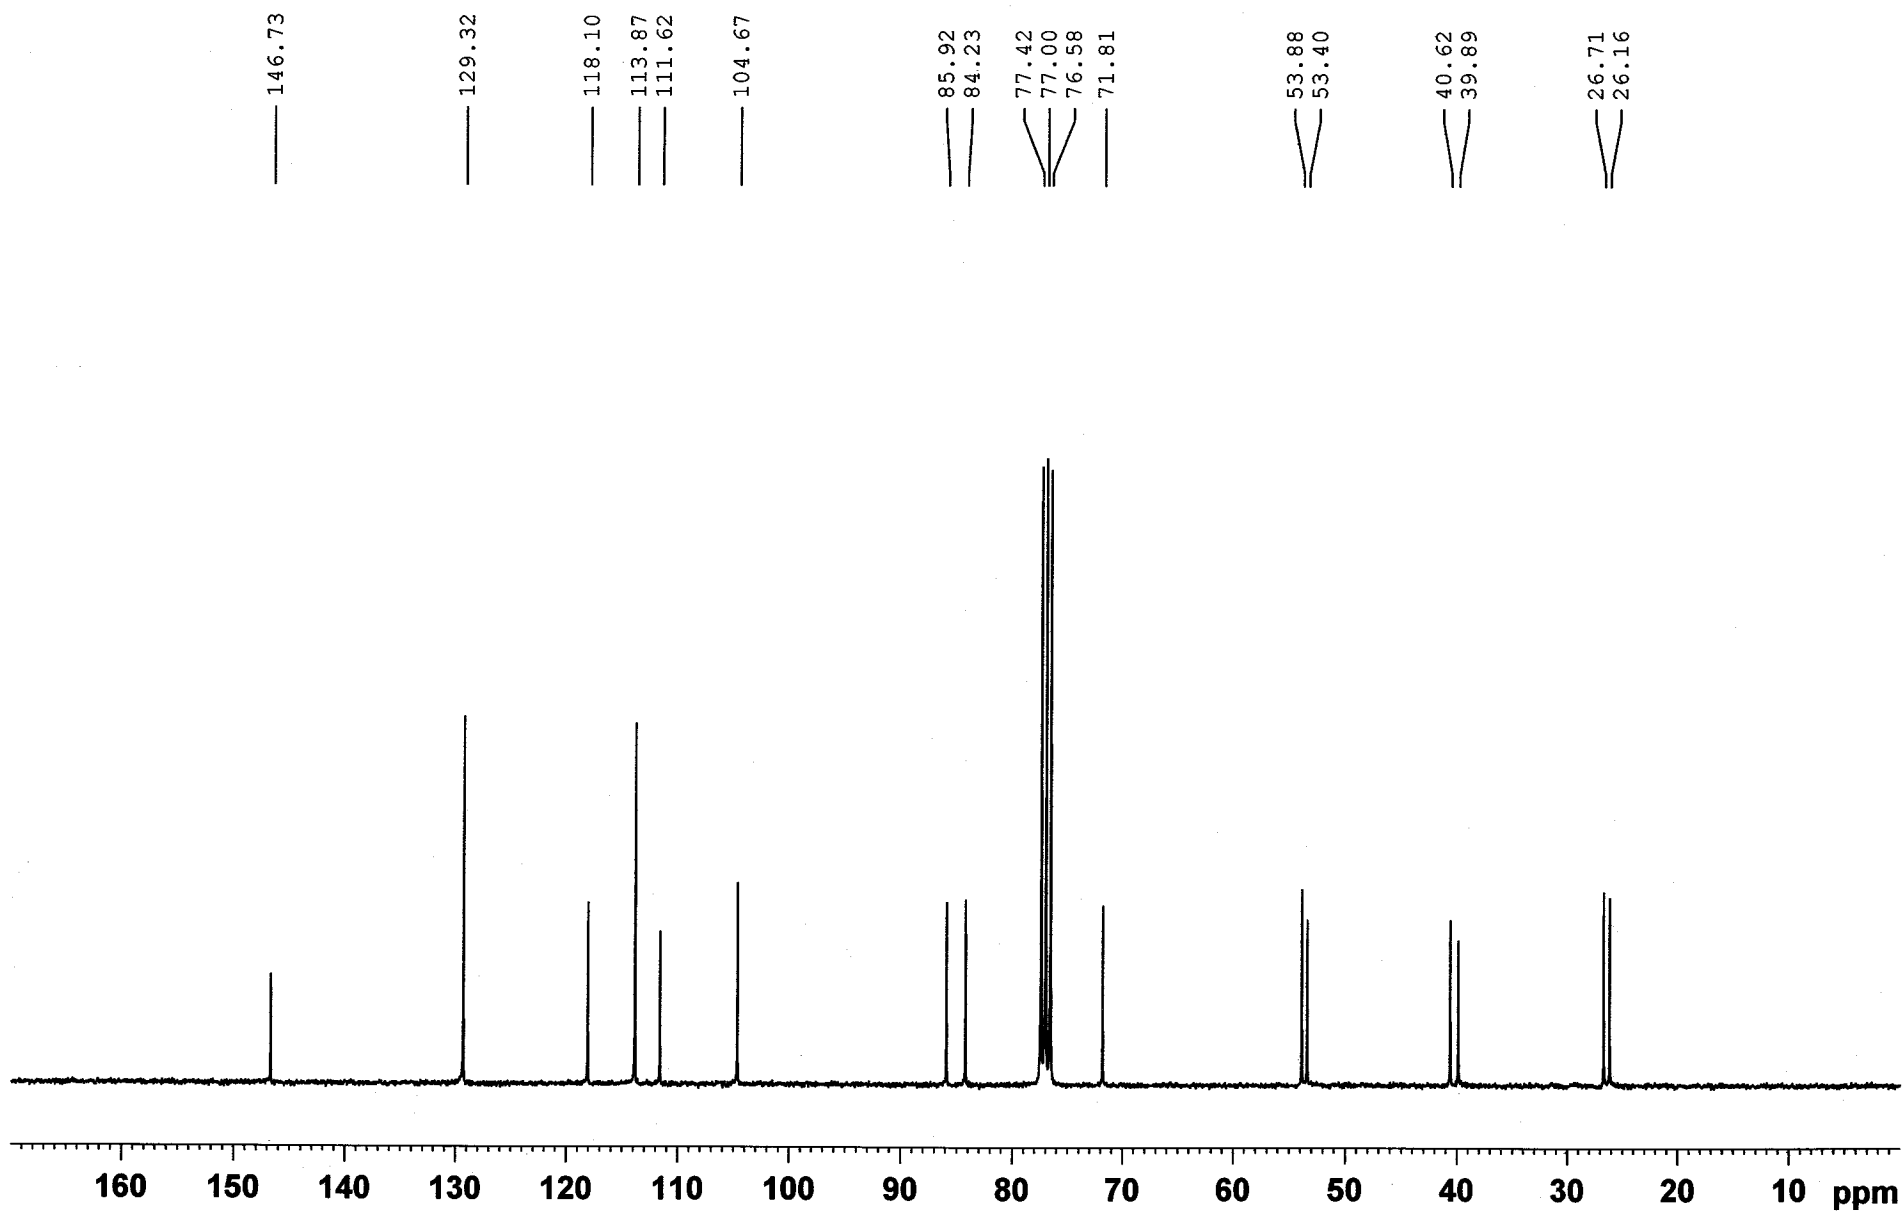

$^1\text{H}$  NMR spectrum ( $\text{CDCl}_3$ , 300 MHz) of **9**

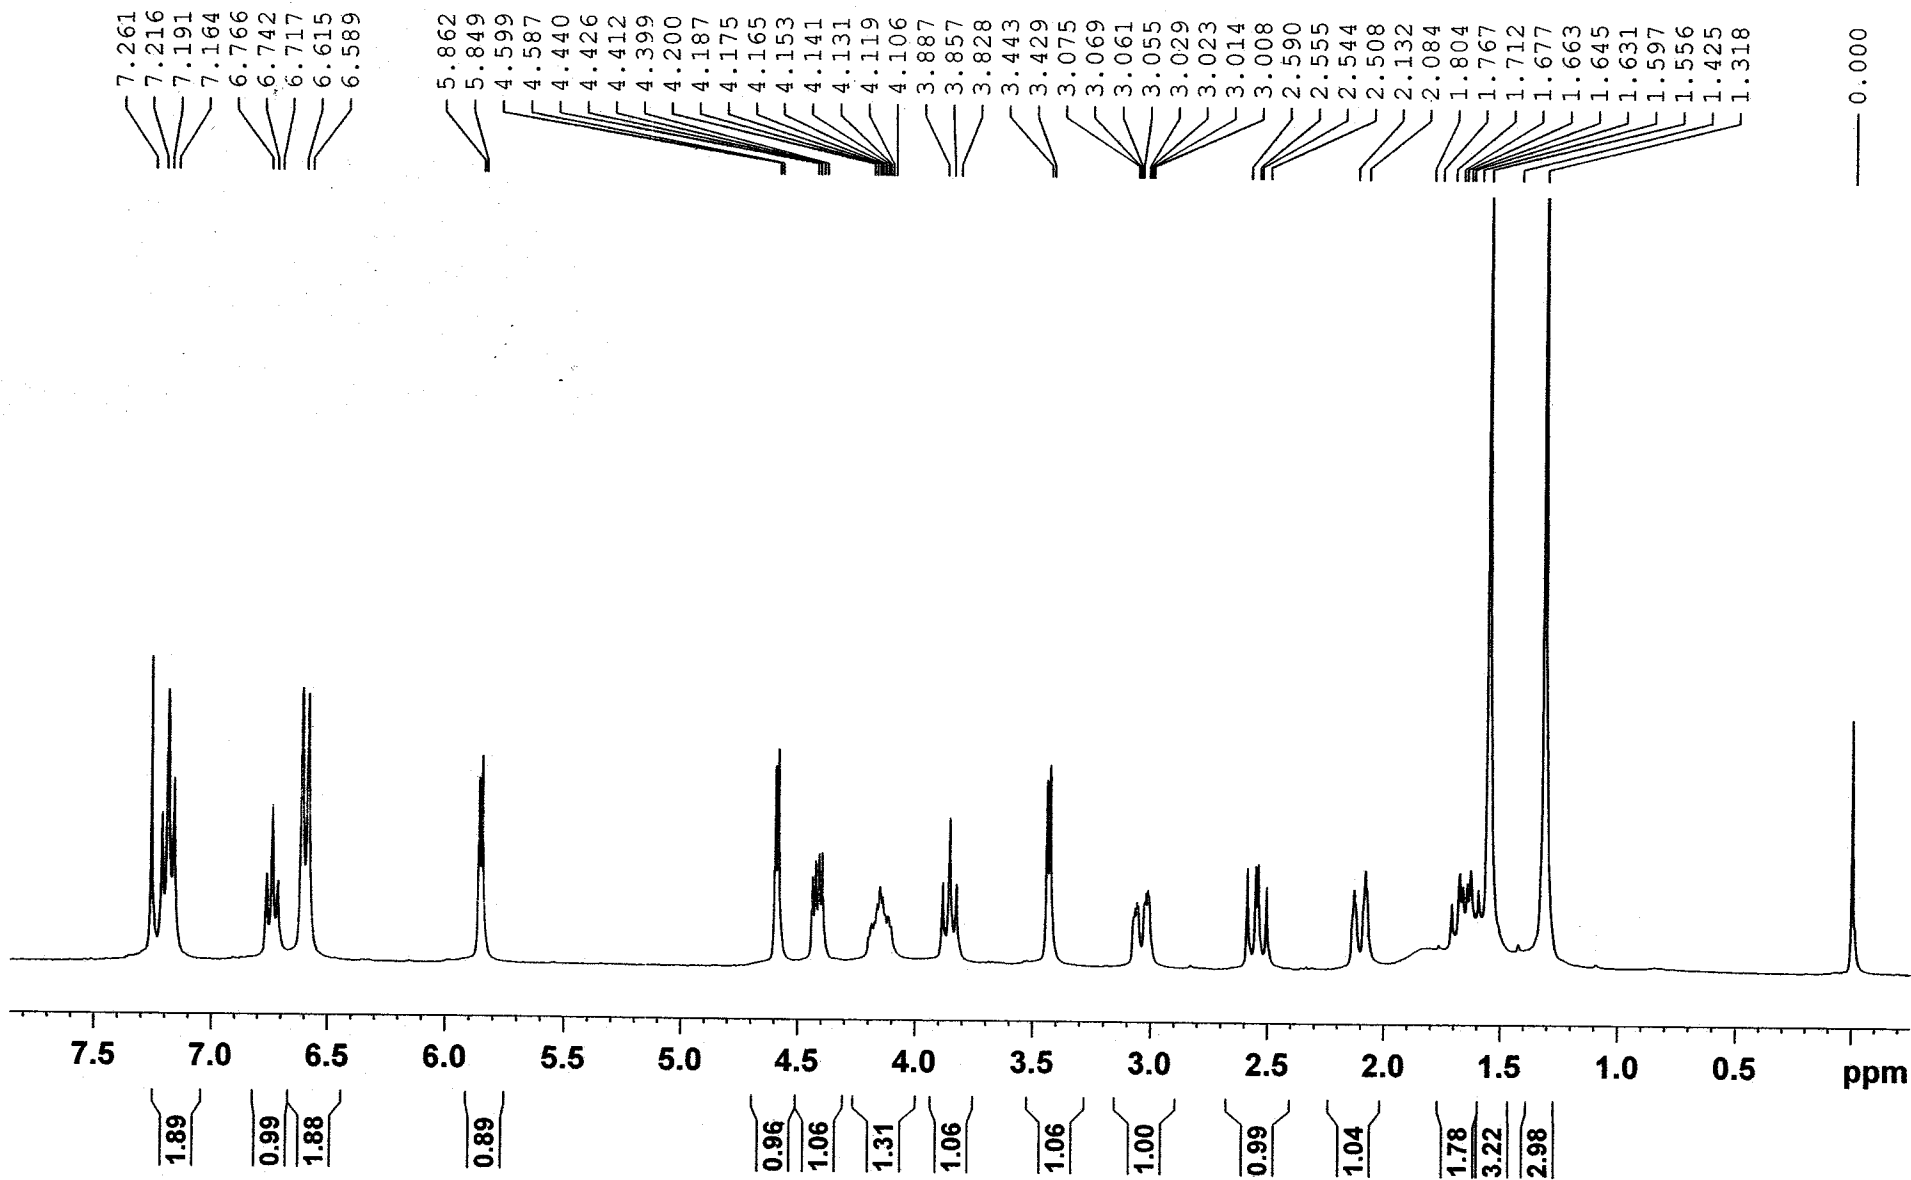



S17

$^{13}\text{C}$  NMR spectrum ( $\text{CDCl}_3$ , 75 MHz) of **12**

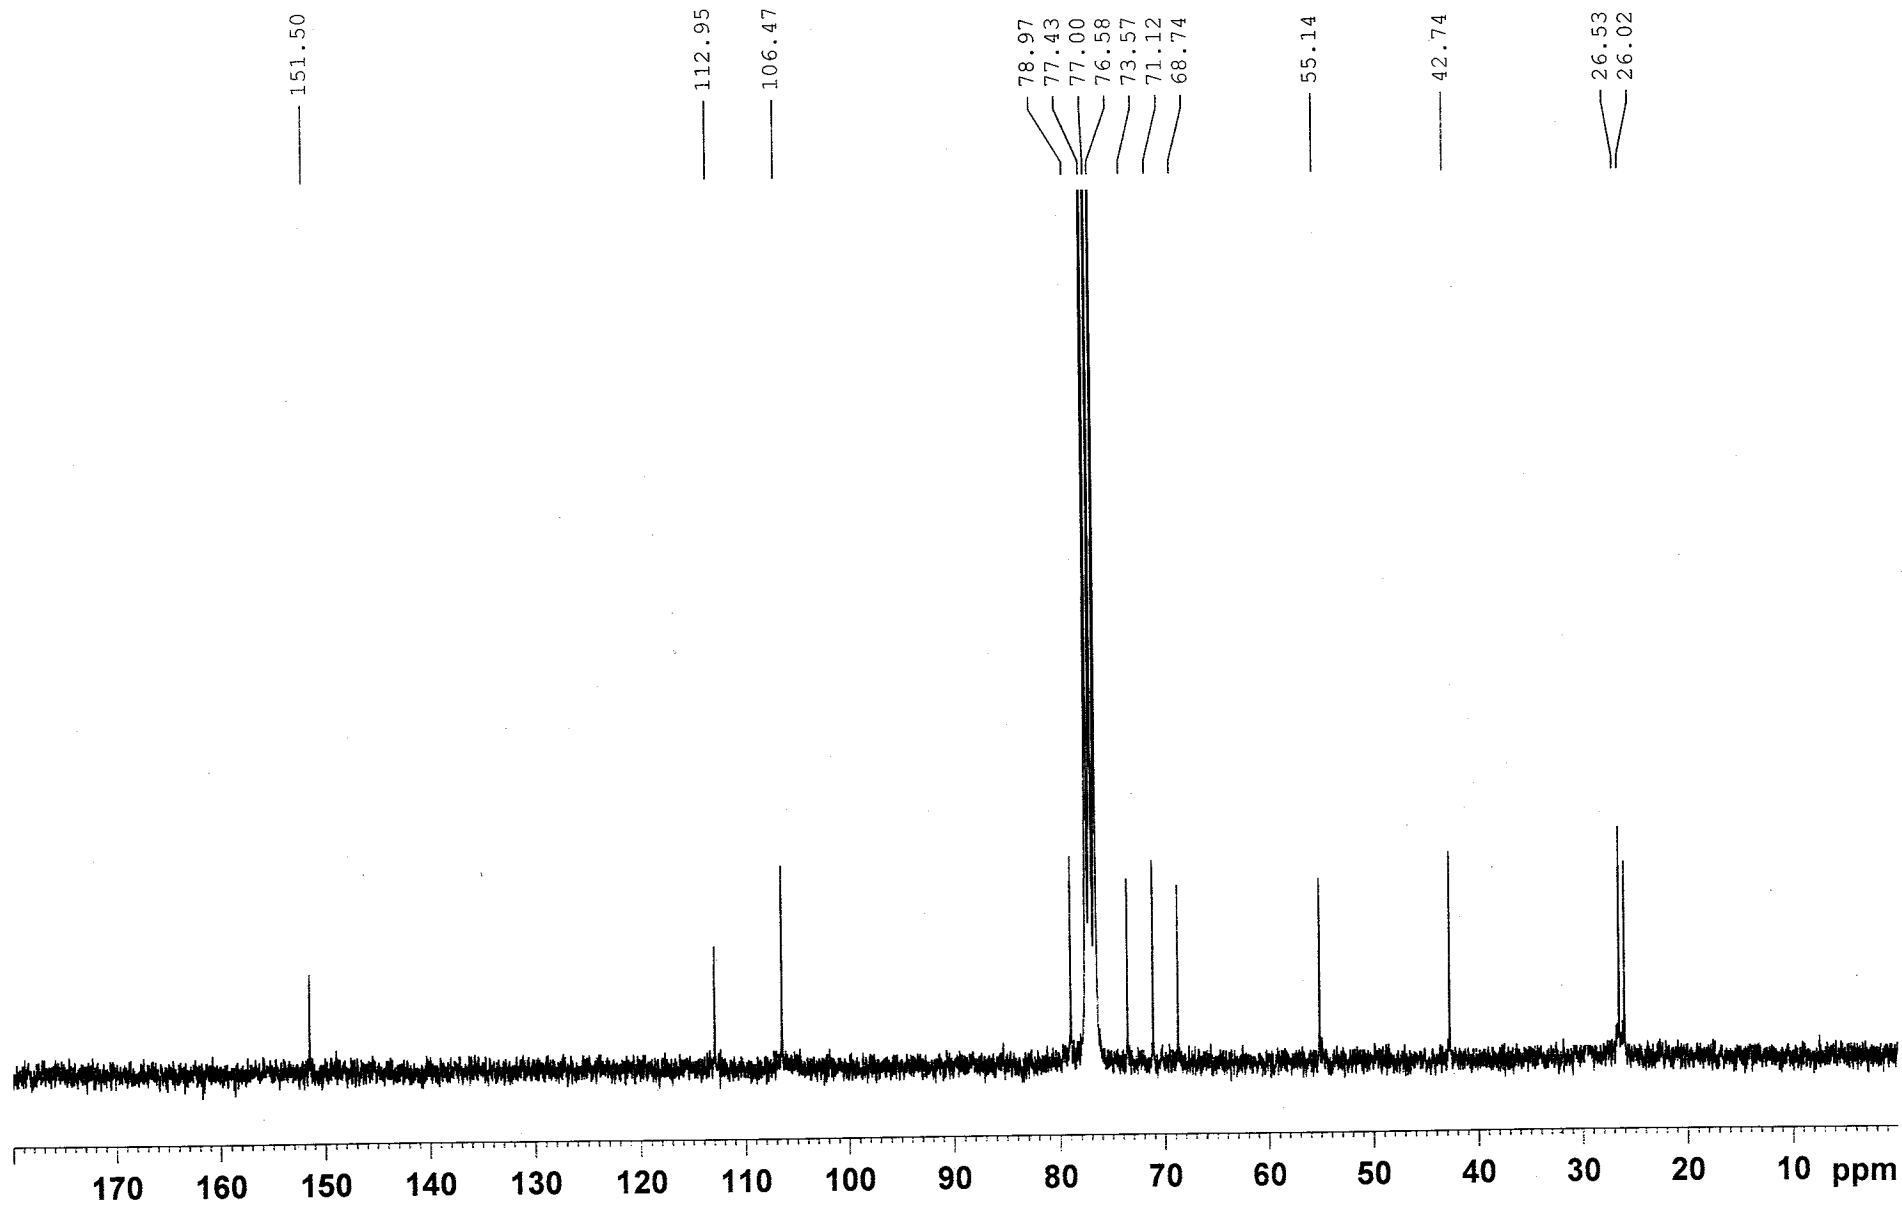

<sup>1</sup>H NMR spectrum (CDCl<sub>3</sub>, 300 MHz) of 12

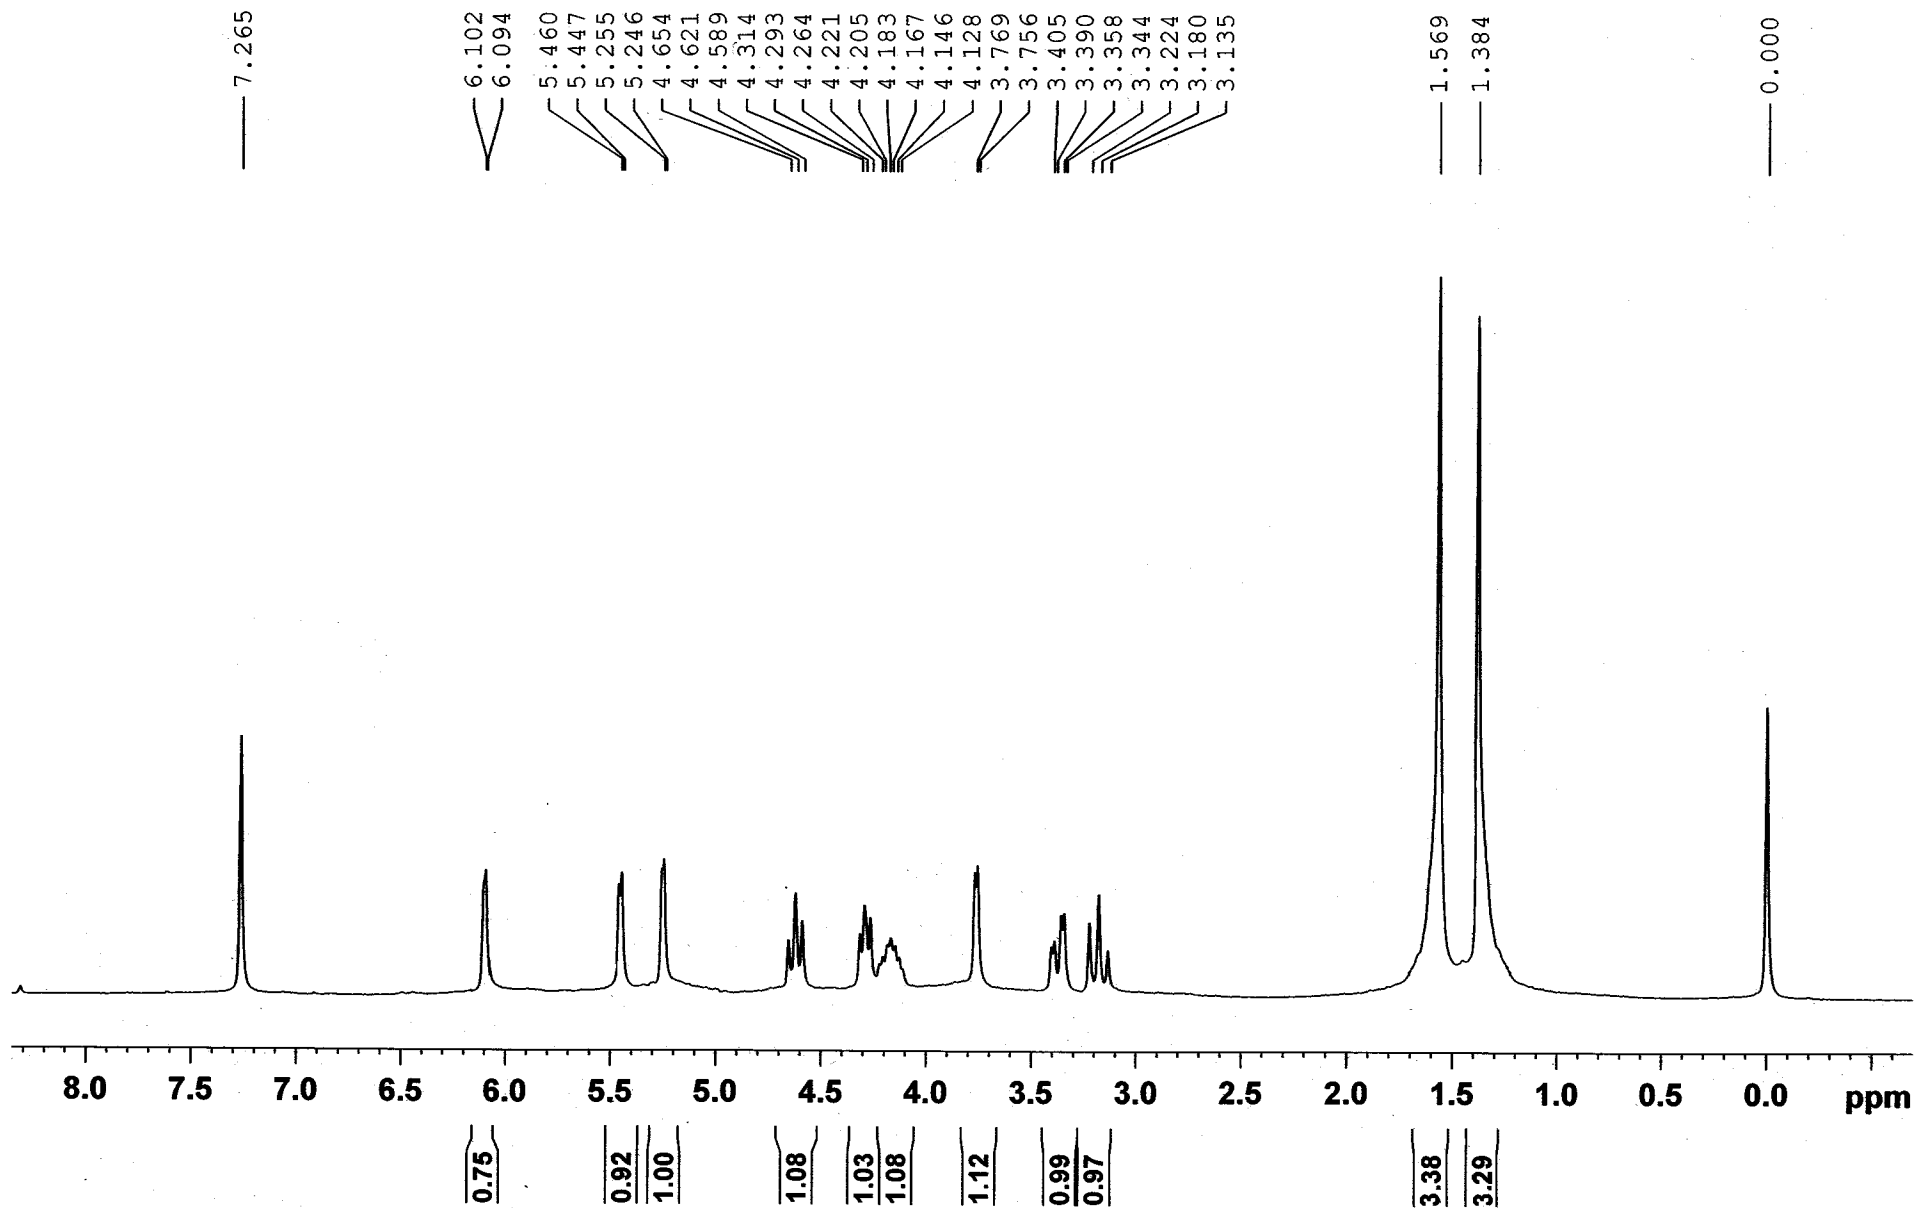

$^{13}\text{C}$  NMR spectrum ( $\text{CDCl}_3$ , 75 MHz) of **13**

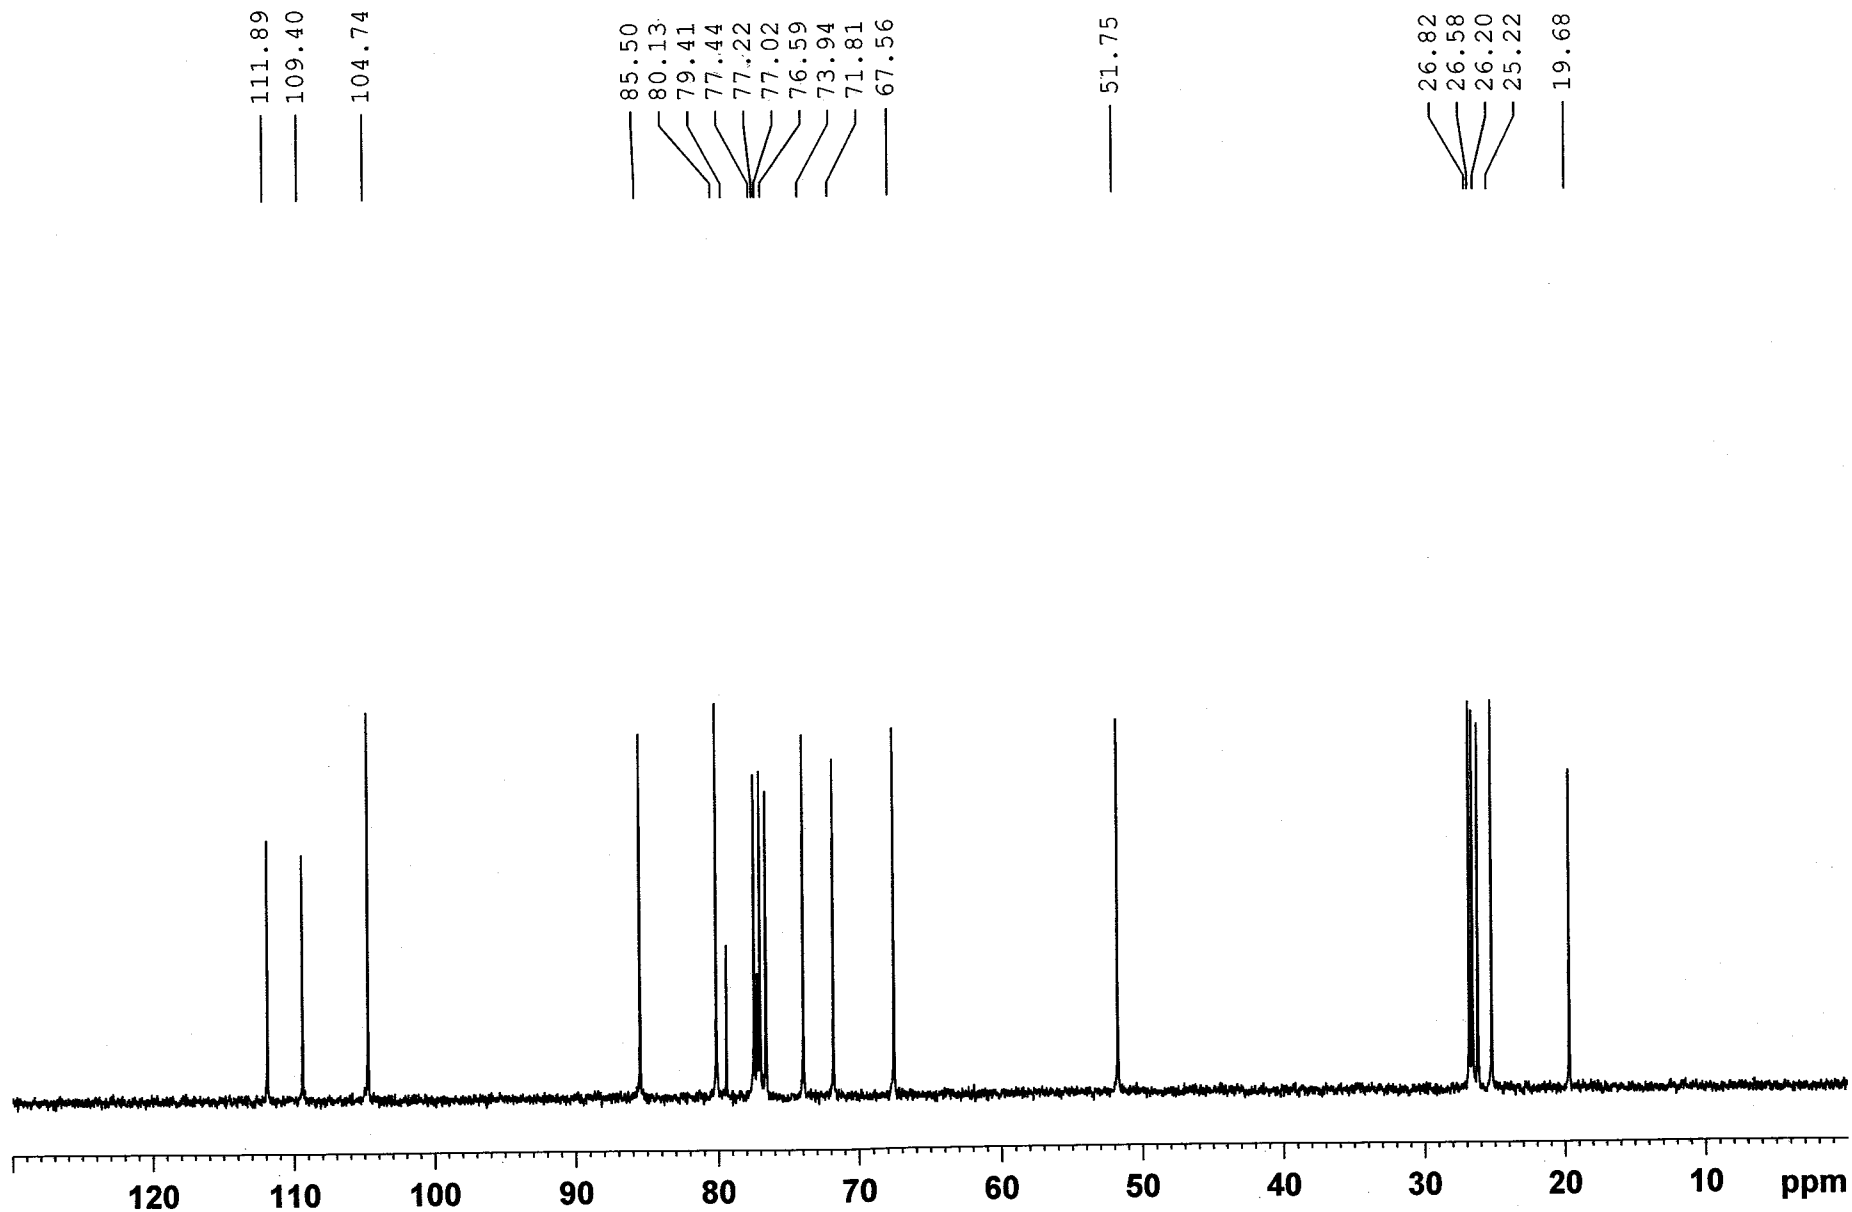

<sup>1</sup>H NMR spectrum (CDCl<sub>3</sub>, 300 MHz) of **13**

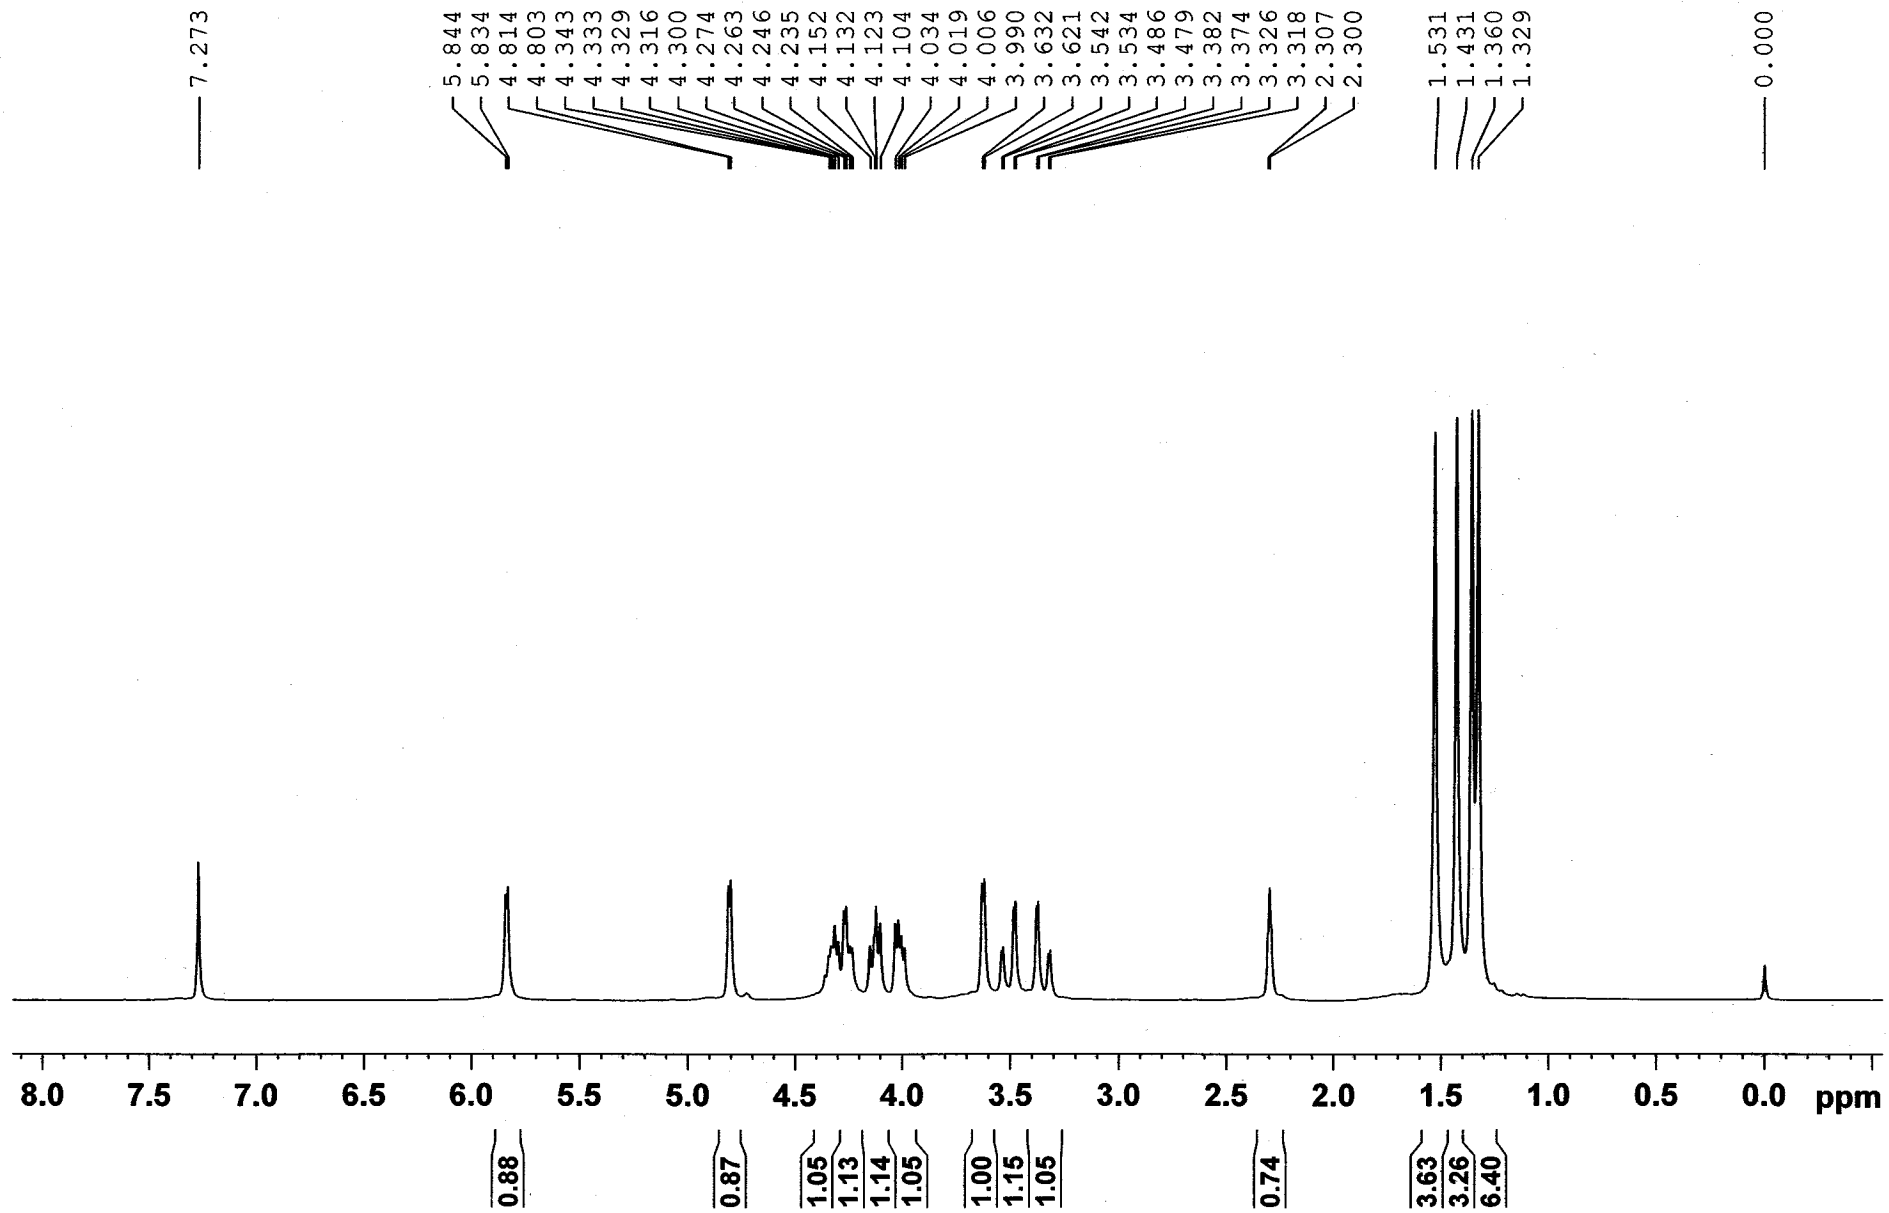

$^{13}\text{C}$  NMR spectrum ( $\text{CDCl}_3$ , 75 MHz) of **14**

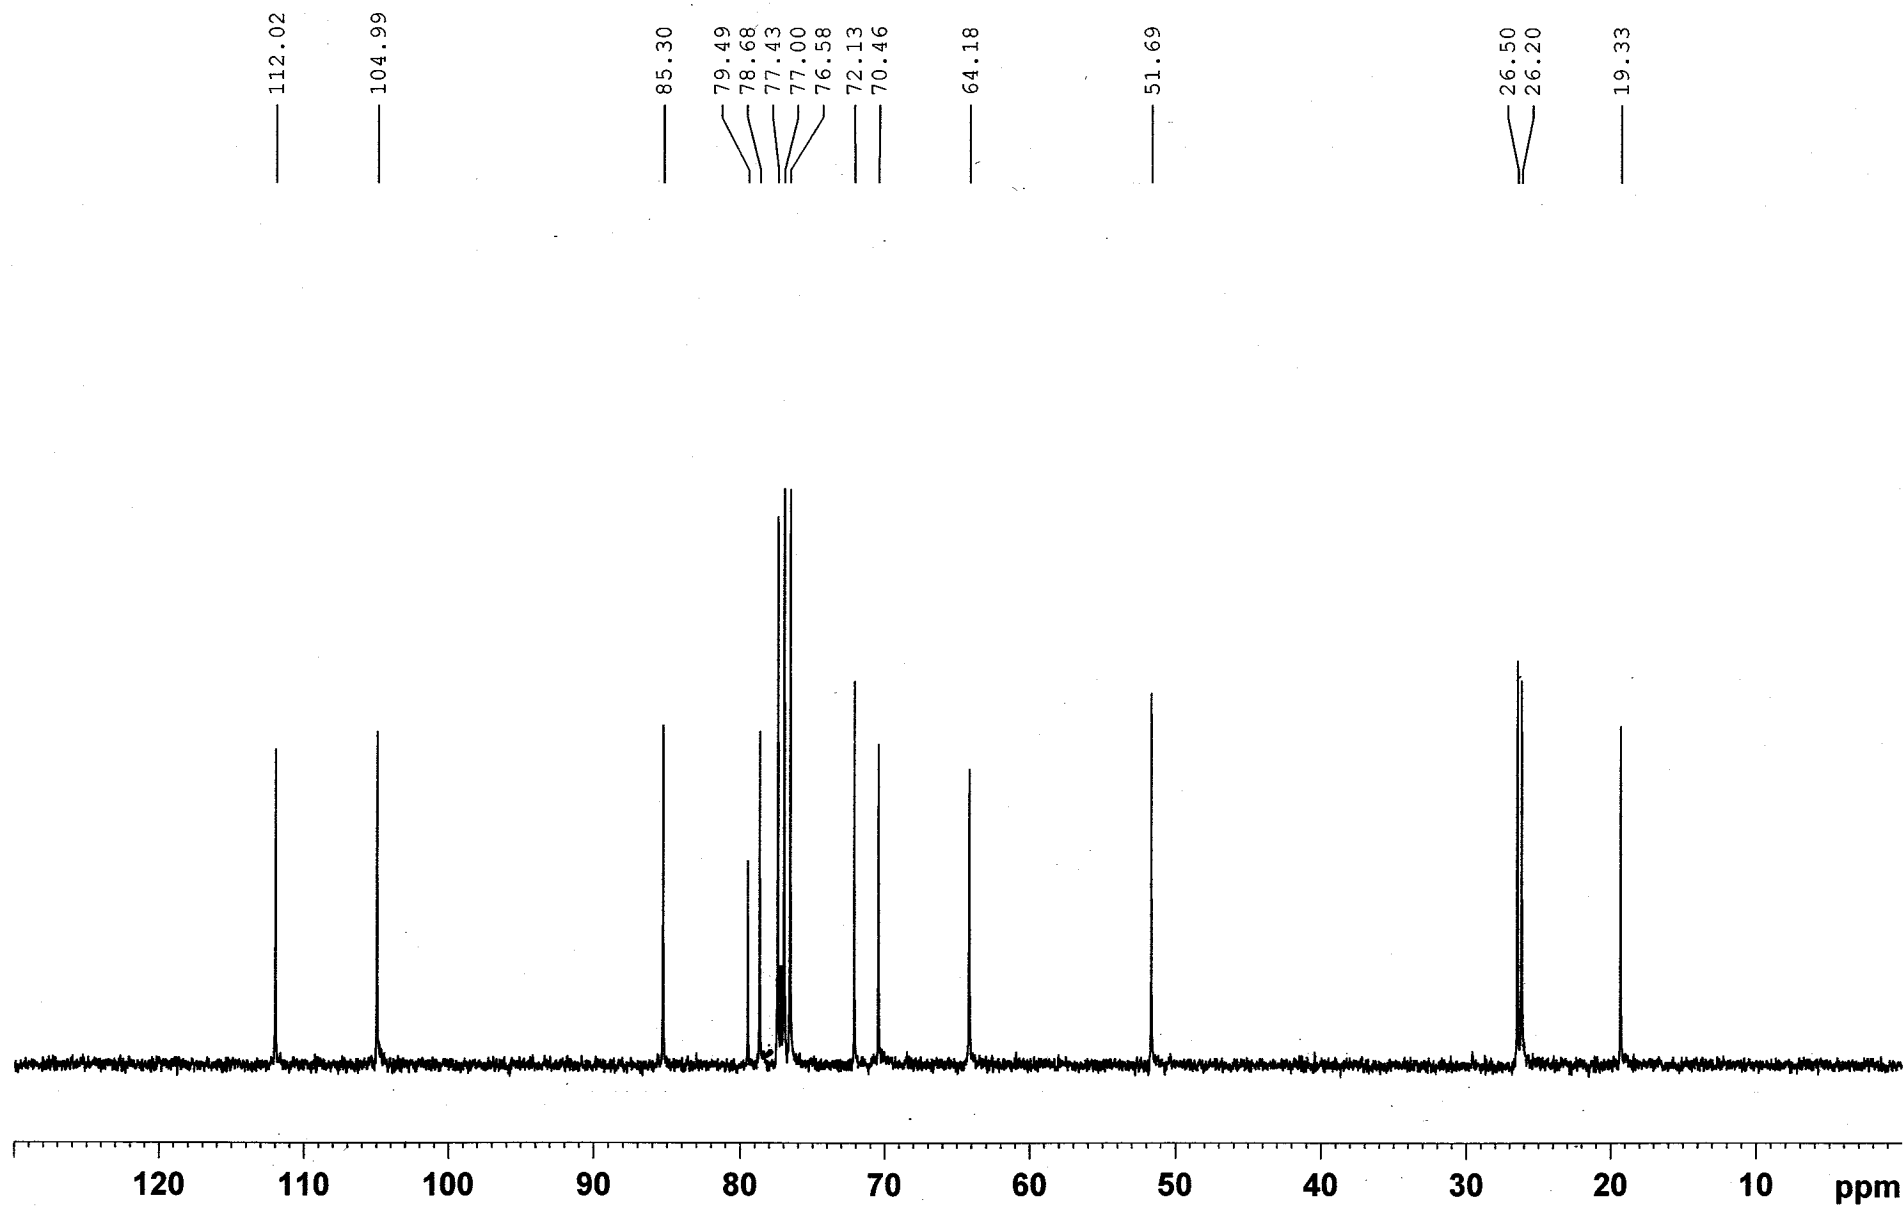

<sup>1</sup>H NMR spectrum (CDCl<sub>3</sub>, 300 MHz) of 14

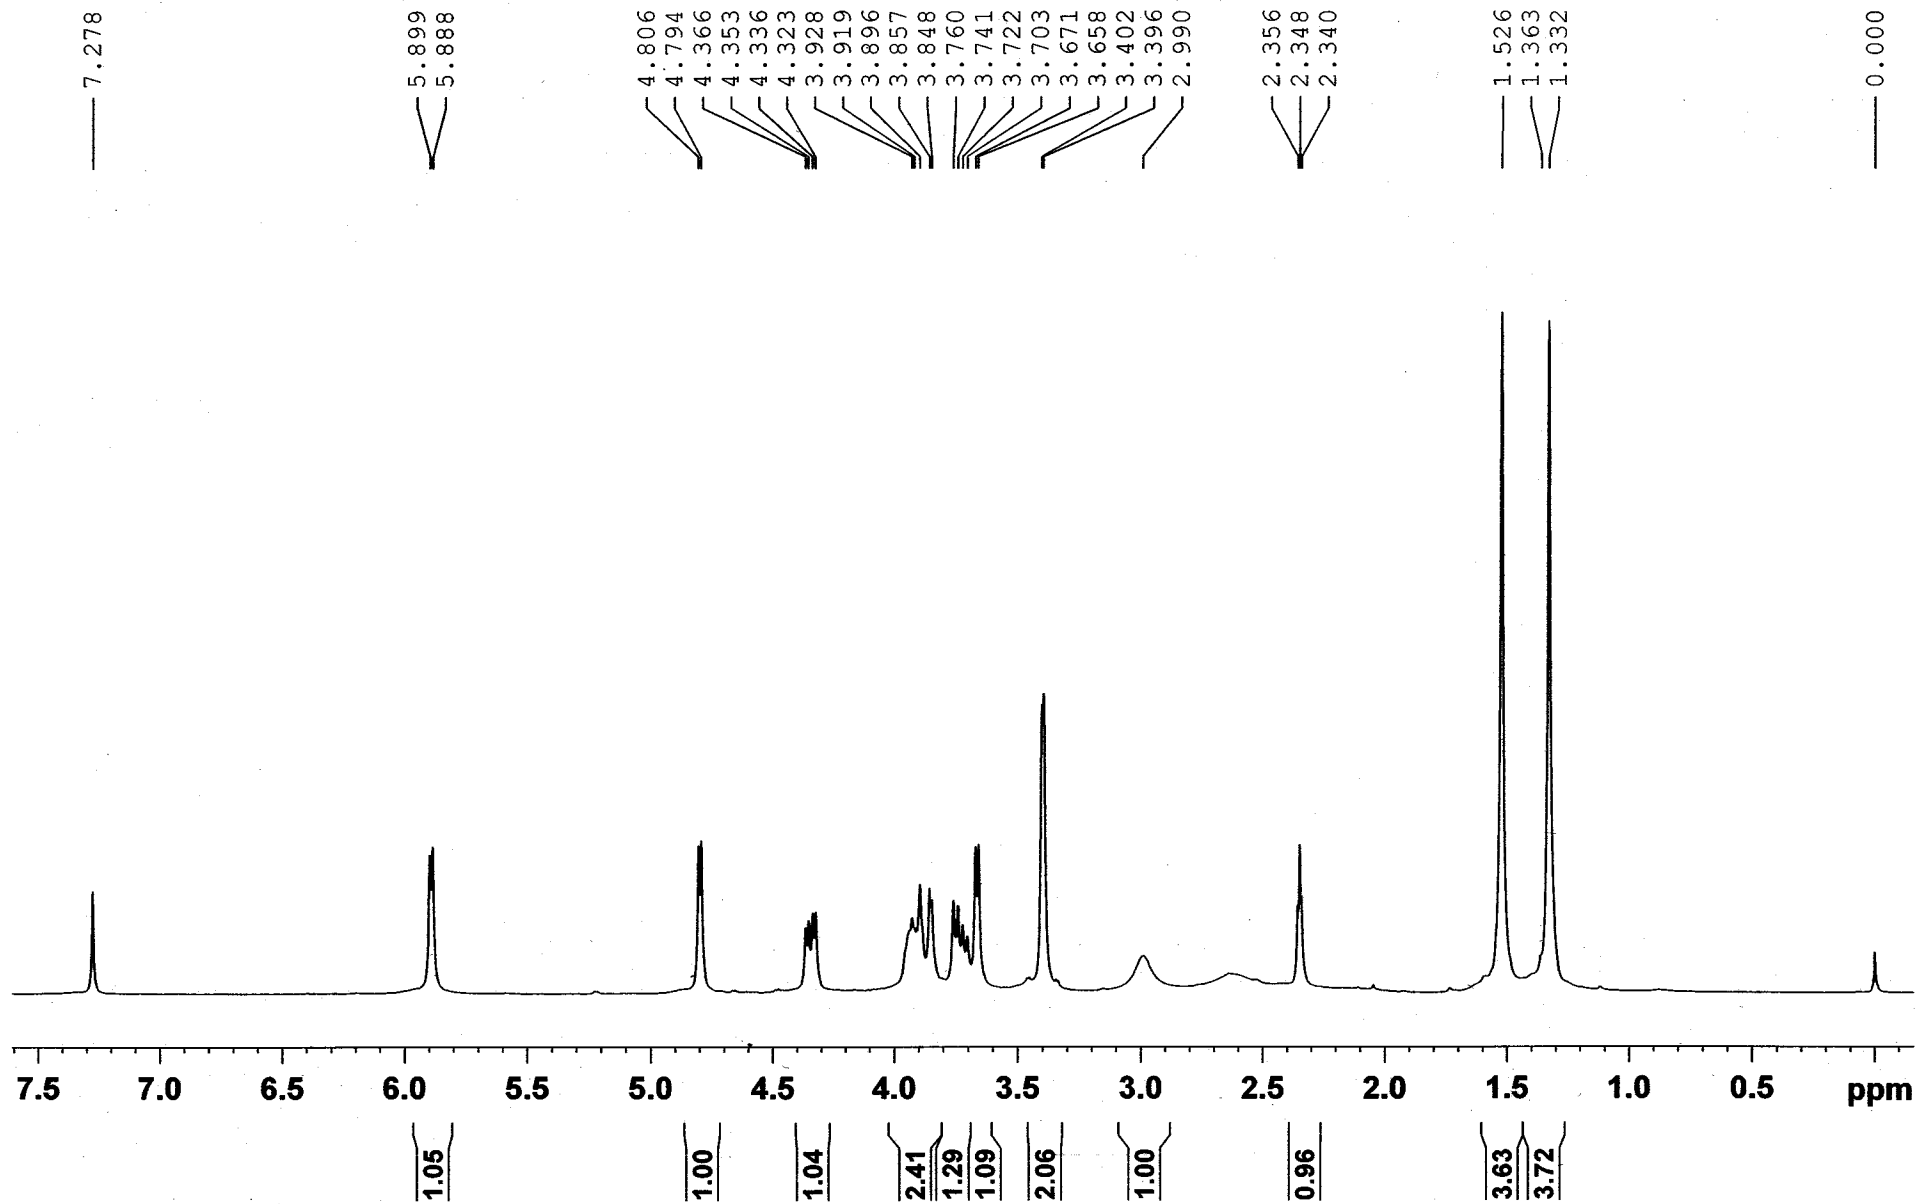

<sup>1</sup>H NMR spectrum (CDCl<sub>3</sub>, 300 MHz) of **15**

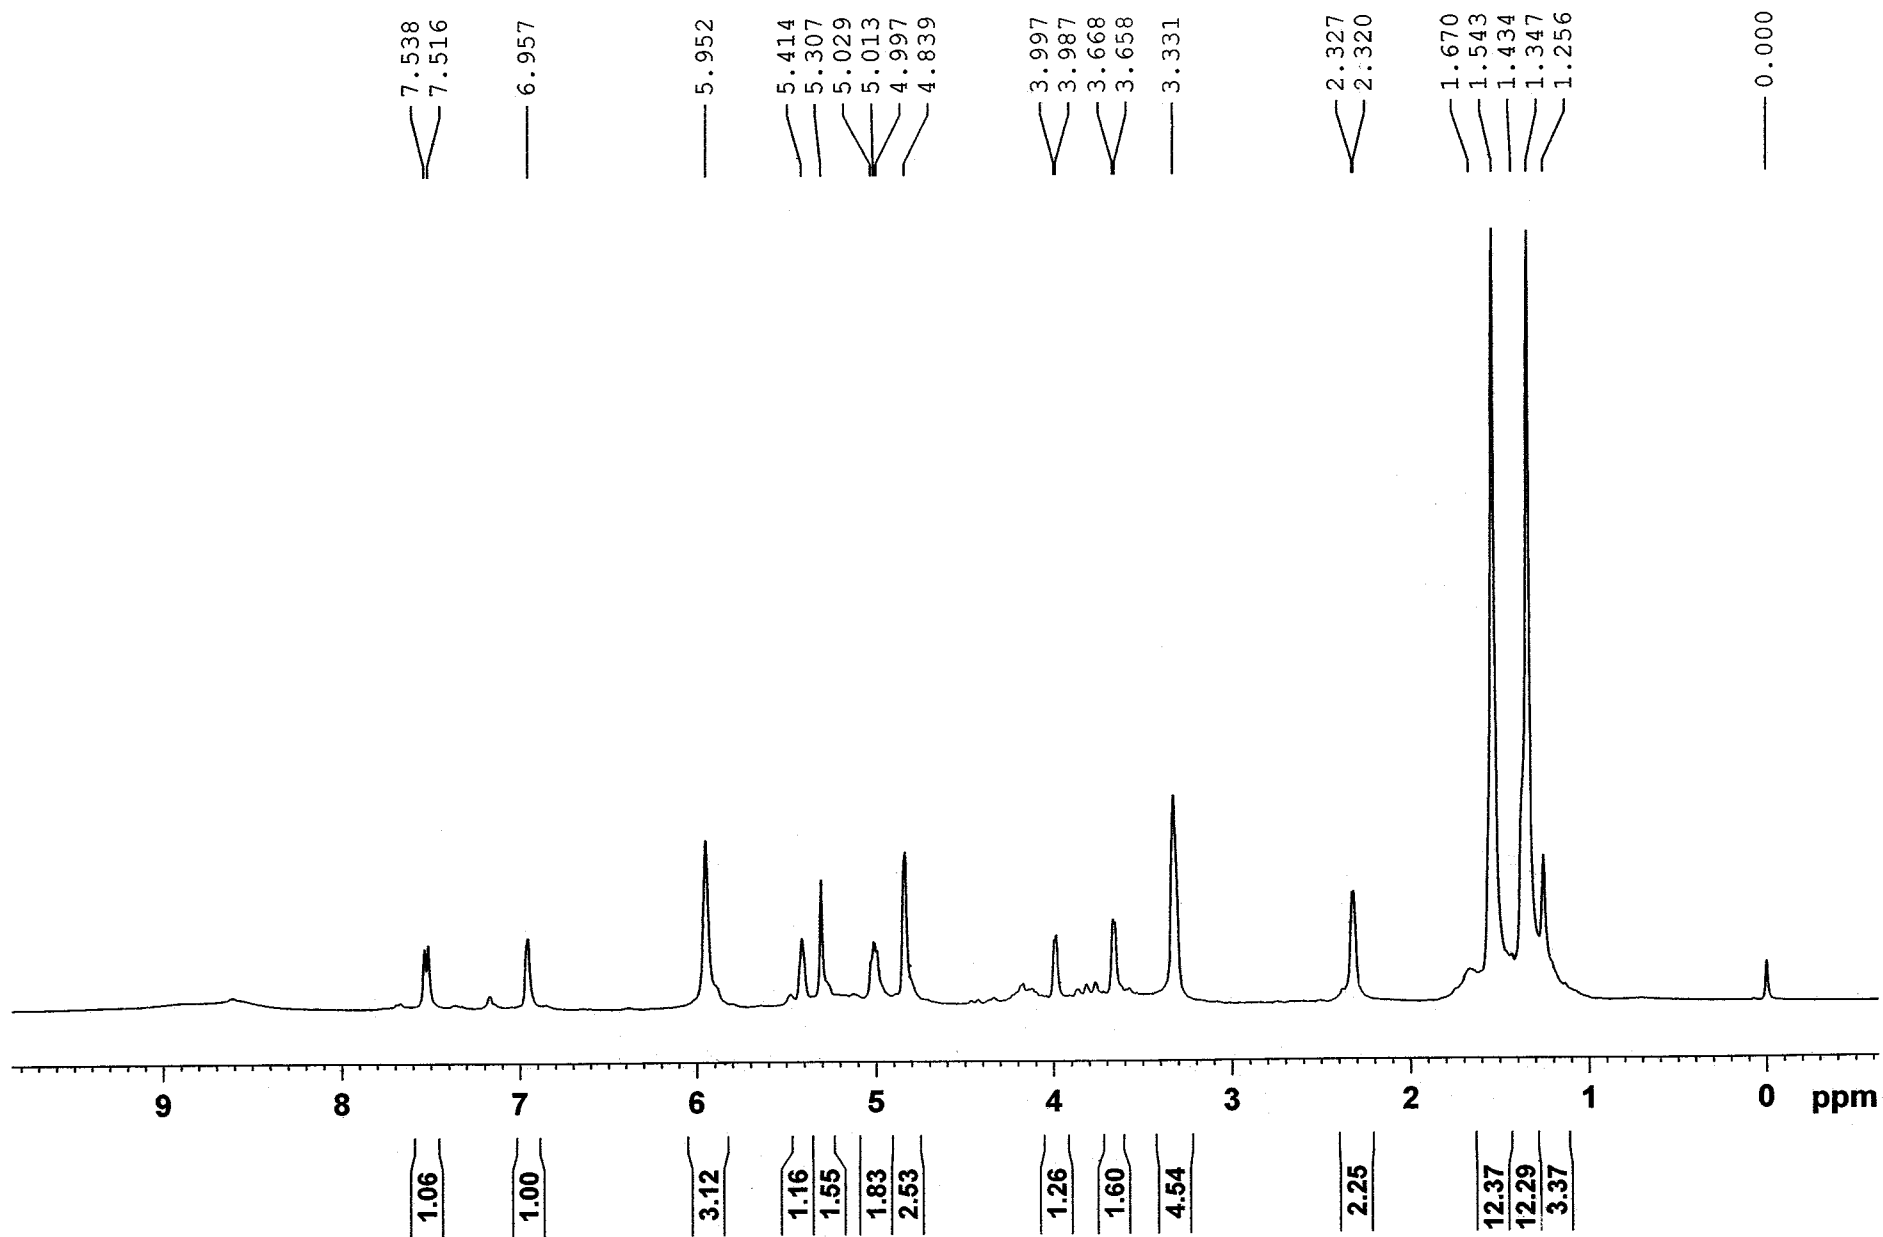

$^{13}\text{C}$  NMR spectrum ( $\text{CDCl}_3$ , 75 MHz) of 17

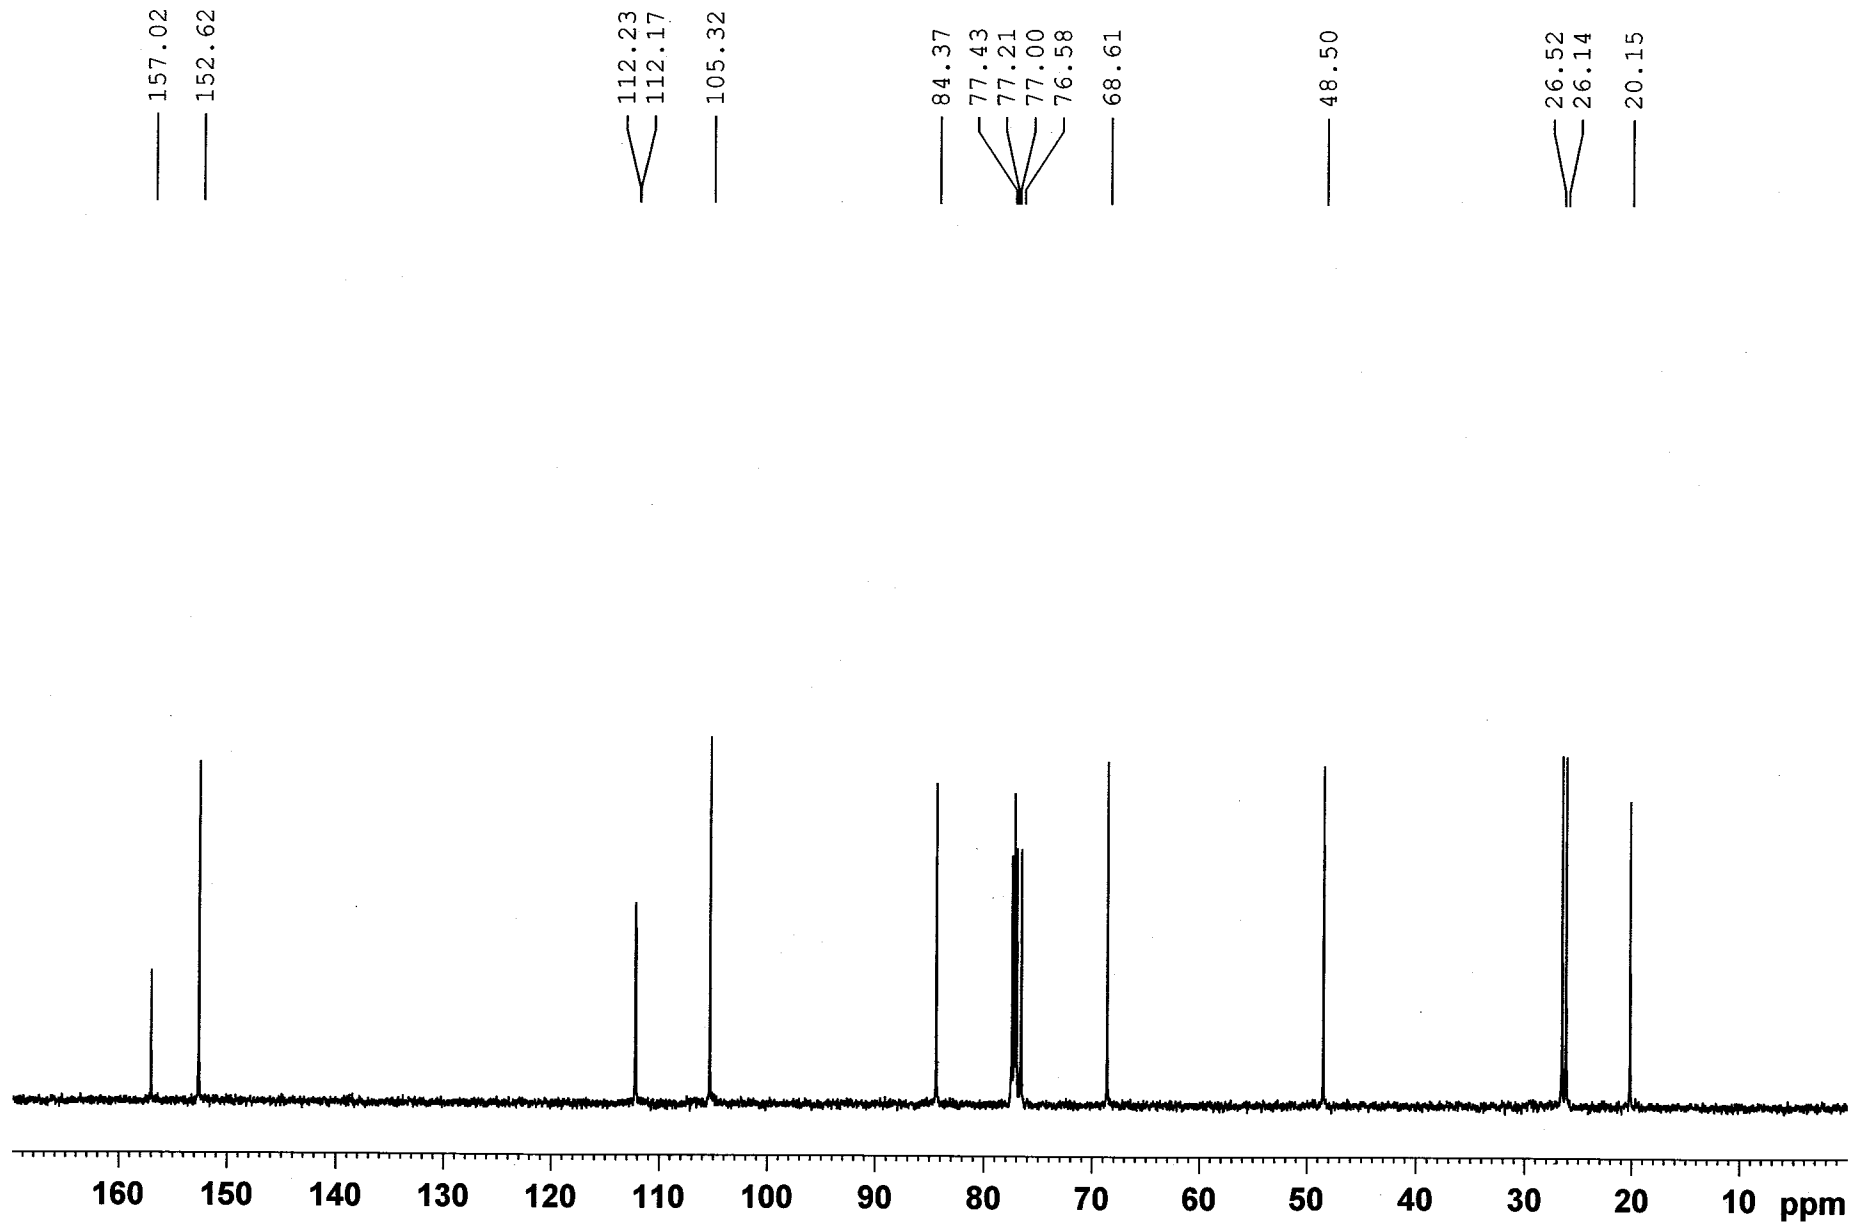



<sup>1</sup>H NMR spectrum (CDCl<sub>3</sub>, 300 MHz) of 17

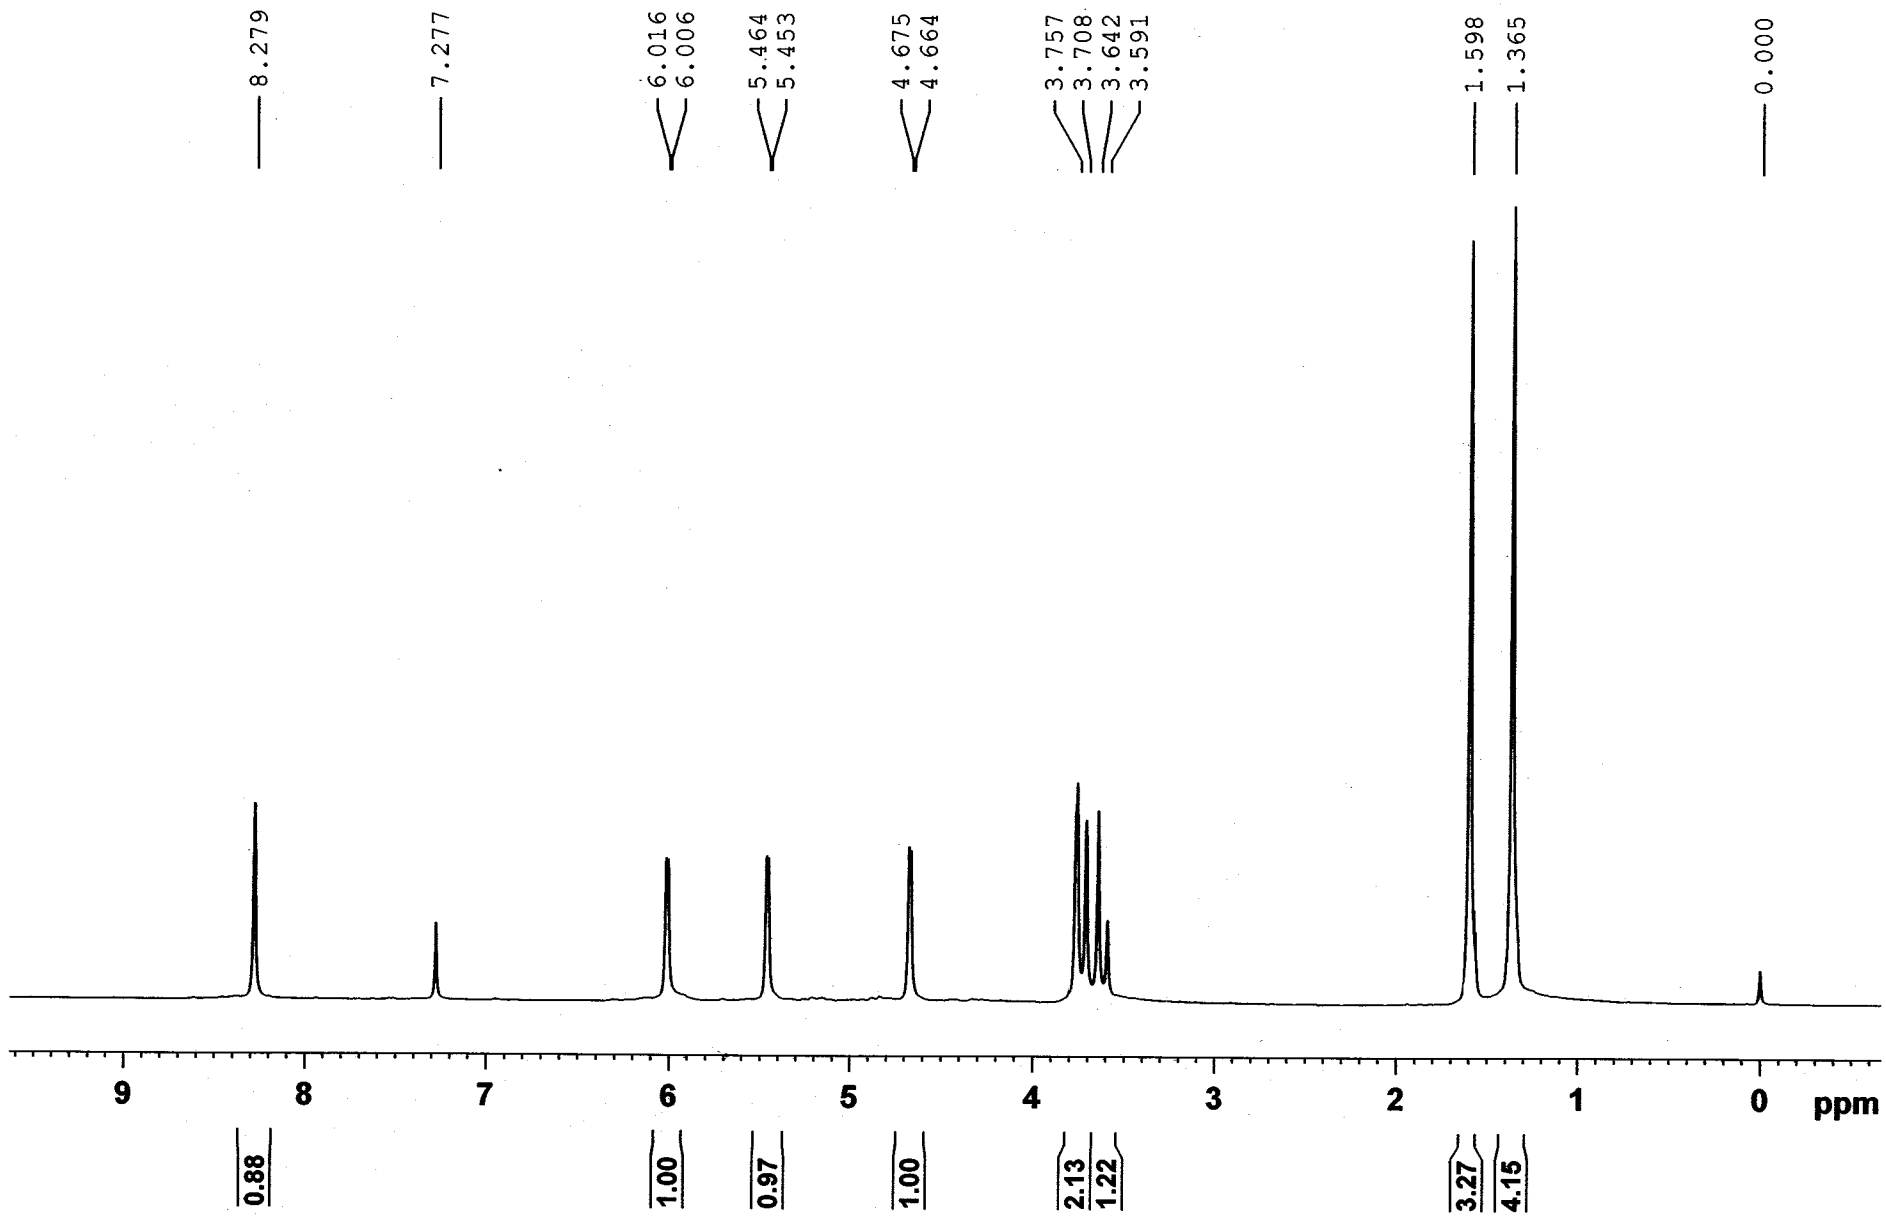

$^{13}\text{C}$  NMR spectrum ( $\text{CDCl}_3$ , 75 MHz) of **19**

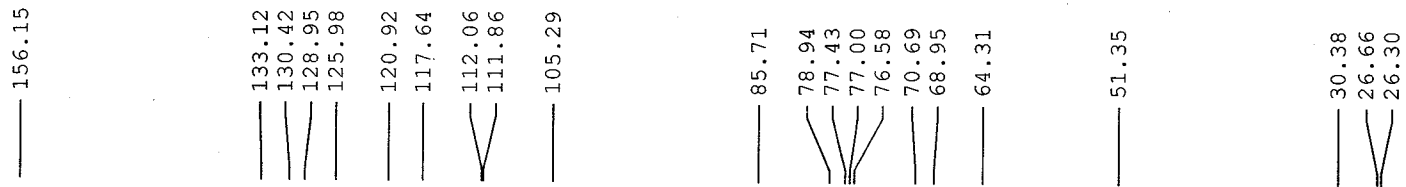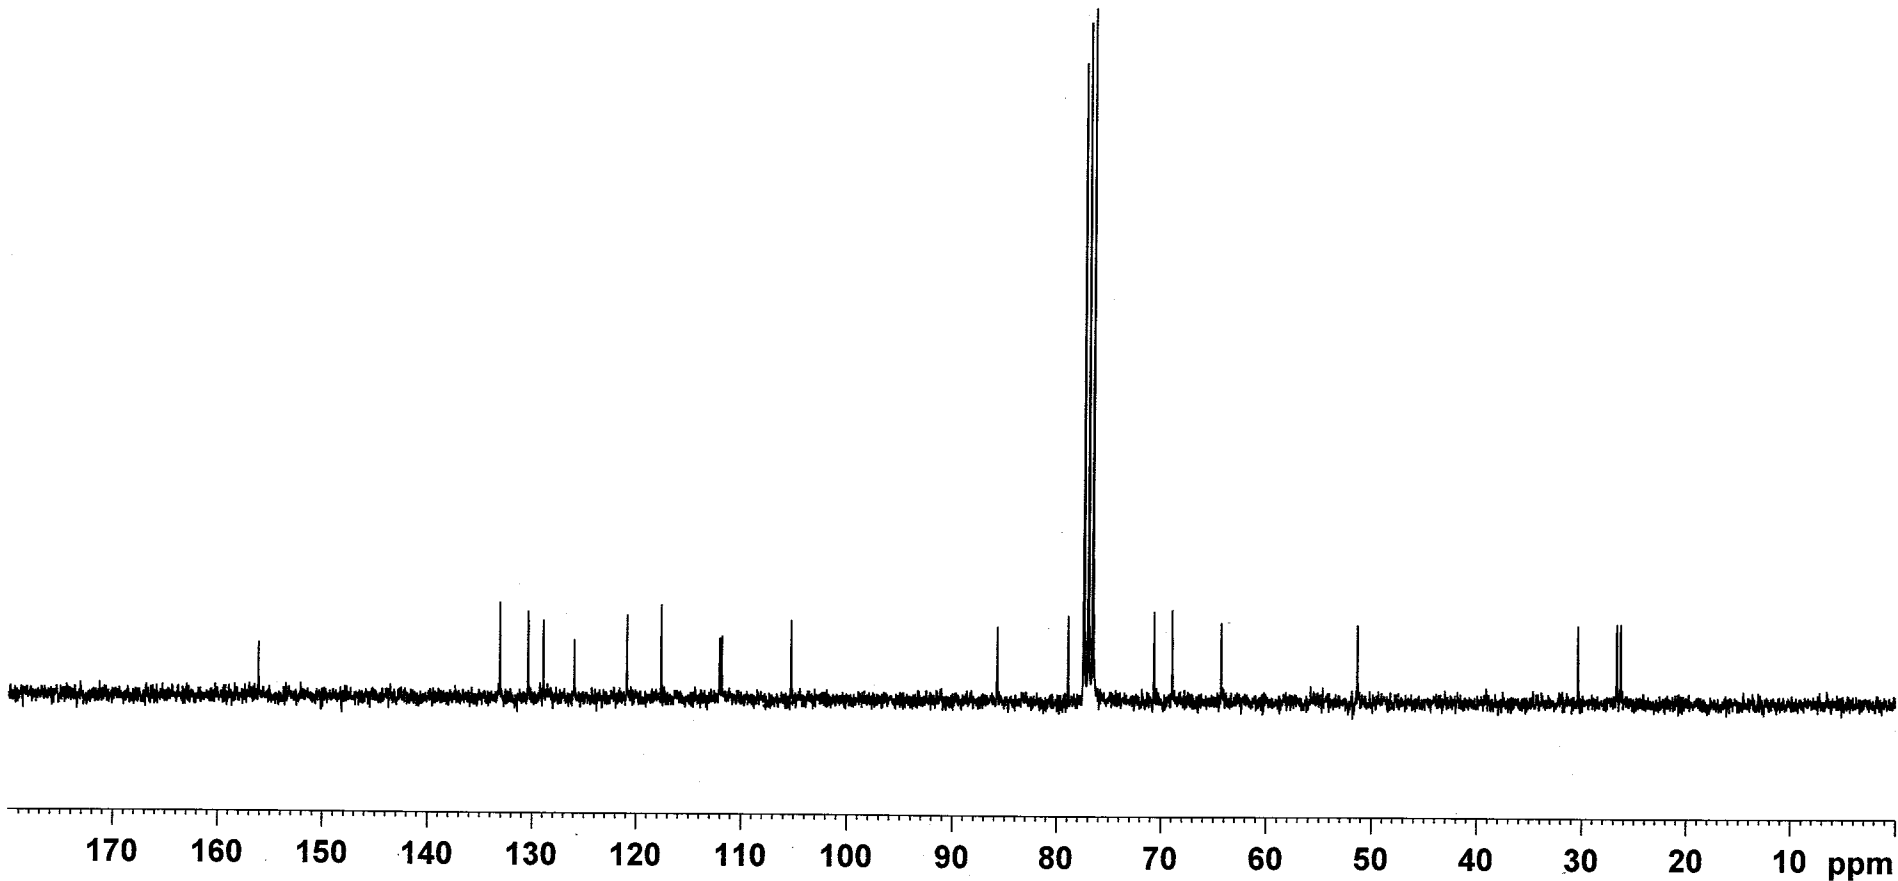

<sup>1</sup>H NMR spectrum (CDCl<sub>3</sub>, 600 MHz) of **19**

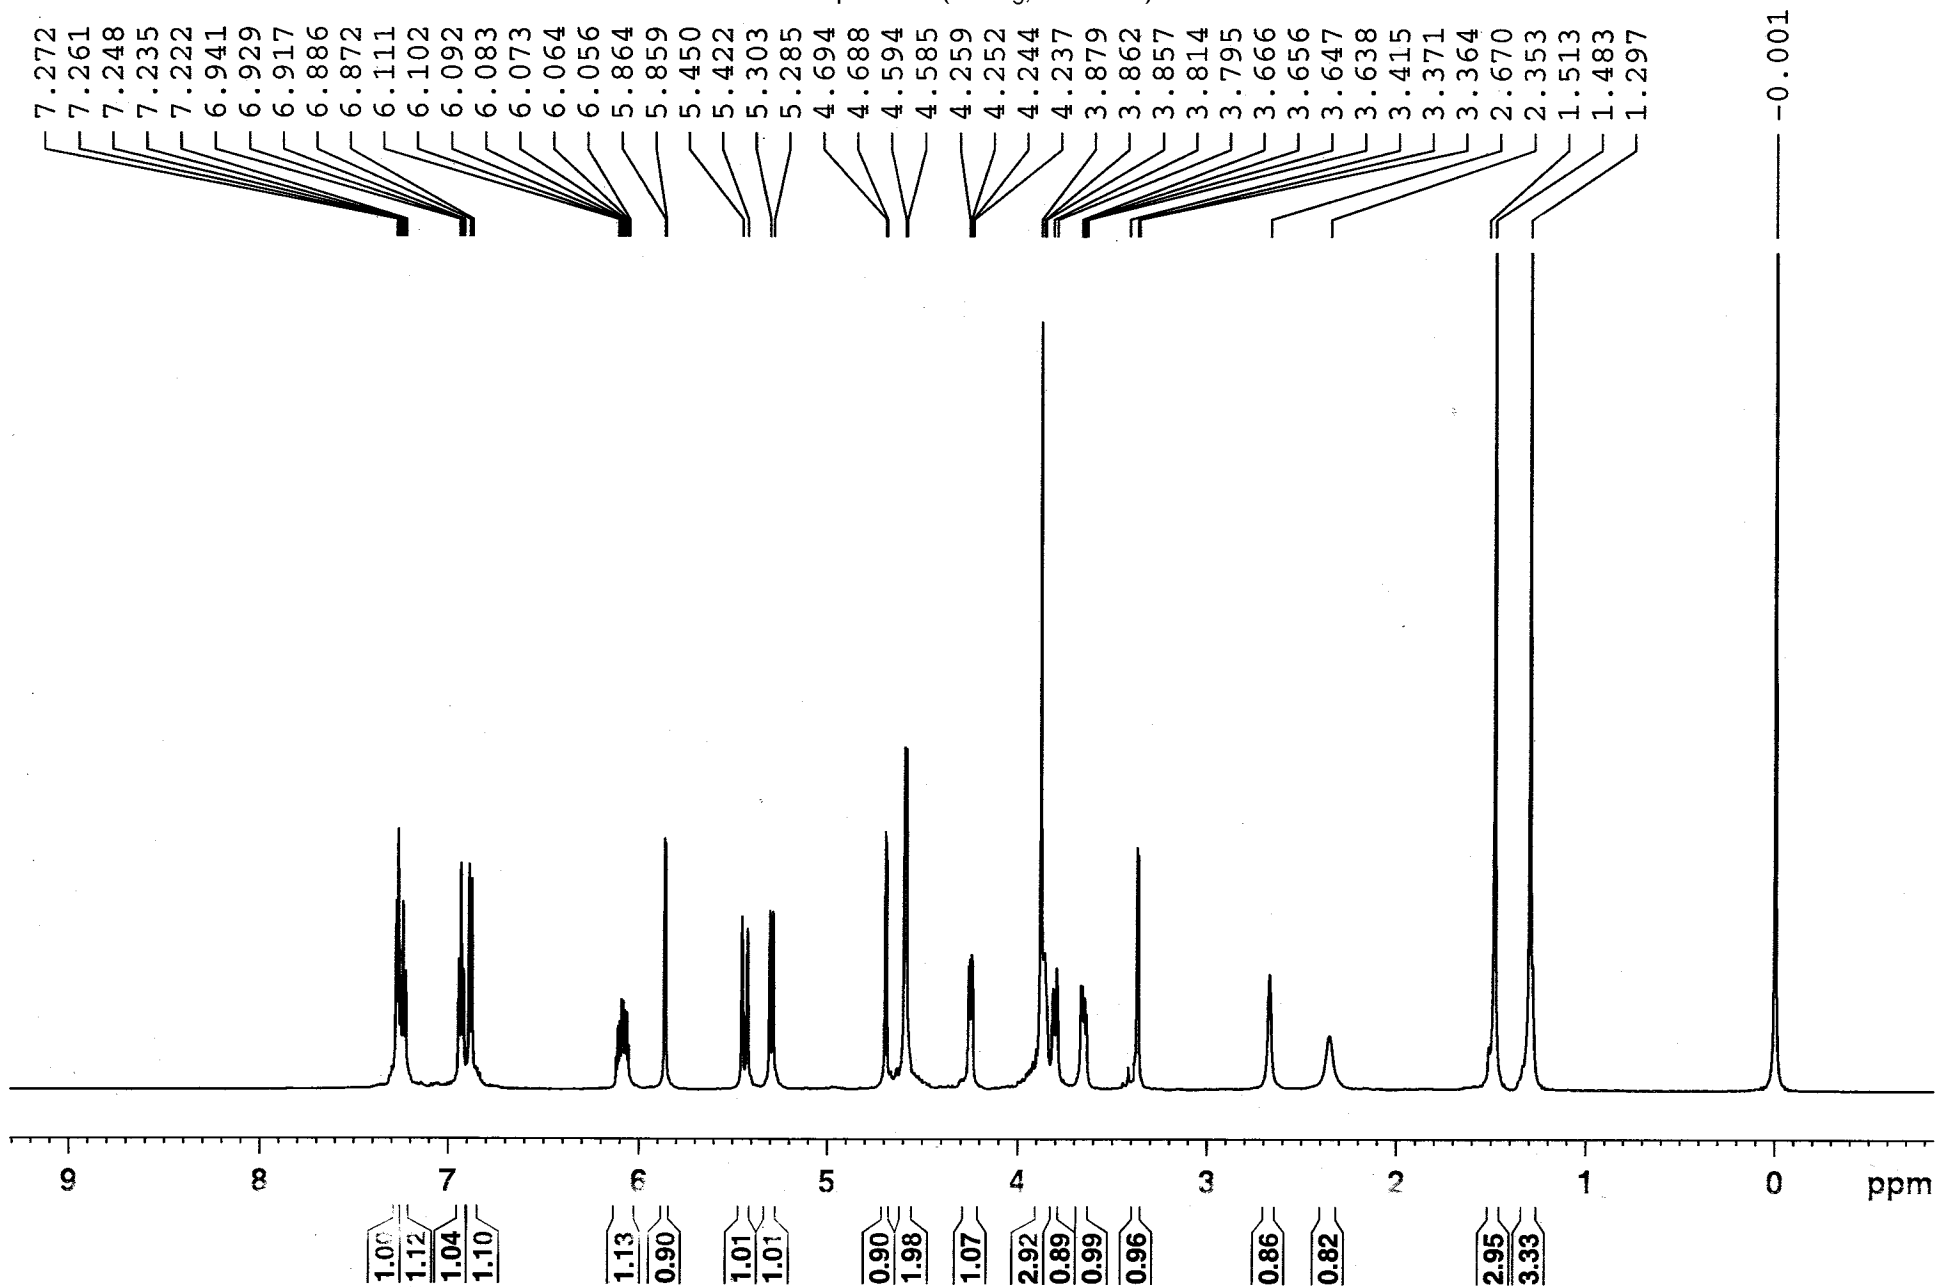

<sup>13</sup>C NMR spectrum (CDCl<sub>3</sub>, 75 MHz) of 21

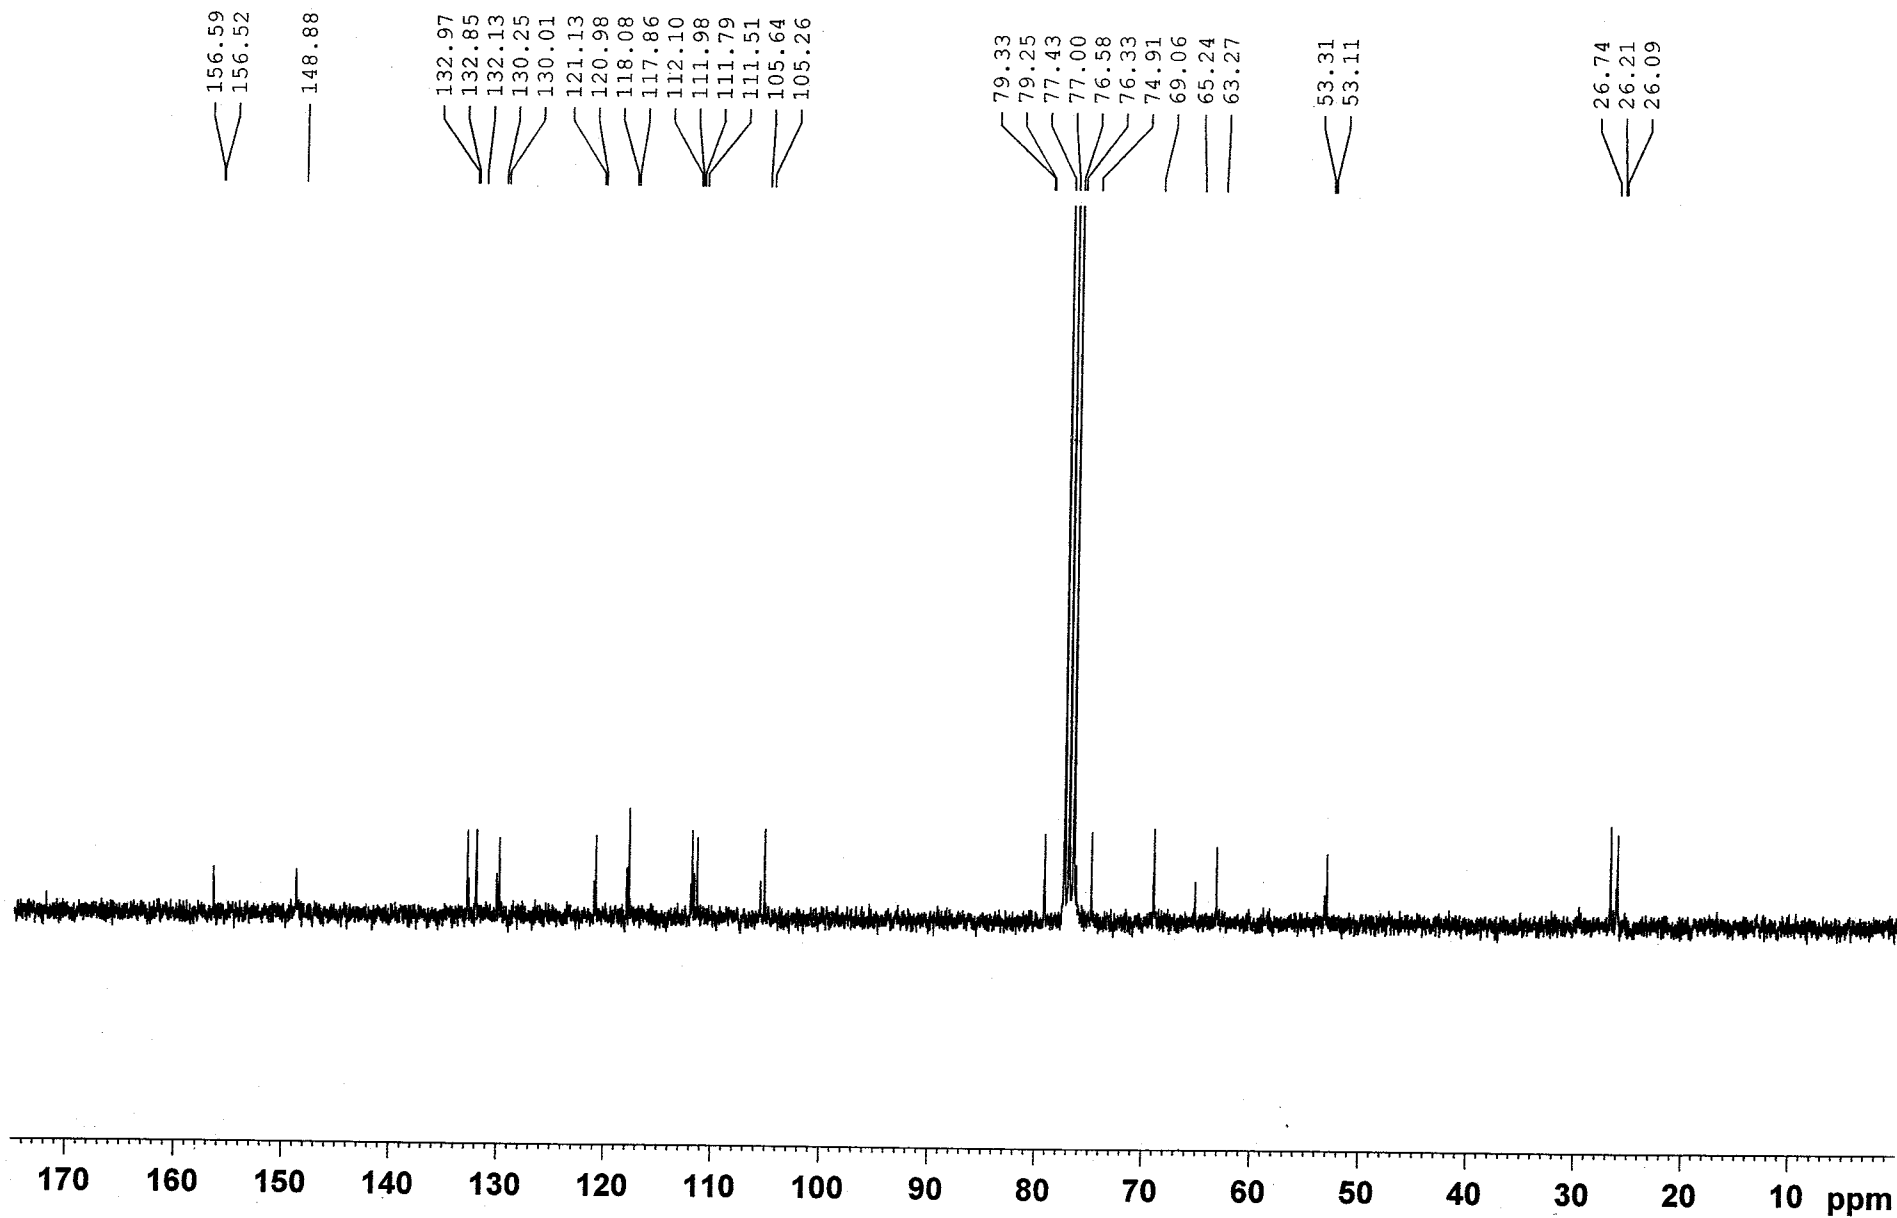

<sup>1</sup>H NMR spectrum (CDCl<sub>3</sub>, 300 MHz) of **21**

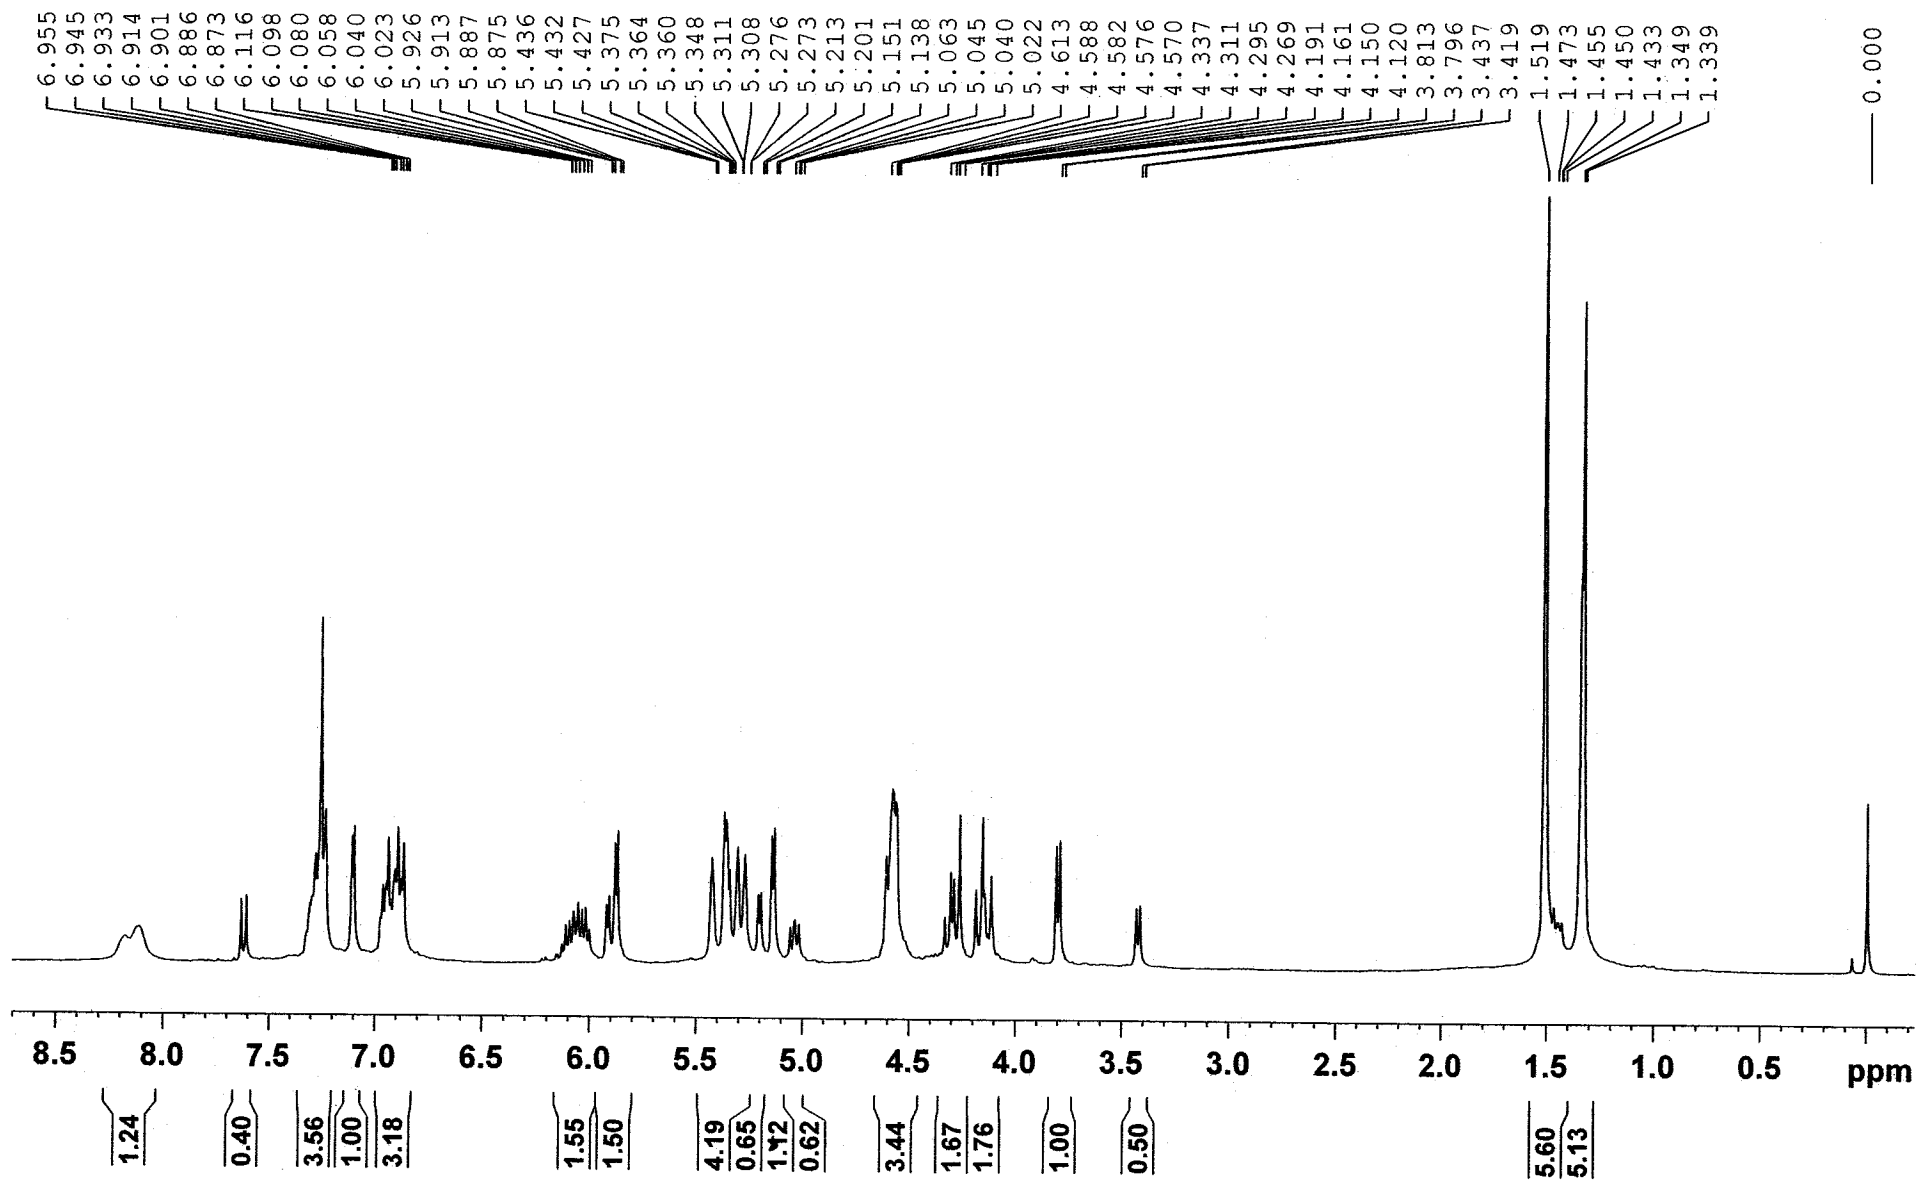

$^{13}\text{C}$  NMR spectrum ( $\text{CDCl}_3$ , 150 MHz) of **23**

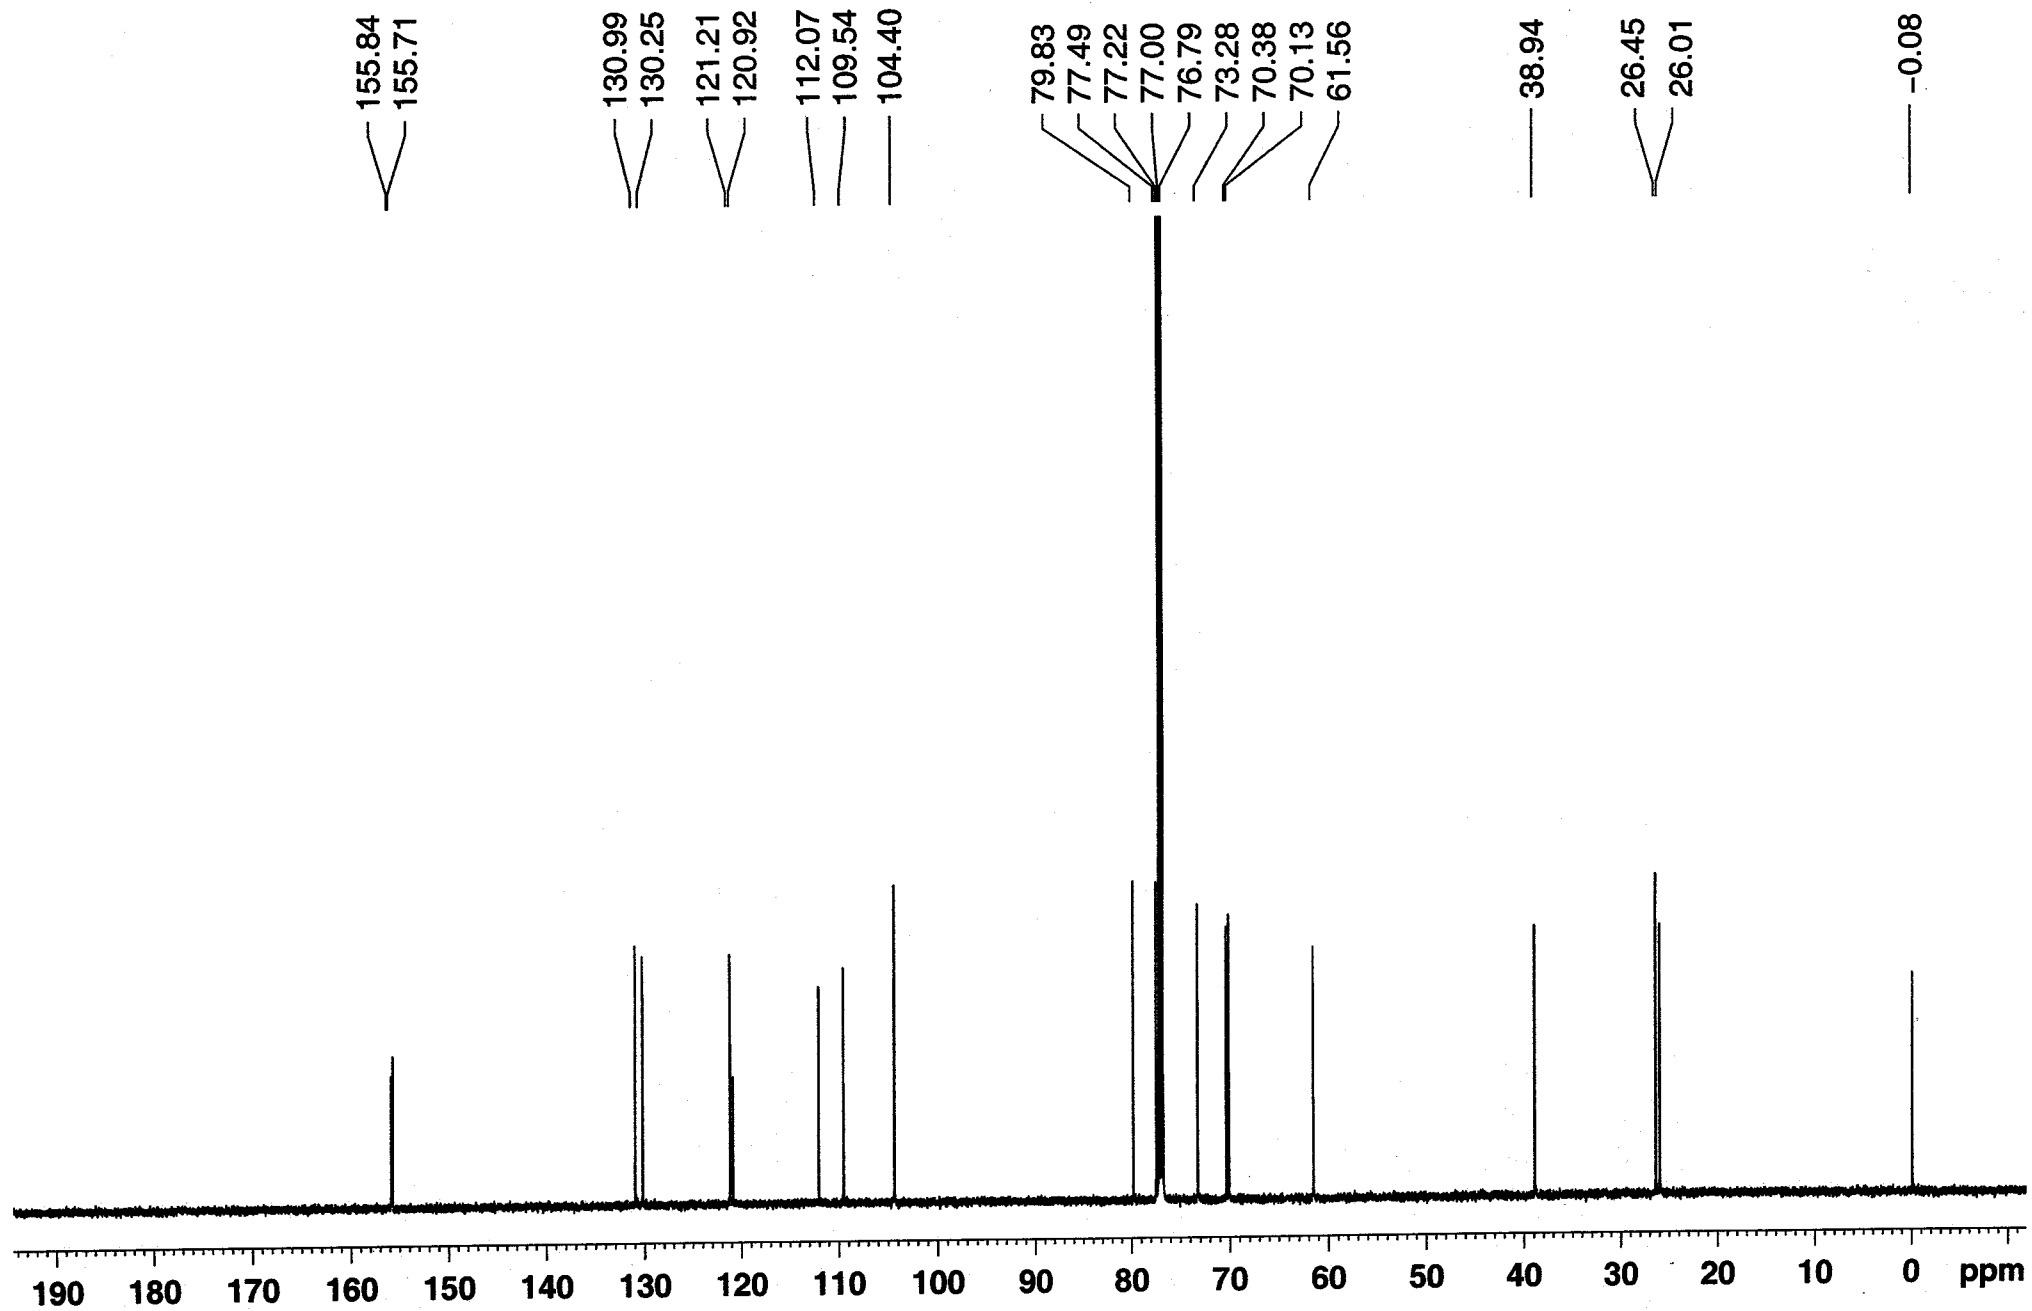

$^1\text{H}$  NMR spectrum ( $\text{CDCl}_3$ , 600 MHz) of **23**

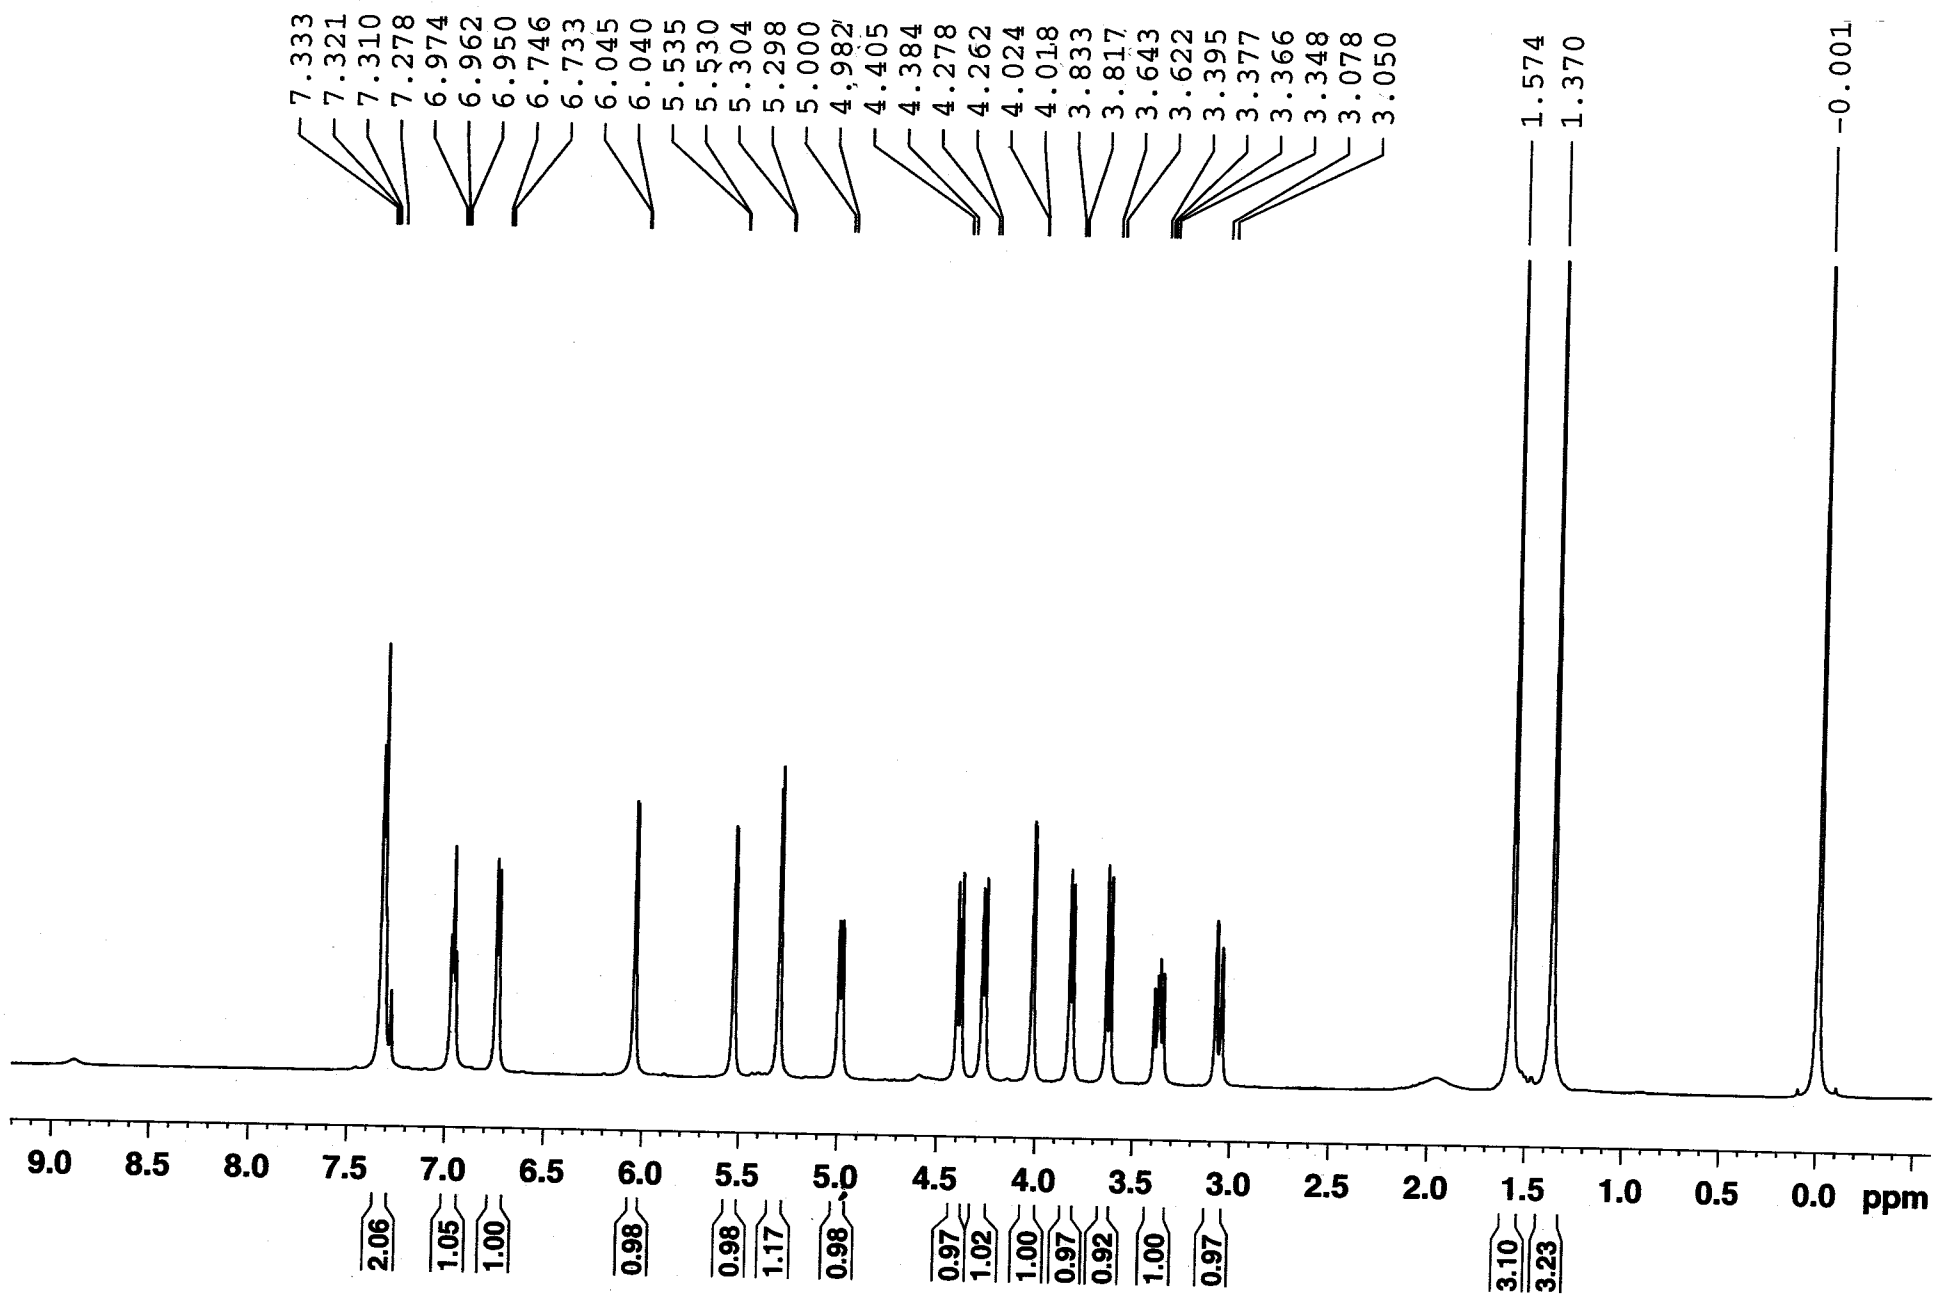

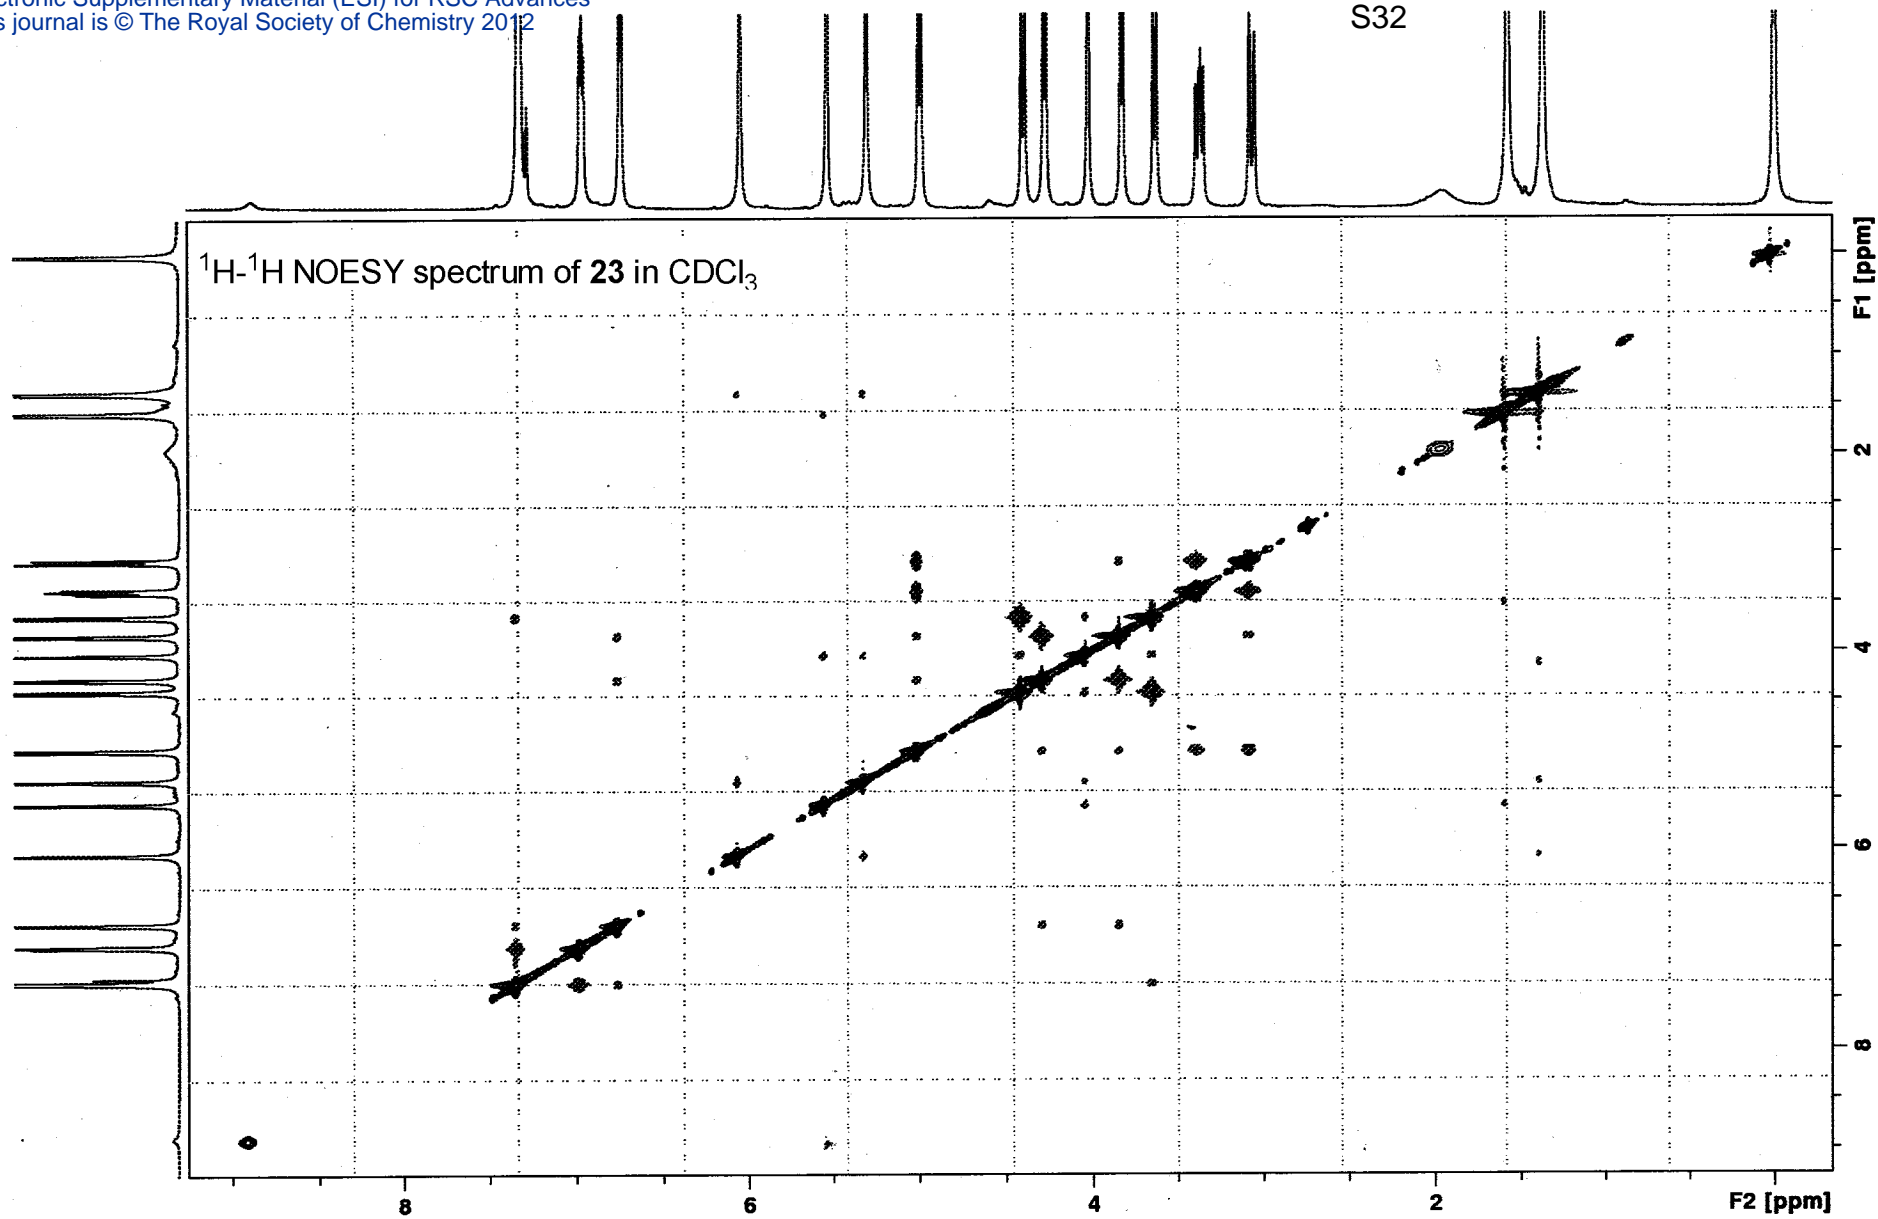



$^1\text{H}$ - $^1\text{H}$  NOESY expanded spectrum of **23** in  $\text{CDCl}_3$

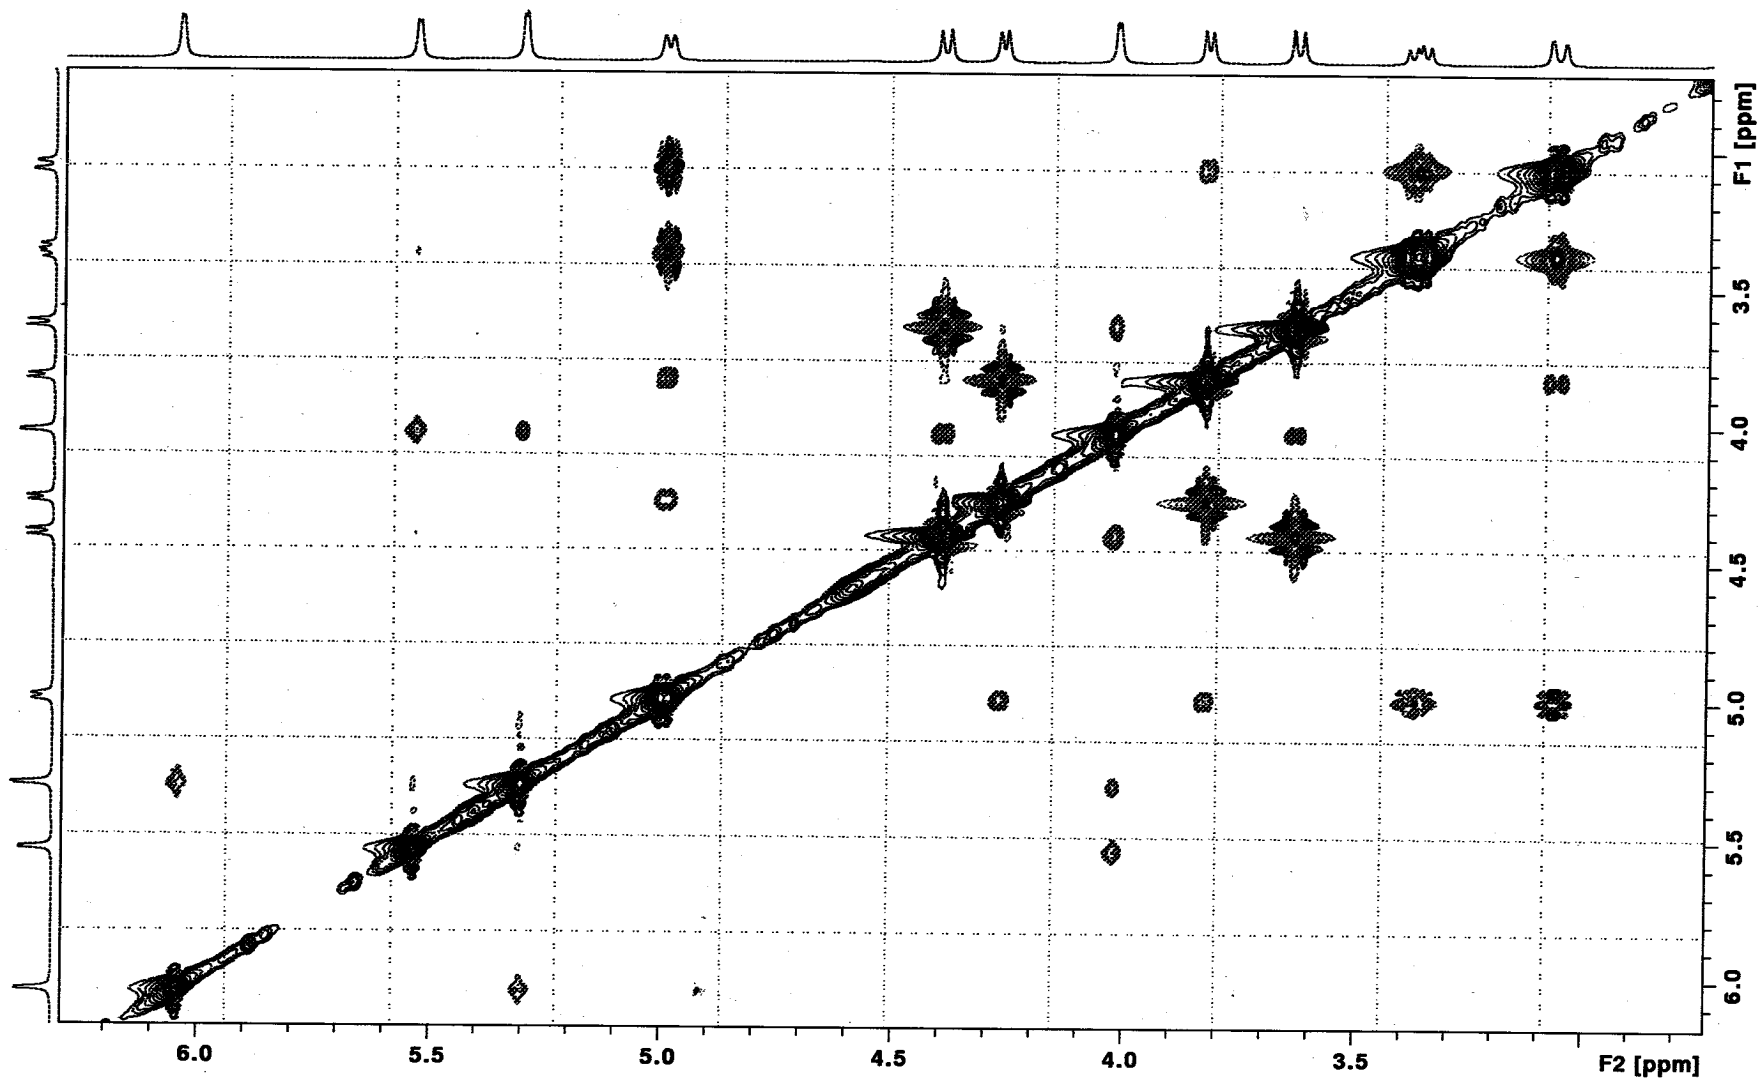

<sup>13</sup>C NMR of spectrum (CDCl<sub>3</sub>, 150 MHz) of 25

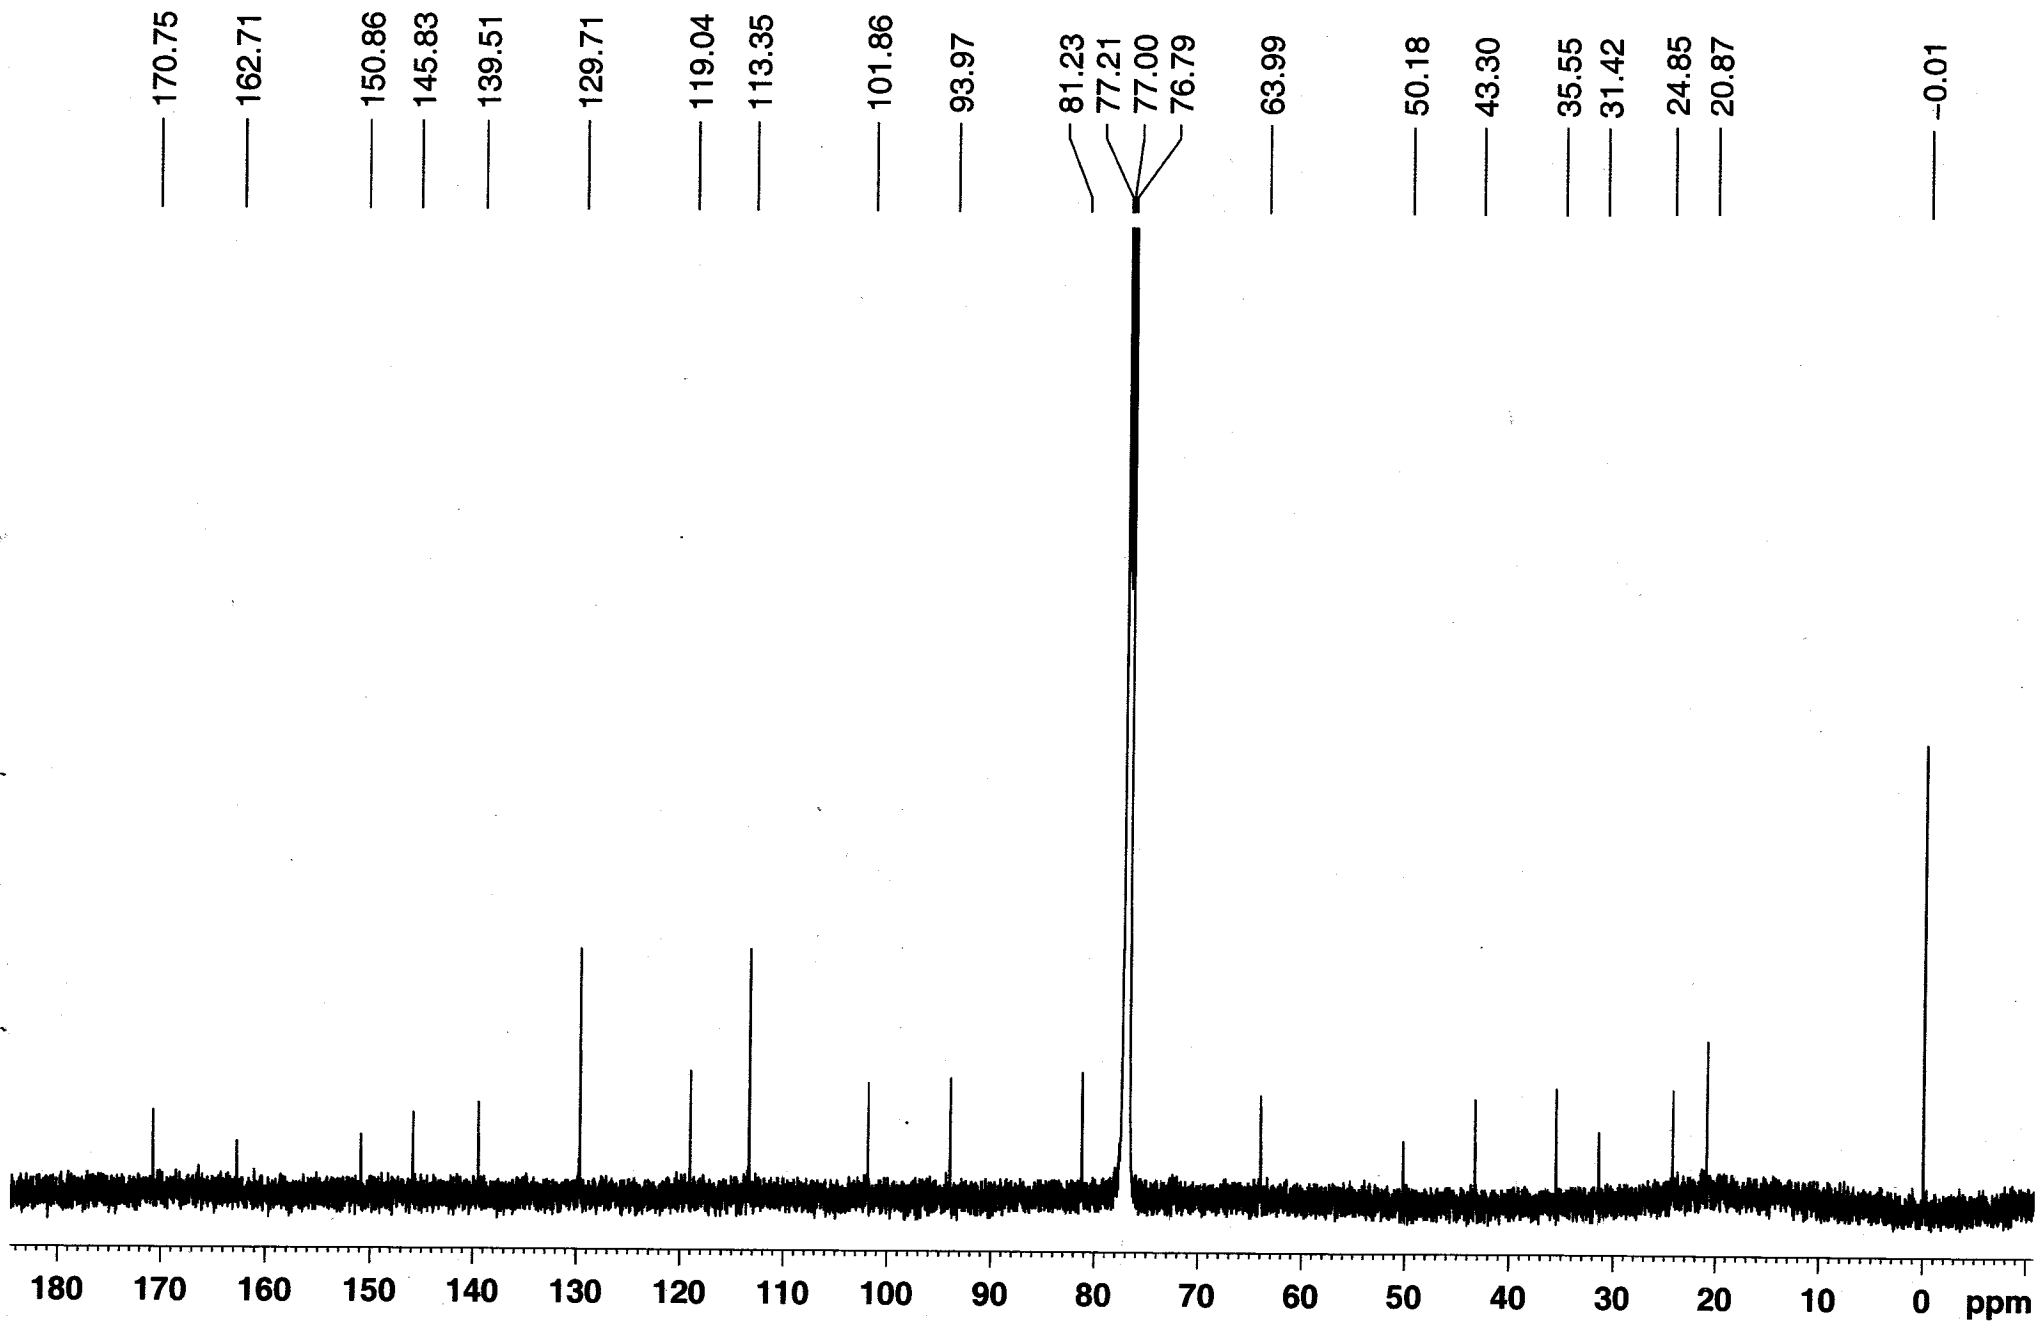

<sup>1</sup>H NMR spectrum (CDCl<sub>3</sub>, 600 MHz) of **25**

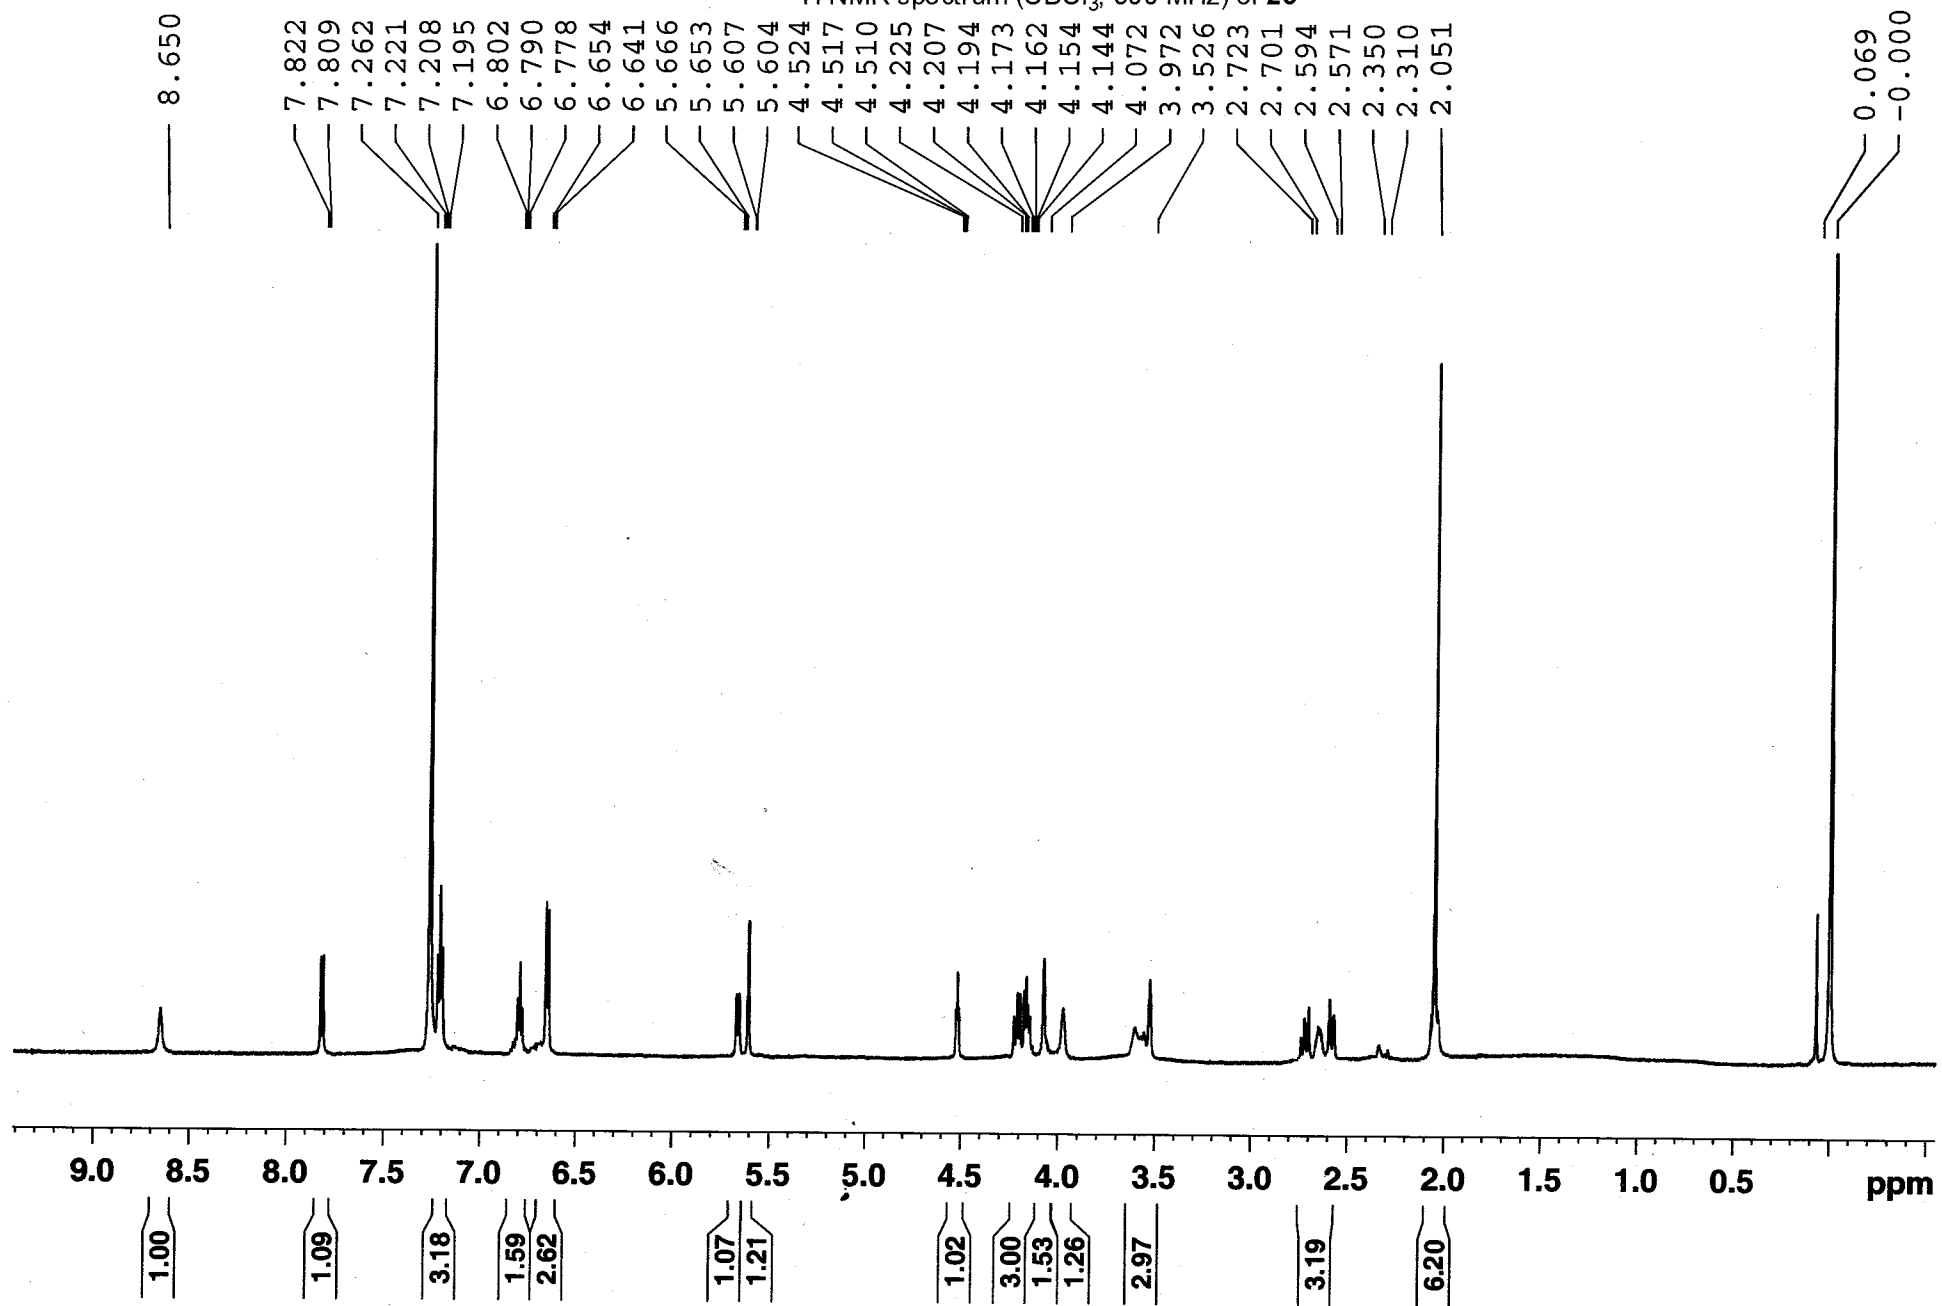

$^{13}\text{C}$  NMR spectrum ( $\text{CDCl}_3$ , 75 MHz) of **27**

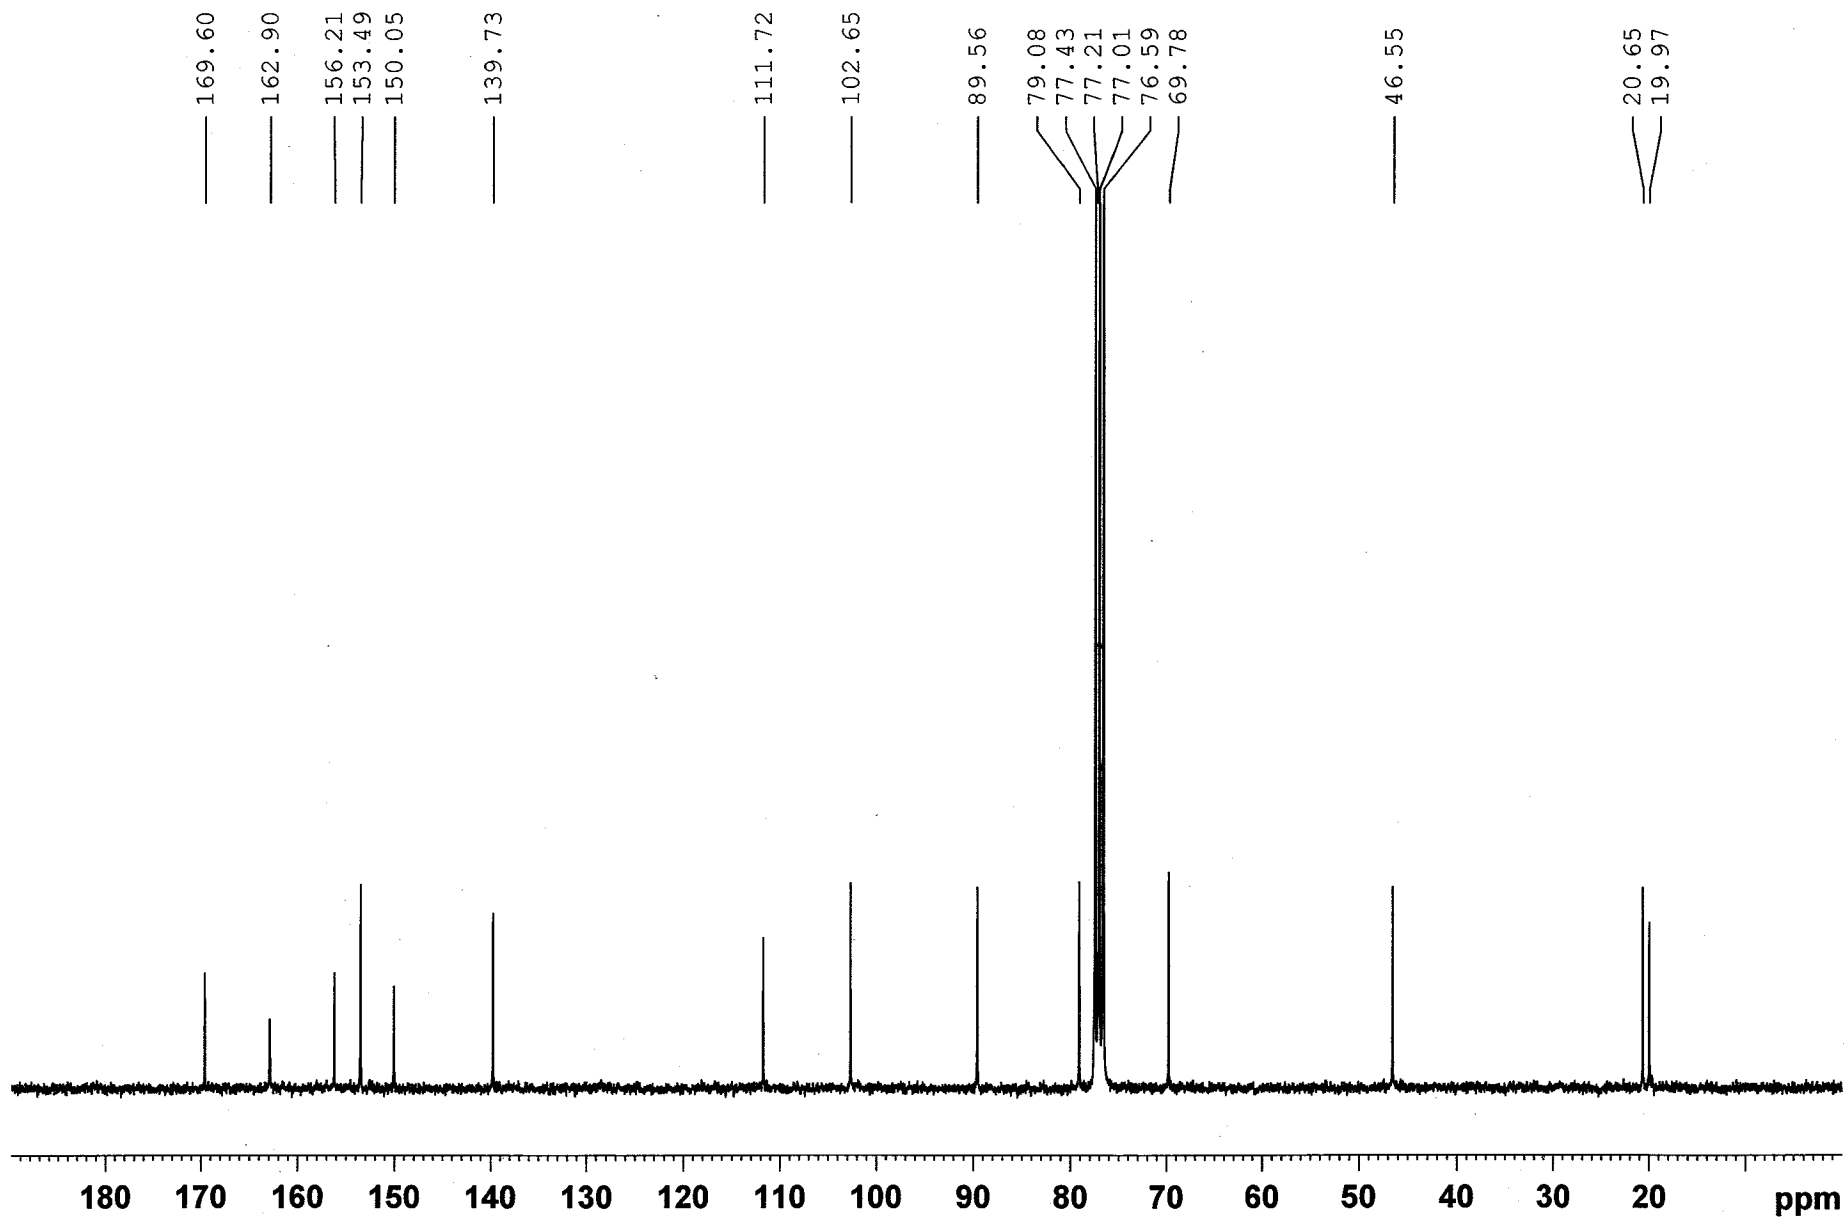

$^1\text{H}$  NMR spectrum ( $\text{CDCl}_3$ , 300 MHz) of **27**

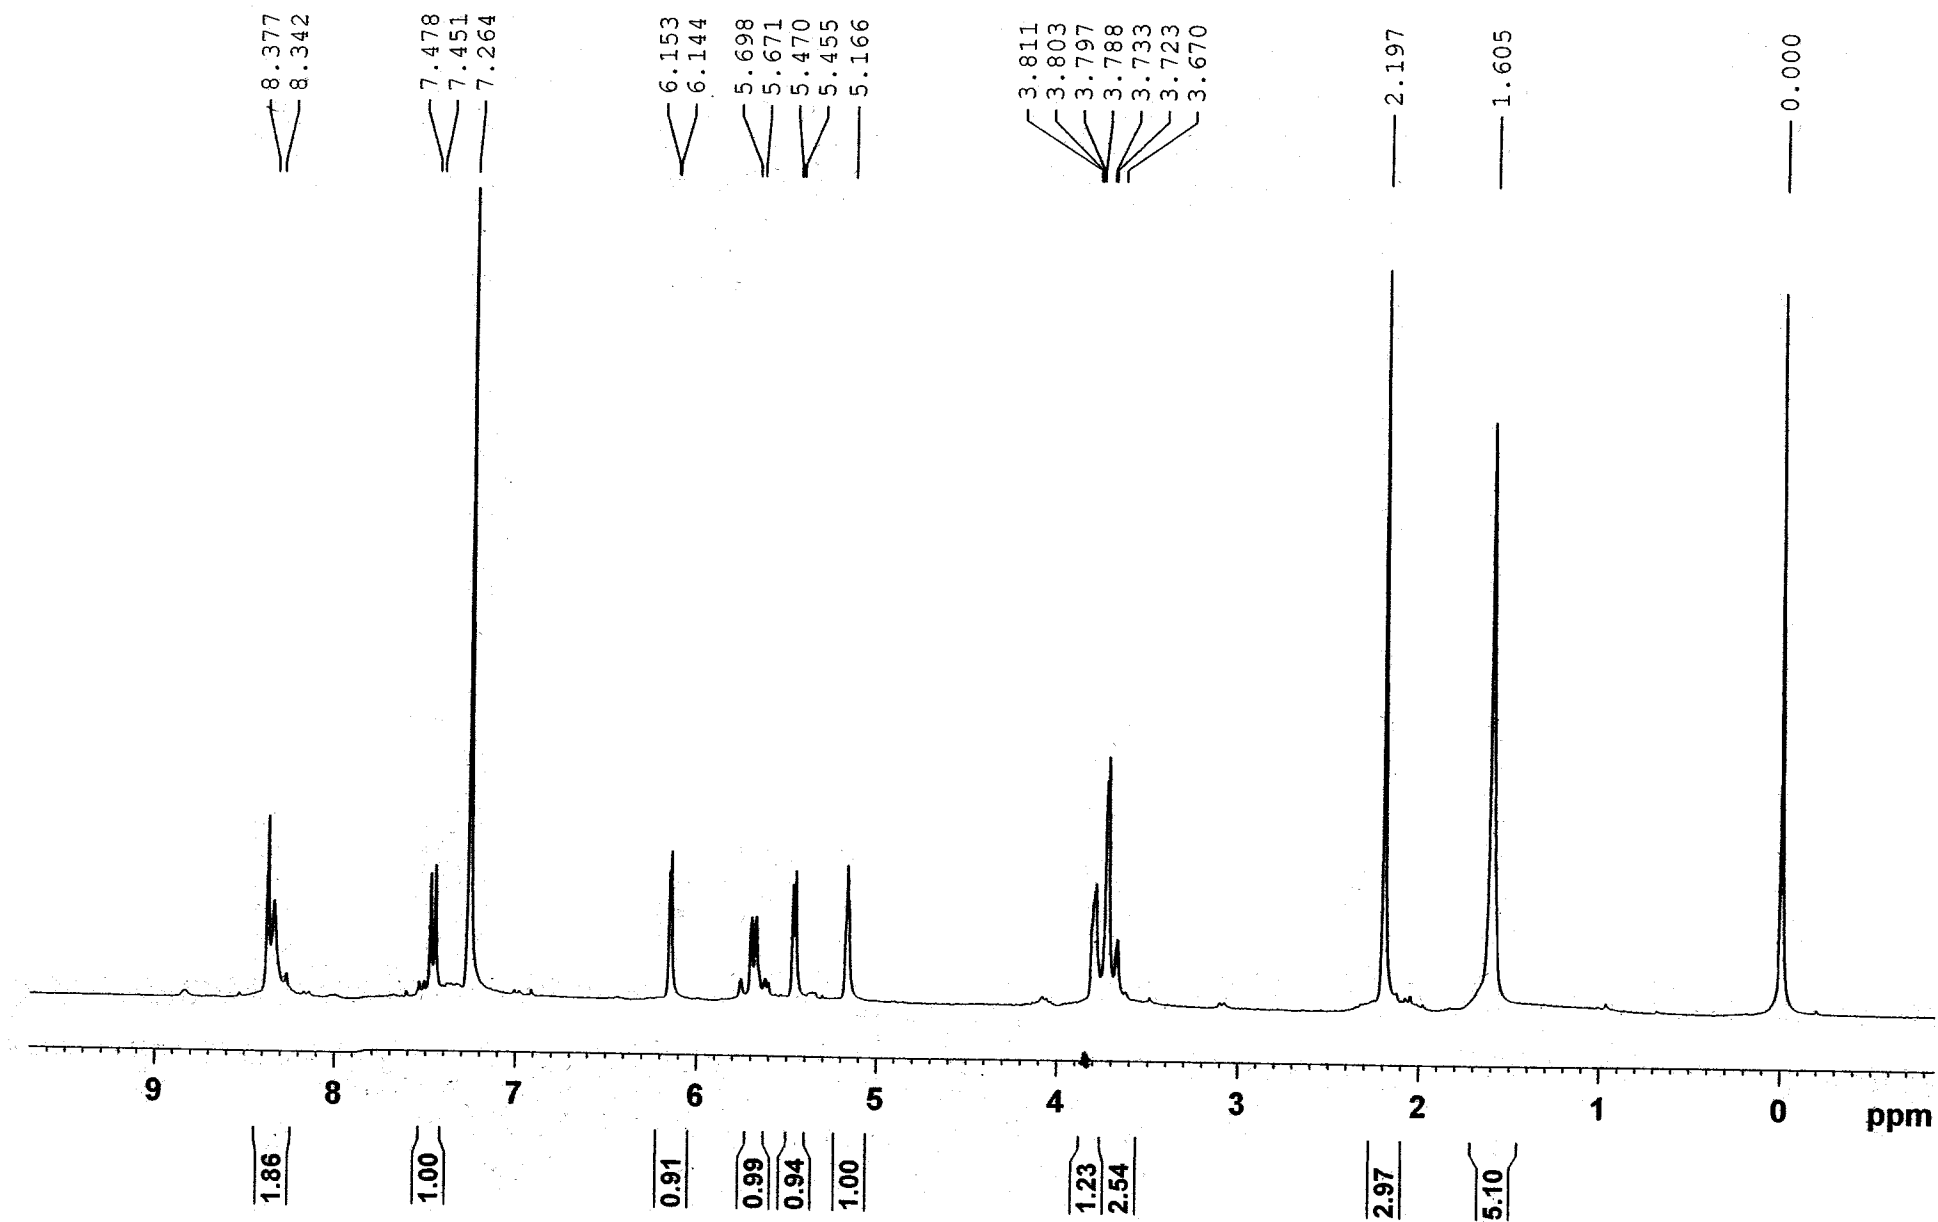

Supplement: c2ra20689g.pdf [file c2ra20689g.pdf]
